# Supplementary material for: Non-specific lipid transfer proteins in maize
Source: PubMed Central journal article supplement (PMC4226865; doi:10.1186/s12870-014-0281-8), 2014-10-28
Supplement: 12870_2014_281_MOESM1_ESM.pdf [file 12870_2014_281_MOESM1_ESM.pdf]

**Table S1.** Maize genes encoding proteins with a Pfam domain PF00234 which belong to hybrid proline-rich proteins, alpha-amylase/trypsin inhibitors, prolamin storage proteins and 2S albumin storage proteins.

| <b>hybrid proline-rich proteins</b>     |                  |               |                  |
|-----------------------------------------|------------------|---------------|------------------|
| GRMZM2G379898                           | GRMZM2G351505    | GRMZM2G037255 | GRMZM2G094639    |
| GRMZM2G059964                           | GRMZM2G372102    | GRMZM2G372074 | GRMZM2G345700    |
| GRMZM2G162276                           | AC155352.2_FG010 | GRMZM5G873271 | GRMZM2G406313    |
| GRMZM2G410338                           | GRMZM2G398807    | GRMZM2G104945 | GRMZM2G058208    |
| GRMZM2G136367                           | GRMZM2G304378    | GRMZM2G040689 | AC234161.1_FG001 |
| AC234161.1_FG002                        | GRMZM2G407189    | GRMZM2G429000 | GRMZM2G391272    |
| GRMZM2G391286                           | GRMZM2G091534    | GRMZM2G031354 | GRMZM2G106324    |
| GRMZM2G027221                           | GRMZM2G027167    | GRMZM2G477697 | GRMZM2G477685    |
| <b>alpha-amylase/trypsin inhibitors</b> |                  |               |                  |
| GRMZM2G304548                           | GRMZM2G404688    |               |                  |
| <b>prolamin storage proteins</b>        |                  |               |                  |
| GRMZM2G060429                           | GRMZM2G138689    | GRMZM2G138727 |                  |
| <b>2S albumin storage proteins</b>      |                  |               |                  |
| GRMZM2G012148                           | GRMZM5G822180    | GRMZM2G410134 |                  |
