# Supplementary material for: Non-specific lipid transfer proteins in maize
Source: PubMed Central journal article supplement (PMC4226865; doi:10.1186/s12870-014-0281-8), 2014-10-28
Supplement: 12870_2014_281_MOESM2_ESM.pdf [file 12870_2014_281_MOESM2_ESM.pdf]

**Table S2.** The occurrence of non-specific lipid transfer proteins in maize, and some of their features.

<sup>1</sup>ECM, eight-cysteine motif.

<sup>2</sup>AA, number of amino acids.

<sup>3</sup>Mw, molecular weight in Dalton.

<sup>4</sup>pI, isoelectric point (cysteine residues were not taken into account in the pI calculation).

<sup>5</sup>Subcellular target for the protein. S = secretory pathway, C = cytoplasm.

| Name          | Gene ID          | Protein ID        | Chr. | W/C | Locus                | No. of introns in ORF | ECM <sup>1</sup>                   | Signal peptide  |     | Mature protein  |                 | Subcellular localization <sup>5</sup> | Sorghum Ortholog             | Rice Ortholog                                                           | Arabidopsis Ortholog                   |
|---------------|------------------|-------------------|------|-----|----------------------|-----------------------|------------------------------------|-----------------|-----|-----------------|-----------------|---------------------------------------|------------------------------|-------------------------------------------------------------------------|----------------------------------------|
|               |                  |                   |      |     |                      |                       |                                    | AA <sup>2</sup> | AA  | Mw <sup>3</sup> | pI <sup>4</sup> |                                       |                              |                                                                         |                                        |
| <b>Type 1</b> |                  |                   |      |     |                      |                       |                                    |                 |     |                 |                 |                                       |                              |                                                                         |                                        |
| ZmLTP1.1      | GRMZM2G126397    | GRMZM2G126397_P01 | 3    | W   | 184434264..184435351 | 0                     | CX{9}CX{14}CCX{19}CXCX{24}CX{13}C  | 28              | 95  | 9856.47         | 10.62           | S                                     | SbLTP1.2                     | OsLTP1.2, OsLTP1.4                                                      | AtLTP1.6, AtLTP1.10                    |
| ZmLTP1.2.1    | GRMZM2G010868    | GRMZM2G010868_P01 | 3    | C   | 230606444..230608235 | 0                     | CX{10}CX{14}CCX{19}CXCX{22}CX{13}C | 28              | 93  | 9087.23         | 11.4            | S                                     | SbLTP1.5, SbLTP1.6, SbLTP1.7 | OsLTP1.21, OsLTP1.22, OsLTP1.14, OsLTP1.17, OsLTP1.18                   | AtLTP1.1, AtLTP1.4, AtLTP1.5, AtLTP1.8 |
| ZmLTP1.2.2    |                  | GRMZM2G010868_P02 | 3    | C   | 230607424..230608235 | 0                     | CX{10}CX{14}CCX{19}CXCX{22}CX{13}C | 28              | 91  | 8873.99         | 11.4            | S                                     | SbLTP1.5, SbLTP1.6, SbLTP1.7 | OsLTP1.21, OsLTP1.22, OsLTP1.14, OsLTP1.17, OsLTP1.18                   | AtLTP1.1, AtLTP1.4, AtLTP1.5, AtLTP1.8 |
| ZmLTP1.3.1    | GRMZM2G107839    | GRMZM2G107839_P01 | 3    | W   | 231823510..231824603 | 0                     | CX{9}CX{14}CCX{19}CXCX{22}CX{13}C  | 30              | 127 | 12983.2         | 10.11           | S                                     | SbLTP1.4                     | OsLTP1.12, OsLTP1.19, OsLTP1.20                                         | AtLTP1.7, AtLTP1.11, AtLTP1.12         |
| ZmLTP1.3.2    |                  | GRMZM2G107839_P02 | 3    | W   | 231823868..231825026 | 0                     | CX{9}CX{14}CCX{19}CXCX{22}CX{13}C  | 30              | 93  | 9228.69         | 11.1            | S                                     | SbLTP1.4                     | OsLTP1.12, OsLTP1.19, OsLTP1.20                                         | AtLTP1.7, AtLTP1.11, AtLTP1.12         |
| ZmLTP1.4      | GRMZM2G096234    | GRMZM2G096234_P01 | 8    | C   | 25946151..25947246   | 0                     | CX{9}CX{15}CCX{19}CXCX{23}CX{13}C  | 26              | 100 | 9890.46         | 4.53            | S                                     | SbLTP1.1                     | OsLTP1.1                                                                | -                                      |
| ZmLTP1.5.1    | GRMZM2G025026    | GRMZM2G025026_P01 | 9    | W   | 61863515..61865024   | 0                     | CX{9}CX{17}CCX{19}CXCX{21}CX{13}C  | 24              | 95  | 10163.43        | 4.52            | S                                     | SbLTP1.9                     | -                                                                       | -                                      |
| ZmLTP1.5.2    |                  | GRMZM2G025026_P02 | 9    | W   | 61863624..61864642   | 0                     | CX{9}CX{17}CCX{19}CXCX{21}CX{13}C  | 24              | 93  | 9921.16         | 4.61            | S                                     | SbLTP1.9                     | -                                                                       | -                                      |
| ZmLTP1.6      | GRMZM2G101958    | GRMZM2G101958_P01 | 10   | C   | 4165442..4166593     | 0                     | CX{9}CX{14}CCX{18}CXCX{22}CX{13}C  | 28              | 93  | 9026.15         | 11              | S                                     | SbLTP1.5, SbLTP1.6, SbLTP1.7 | OsLTP1.21, OsLTP1.22, OsLTP1.14, OsLTP1.17, OsLTP1.18                   | AtLTP1.1, AtLTP1.4, AtLTP1.5, AtLTP1.8 |
| ZmLTP1.7.1    | GRMZM5G898755    | GRMZM5G898755_P02 | 10   | C   | 4243325..4244555     | 0                     | CX{9}CX{14}CCX{19}CXCX{23}CX{13}C  | 35              | 105 | 10164.64        | 9.86            | S                                     | SbLTP1.8                     | -                                                                       | -                                      |
| ZmLTP1.7.2    |                  | GRMZM5G898755_P01 | 10   | C   | 4243574..4244555     | 0                     | CX{9}CX{14}CCX{19}CXCX{23}CX{13}C  | 35              | 94  | 9131.41         | 10.42           | S                                     | SbLTP1.8                     | -                                                                       | -                                      |
| ZmLTP1.8      | GRMZM2G439268    | GRMZM2G439268_P01 | 10   | C   | 84608056..84608542   | 0                     | CX{9}CX{14}CCX{19}CXCX{22}CX{13}C  | 30              | 93  | 9799.24         | 5.21            | S                                     | SbLTP1.3                     | OsLTP1.7                                                                | -                                      |
| <b>Type 2</b> |                  |                   |      |     |                      |                       |                                    |                 |     |                 |                 |                                       |                              |                                                                         |                                        |
| ZmLTP2.1      | GRMZM2G137329    | GRMZM2G137329_P01 | 1    | C   | 3000161..3000884     | 0                     | CX{7}CX{13}CCX{8}CXCX{23}CX{6}C    | 25              | 73  | 7399.45         | 11.05           | S                                     | SbLTP2.1, SbLTP2.3           | OsLTP2.3, OsLTP2.7, OsLTP2.8, OsLTP2.9, OsLTP2.10, OsLTP2.11, OsLTP2.12 | AtLTP2.5, AtLTP2.11, AtLTP2.12         |
| ZmLTP2.2      | GRMZM2G081464    | GRMZM2G081464_P01 | 2    | C   | 220468734..220469483 | 0                     | CX{7}CX{13}CCX{8}CXCX{23}CX{6}C    | 28              | 71  | 7474.71         | 11.38           | S                                     | SbLTP2.7                     | OsLTP2.6, OsLTP2.13                                                     | -                                      |
| ZmLTP2.3      | GRMZM2G406552    | GRMZM2G406552_P01 | 4    | C   | 195759880..195760460 | 0                     | CX{7}CX{13}CCX{8}CXCX{23}CX{6}C    | 19              | 78  | 7988.29         | 9.7             | S                                     | -                            | -                                                                       | -                                      |
| ZmLTP2.4      | GRMZM2G387360    | GRMZM2G387360_P01 | 5    | W   | 23838144..23838818   | 0                     | CX{7}CX{13}CCX{8}CXCX{23}CX{6}C    | 28              | 68  | 7042.98         | 10.26           | S                                     | SbLTP2.1, SbLTP2.3           | OsLTP2.3, OsLTP2.7, OsLTP2.8, OsLTP2.9, OsLTP2.10, OsLTP2.11, OsLTP2.12 | AtLTP2.5, AtLTP2.11, AtLTP2.12         |
| ZmLTP2.5      | GRMZM2G039383    | GRMZM2G039383_P01 | 6    | C   | 86281901..86282589   | 0                     | CX{7}CX{12}CCX{8}CXCX{23}CX{6}C    | 20              | 74  | 7654.79         | 10.9            | S                                     | SbLTP2.7                     | OsLTP2.6, OsLTP2.13                                                     | -                                      |
| ZmLTP2.6      | GRMZM2G403007    | GRMZM2G403007_P01 | 6    | C   | 129702914..129703989 | 0                     | CX{7}CX{13}CCX{8}CXCX{23}CX{6}C    | 32              | 69  | 7214.41         | 10.28           | S                                     | SbLTP2.5                     | OsLTP2.4                                                                | AtLTP2.4, AtLTP2.9                     |
| ZmLTP2.7      | GRMZM2G004909    | GRMZM2G004909_P01 | 6    | W   | 162646836..162647576 | 0                     | CX{7}CX{13}CCX{8}CXCX{23}CX{6}C    | 32              | 69  | 7114.24         | 10.16           | S                                     | SbLTP2.5                     | OsLTP2.4                                                                | AtLTP2.4, AtLTP2.9                     |
| ZmLTP2.8      | GRMZM2G320373    | GRMZM2G320373_P01 | 6    | W   | 162662690..162663517 | 0                     | CX{7}CX{13}CCX{9}CXCX{23}CX{6}C    | 28              | 70  | 7370.69         | 11.61           | S                                     | SbLTP2.6                     | OsLTP2.5                                                                | -                                      |
| ZmLTP2.9      | GRMZM2G393150    | GRMZM2G393150_P01 | 8    | C   | 152130321..152131030 | 0                     | CX{7}CX{13}CCX{9}CXCX{23}CX{6}C    | 26              | 74  | 7797.14         | 10.36           | S                                     | SbLTP2.4                     | OsLTP2.2                                                                | -                                      |
| <b>Type C</b> |                  |                   |      |     |                      |                       |                                    |                 |     |                 |                 |                                       |                              |                                                                         |                                        |
| ZmLTPc1       | AC225127.3_FG003 | AC225127.3_FGP003 | 4    | C   | 195060826..195061640 | 0                     | CX{9}CX{14}CCX{9}CXCX{12}CX{6}C    | 23              | 80  | 7855.96         | 8.76            | S                                     | SbLTPc2                      | OsLTPc1                                                                 | AtLTPc2                                |
| ZmLTPc2.1     | GRMZM2G073377    | GRMZM2G073377_P01 | 7    | W   | 141644107..141645231 | 0                     | CX{9}CX{19}CCX{9}CXCX{12}CX{6}C    | 41              | 68  | 6854.02         | 9.98            | S                                     | SbLTPc1                      | OsLTPc2                                                                 | -                                      |
| ZmLTPc2.2     |                  | GRMZM2G073377_P04 | 7    | W   | 141644109..141644635 | 0                     | CX{9}CX{19}CCX{9}CXCX{12}CX{6}C    | 41              | 78  | 7922.28         | 10.02           | S                                     | SbLTPc1                      | OsLTPc2                                                                 | -                                      |
| <b>Type D</b> |                  |                   |      |     |                      |                       |                                    |                 |     |                 |                 |                                       |                              |                                                                         |                                        |
| ZmLTPd1       | GRMZM2G031102    | GRMZM2G031102_P01 | 1    | C   | 31896751..31897513   | 0                     | CX{14}CX{14}CCX{11}CXCX{24}CX{10}C | 20              | 91  | 9301.72         | 9.4             | S                                     | SbLTPd9, SbLTPd11, SbLTPd12  | OsLTPd5, OsLTPd6, OsLTPd8                                               | AtLTPd7, AtLTPd8                       |
| ZmLTPd2       | GRMZM2G071771    | GRMZM2G071771_P01 | 2    | W   | 10823770..10824501   | 0                     | CX{9}CX{16}CCX{9}CXCX{26}CX{7}C    | 26              | 77  | 8046.4          | 10.4            | S                                     | SbLTPd5                      | OsLTPd4                                                                 | -                                      |
| ZmLTPd3.1     | GRMZM2G136364    | GRMZM2G136364_P01 | 2    | C   | 55687675..55688855   | 0                     | CX{14}CX{14}CCX{12}CXCX{24}CX{10}C | 16              | 103 | 10110.55        | 9.51            | S                                     | SbLTPd9, SbLTPd11, SbLTPd12  | OsLTPd5, OsLTPd6, OsLTPd8                                               | AtLTPd7, AtLTPd8                       |
| ZmLTPd3.2     |                  | GRMZM2G136364_P02 | 2    | C   | 55687675..55688855   | 0                     | CX{14}CX{14}CCX{12}CXCX{24}CX{10}C | 16              | 103 | 10215.73        | 8.99            | S                                     | SbLTPd9, SbLTPd11, SbLTPd12  | OsLTPd5, OsLTPd6, OsLTPd8                                               | AtLTPd7, AtLTPd8                       |
| ZmLTPd4       | GRMZM2G099867    | GRMZM2G099867_P01 | 2    | W   | 127959950..127960704 | 0                     | CX{14}CX{14}CCX{11}CXCX{24}CX{10}C | 20              | 91  | 9301.72         | 9.4             | S                                     | SbLTPd9, SbLTPd11, SbLTPd12  | OsLTPd5, OsLTPd6, OsLTPd8                                               | AtLTPd7, AtLTPd8                       |
| ZmLTPd5       | GRMZM2G164440    | GRMZM2G164440_P01 | 2    | C   | 156327934..156329194 | 0                     | CX{10}CX{17}CCX{9}CXCX{24}CX{7}C   | -               | -   | -               | -               | -                                     | SbLTPd4                      | OsLTPd3                                                                 | AtLTPd1, AtLTPd2                       |
| ZmLTPd6       | GRMZM2G087413    | GRMZM2G087413_P01 | 3    | W   | 138623892..138624577 | 1                     | CX{10}CX{17}CCX{9}CXCX{22}CX{9}C   | 20              | 87  | 9889.67         | 9.27            | S                                     | SbLTPd7, SbLTPd8, SbLTPd13   | OsLTPd9, OsLTPd10, OsLTPd13                                             | AtLTPd10                               |
| ZmLTPd7       | GRMZM2G396418    | GRMZM2G396418_P01 | 3    | C   | 162372093..162372586 | 0                     | CX{10}CX{18}CCX{9}CXCX{22}CX{8}C   | 28              | 78  | 8282.39         | 9.69            | S                                     | -                            | -                                                                       | -                                      |
| ZmLTPd8       | GRMZM2G065557    | GRMZM2G065557_P01 | 3    | W   | 179414637..179416401 | 0                     | CX{14}CX{14}CCX{11}CXCX{24}CX{10}C | 27              | 91  | 9360.23         | 11.37           | S                                     | SbLTPd9, SbLTPd11, SbLTPd12  | OsLTPd5, OsLTPd6, OsLTPd8                                               | AtLTPd7, AtLTPd8                       |
| ZmLTPd9.1     | GRMZM2G094632    | GRMZM2G094632_P02 | 5    | W   | 39411646..39412216   | 0                     | CX{10}CX{16}CCX{11}CXCX{23}CX{7}C  | 24              | 101 | 11106.72        | 5.7             | S                                     | SbLTPd1                      | OsLTPd11                                                                | -                                      |
| ZmLTPd9.2     |                  | GRMZM2G094632_P01 | 5    | W   | 39411646..39412902   | 0                     | CX{10}CX{16}CCX{11}CXCX{23}CX{7}C  | 24              | 92  | 9939.33         | 6.82            | S                                     | SbLTPd1                      | OsLTPd11                                                                | -                                      |
| ZmLTPd10      | AC233926.1_FG002 | AC233926.1_FGP002 | 7    | W   | 30954067..30954378   | 0                     | CX{9}CX{16}CCX{9}CXCX{26}CX{7}C    | 26              | 77  | 8046.4          | 10.4            | S                                     | SbLTPd5                      | OsLTPd4                                                                 | -                                      |
| ZmLTPd11      | GRMZM2G000221    | GRMZM2G000221_P01 | 7    | W   | 31086409..31087079   | 0                     | CX{9}CX{16}CCX{9}CXCX{26}CX{7}C    | 27              | 78  | 8153.49         | 6.77            | S                                     | SbLTPd6                      | -                                                                       | -                                      |
| ZmLTPd12      | GRMZM2G471051    | GRMZM2G471051_P01 | 8    | C   | 162752046..162752849 | 0                     | CX{9}CX{16}CCX{9}CXCX{21}C{8}C     | 29              | 78  | 8162.44         | 7.98            | S                                     | -                            | OsLTPd2                                                                 | -                                      |
| ZmLTPd13      | GRMZM2G170969    | GRMZM2G170969_P01 | 8    | C   | 162756043..162756672 | 0                     | CX{10}CX{11}CCX{9}CXCX{22}CX{6}C   | 29              | 71  | 7437.4          | 9.19            | S                                     | -                            | -                                                                       | -                                      |
| ZmLTPd14      | GRMZM2G091054    | GRMZM2G091054_P01 | 8    | C   | 171565757..171566487 | 1                     | CX{10}CX{17}CCX{9}CXCX{22}CX{9}C   | 24              | 87  | 9554.06         | 6.78            | S                                     | SbLTPd7, SbLTPd8, SbLTPd13   | OsLTPd9, OsLTPd10, OsLTPd13                                             | AtLTPd10                               |
| ZmLTPd15      | GRMZM2G155555    | GRMZM2G155555_P01 | 10   | C   | 96605920..96606680   | 1                     | CX{10}CX{15}CCX{9}CXCX{22}CX{9}C   | 27              | 93  | 10346.2         | 9.84            | S                                     | -                            | OsLTPd14                                                                | -                                      |
| ZmLTPd16      | GRMZM2G063375    | GRMZM2G063375_P01 | 10   | C   | 96617537..96618949   | 1                     | CX{10}CX{15}CCX{9}CXCX{22}CX{9}C   | 27              | 93  | 10302.08        | 9.46            | S                                     | -                            | OsLTPd14                                                                | -                                      |
| <b>Type G</b> |                  |                   |      |     |                      |                       |                                    |                 |     |                 |                 |                                       |                              |                                                                         |                                        |
| ZmLTPg1.1     |                  | GRMZM5G850455_P01 | 1    | W   | 14103040..14104304   | 0                     | CX{9}CX{14}CCX{12}CXCX{26}CX{9}C   | 23              | 188 | 19357.29        | 9.13            | S                                     | SbLTPg8, SbLTPg12            | OsLTPg2, OsLTPg19                                                       | AtLTPg6, AtLTPg13, AtLTPg14            |
| ZmLTPg1.2     | GRMZM5G850455    | GRMZM5G850455_P02 | 1    | W   | 14103040..14104361   | 2                     | CX{9}CX{14}CCX{12}CXCX{26}CX{9}C   | 23              | 169 | 16940.38        | 8.21            | S                                     | SbLTPg8, SbLTPg12            | OsLTPg2, OsLTPg19                                                       | AtLTPg6, AtLTPg13, AtLTPg14            |
| ZmLTPg1.3     |                  | GRMZM5G850455_P03 | 1    | W   | 14103040..14104361   | 1                     | CX{9}CX{14}CCX{12}CXCX{26}CX{9}C   | 23              | 224 | 22784.06        | 8.96            | S                                     | SbLTPg8, SbLTPg12            | OsLTPg2, OsLTPg19                                                       | AtLTPg6, AtLTPg13, AtLTPg14            |
| ZmLTPg2       | GRMZM2G174680    | GRMZM2G174680_P01 | 1    | C   | 52625970..52627201   | 1                     | CX{9}CX{16}CCX{13}CXCX{21}CX{9}C   | 29              | 160 | 15631.12        | 6.38            | S                                     | SbLTPg6                      | OsLTPg4                                                                 | -                                      |
| ZmLTPg3       | GRMZM2G078876    | GRMZM2G078876_P01 | 1    | C   | 66023613..66026784   | 2                     | CX{9}CX{16}CCX{14}CXCX{25}CX{9}C   | 25              | 156 | 15026.19        | 8.71            | S                                     | SbLTPg5                      | OsLTPg5, AtLTPg10                                                       | -                                      |
| ZmLTPg4       | GRMZM2G083725    | GRMZM2G083725_P01 | 1    | C   | 194657095..194659202 | 2                     | CX{9}CX{14}CCX{12}CXCX{29}CX{9}C   | 23              | 158 | 15977.04        | 6.97            | S                                     | -                            | -                                                                       | -                                      |

|               |                  |                   |    |   |                      |   |                                   |    |     |          |       |   |                    |                                       |                              |
|---------------|------------------|-------------------|----|---|----------------------|---|-----------------------------------|----|-----|----------|-------|---|--------------------|---------------------------------------|------------------------------|
| ZmLTPg5       | GRMZM2G097137    | GRMZM2G097137_P01 | 1  | W | 263198227..263201072 | 1 | CX{9}CX{15}CCX{12}CXCX{27}CX{9}C  | 28 | 133 | 12510.03 | 8.38  | S | SbLTPg3            | -                                     | -                            |
| ZmLTPg6       | GRMZM2G006047    | GRMZM2G006047_P02 | 1  | C | 287110810..287111891 | 2 | CX{9}CX{14}CCX{12}CXCX{26}CX{9}C  | 32 | 150 | 14309.15 | 9.87  | S | SbLTPx1, SbLTPg9,  | OsLTPg7, OsLTPg14, OsLTPg16, OsLTPg18 | AtLTPg15, AtLTPg19, AtLTPg26 |
| ZmLTPg7       | GRMZM2G005991    | GRMZM2G005991_P01 | 1  | C | 287146113..287147400 | 3 | CX{10}CX{17}CCX{12}CXCX{24}CX{8}C | 27 | 174 | 17391.17 | 8.63  | S | SbLTPg4            | OsLTPg8                               | AtLTPg16, AtLTPg20           |
| ZmLTPg8.1     | GRMZM2G065640    | GRMZM2G065640_P01 | 1  | W | 287188063..287188991 | 2 | CX{9}CX{14}CCX{12}CXCX{25}CX{9}C  | 24 | 175 | 17239.55 | 8.21  | S | SbLTPg2            | OsLTPg9                               | -                            |
| ZmLTPg8.2     |                  | GRMZM2G065640_P02 | 1  | W | 287188063..287188991 | 2 | CX{9}CX{14}CCX{12}CXCX{25}CX{9}C  | 24 | 158 | 15377.38 | 4.66  | S | SbLTPg2            | OsLTPg9                               | -                            |
| ZmLTPg9       | GRMZM2G168833    | GRMZM2G168833_P01 | 1  | W | 289786005..289788499 | 2 | CX{9}CX{16}CCX{12}CXCX{26}CX{8}C  | -  | -   | -        | -     | - | SbLTPg1            | OsLTPg10                              | -                            |
| ZmLTPg10      | GRMZM2G414620    | GRMZM2G414620_P01 | 2  | C | 41484533..41485576   | 1 | CX{9}CX{14}CCX{12}CXCX{24}CX{10}C | 35 | 180 | 18249.23 | 9.95  | S | SbLTPg19           | -                                     | -                            |
| ZmLTPg11      | GRMZM2G151021    | GRMZM2G151021_P01 | 2  | W | 47422297..47424522   | 2 | CX{12}CX{8}CCX{14}CXCX{24}CX{13}C | 27 | 190 | 19051.12 | 6.55  | S | SbLTPg18           | OsLTPg29                              | -                            |
| ZmLTPg12      | AC194203.3_FG003 | AC194203.3_FGP003 | 2  | C | 212487102..212487524 | 0 | CX{9}CX{16}CCX{14}CXCX{22}CX{9}C  | 22 | 118 | 11730.54 | 7.99  | S | SbLTPg13           | OsLTPg21                              | -                            |
| ZmLTPg13      | GRMZM2G176347    | GRMZM2G176347_P01 | 2  | C | 233632142..233633151 | 2 | CX{10}CX{18}CCX{12}CXCX{24}CX{8}C | 25 | 170 | 16664.09 | 11.1  | S | SbLTPg11           | OsLTPg17                              | -                            |
| ZmLTPg14      | GRMZM2G071575    | GRMZM2G071575_P01 | 4  | C | 45262758..45263990   | 2 | CX{9}CX{14}CCX{12}CXCX{29}CX{9}C  | 25 | 160 | 16219.39 | 6.97  | S | SbLTPg21           | OsLTPg22                              | AtLTPg4                      |
| ZmLTPg15      | GRMZM2G145054    | GRMZM2G145054_P01 | 4  | W | 126473476..126474249 | 1 | C{6}CX{13}CCX{12}CXCX{25}CX{5}C   | -  | -   | -        | -     | - | SbLTPg16           | -                                     | -                            |
| ZmLTPg16      | GRMZM2G130454    | GRMZM2G130454_P03 | 5  | W | 4429841..4430924     | 2 | CX{9}CX{14}CCX{12}CXCX{41}CX{20}C | 32 | 160 | 16243.38 | 11.34 | S | -                  | -                                     | -                            |
| ZmLTPg17.1    | GRMZM2G141858    | GRMZM2G141858_P01 | 5  | W | 49545870..49548495   | 2 | CX{6}CX{13}CCX{12}CXCX{25}CX{8}C  | 25 | 124 | 12692.44 | 6.93  | S | SbLTPg23           | OsLTPg13                              | AtLTPg7                      |
| ZmLTPg17.2    |                  | GRMZM2G141858_P02 | 5  | W | 49545872..49548469   | 1 | CX{6}CX{13}CCX{12}CXCX{25}CX{8}C  | 25 | 115 | 11827.49 | 6.93  | S | SbLTPg23           | OsLTPg13                              | AtLTPg7                      |
| ZmLTPg18      | GRMZM2G116167    | GRMZM2G116167_P01 | 5  | W | 59978801..59980128   | 2 | CX{6}CX{15}CCX{12}CXCX{25}CX{8}C  | 26 | 149 | 14486.34 | 10.8  | S | SbLTPg24           | OsLTPg24                              | -                            |
| ZmLTPg19      | GRMZM2G089400    | GRMZM2G089400_P01 | 6  | C | 89065818..89068077   | 2 | CX{5}CX{13}CCX{12}CXCX{25}CX{8}C  | 25 | 124 | 12805.72 | 8.27  | S | SbLTPg23           | OsLTPg13                              | AtLTPg7                      |
| ZmLTPg20.1    | GRMZM2G089288    | GRMZM2G089288_P03 | 7  | W | 8901782..8903227     | 2 | CX{9}CX{14}CCX{12}CXCX{25}CX{9}C  | 46 | 140 | 13977    | 4.27  | S | -                  | OsLTPg15                              | -                            |
| ZmLTPg20.2    |                  | GRMZM2G089288_P01 | 7  | W | 8901856..8903227     | 2 | CX{9}CX{14}CCX{12}CXCX{25}CX{9}C  | 29 | 140 | 13977    | 4.27  | S | -                  | OsLTPg15                              | -                            |
| ZmLTPg21      | GRMZM2G046750    | GRMZM2G046750_P01 | 7  | W | 9201072..9202357     | 2 | CX{10}CX{14}CCX{12}CXCX{24}CX{8}C | 33 | 187 | 17984.37 | 5.04  | C | SbLTPg10           | -                                     | -                            |
| ZmLTPg22      | GRMZM2G170044    | GRMZM2G170044_P01 | 7  | W | 16096163..16099019   | 2 | CX{9}CX{16}CCX{12}CXCX{26}CX{8}C  | 28 | 178 | 17674.11 | 9.05  | S | SbLTPg8, SbLTPg12  | OsLTPg2, OsLTPg19                     | AtLTPg6, AtLTPg13, AtLTPg14  |
| ZmLTPg23      | GRMZM2G171597    | GRMZM2G171597_P01 | 7  | C | 167020090..167021470 | 2 | CX{9}CX{16}CCX{14}CXCX{22}CX{9}C  | 24 | 145 | 14127.38 | 10.37 | S | SbLTPg13           | OsLTPg21                              | -                            |
| ZmLTPg24      | GRMZM2G379035    | GRMZM2G379035_P01 | 8  | C | 171016014..171017268 | 2 | CX{9}CX{16}CCX{12}CXCX{25}CX{9}C  | 27 | 167 | 16275.83 | 5.14  | S | SbLTPg15, SbLTPg22 | OsLTPg1, OsLTPg12                     | AtLTPg21                     |
| ZmLTPg25      | GRMZM2G004466    | GRMZM2G004466_P01 | 9  | W | 149245864..149247159 | 2 | CX{9}CX{16}CCX{12}CXCX{24}CX{9}C  | 28 | 175 | 17097.42 | 8.13  | S | SbLTPg7            | OsLTPg3                               | AtLTPg11, AtLTPg31           |
| ZmLTPg26      | GRMZM2G140646    | GRMZM2G140646_P01 | 10 | C | 15003990..15007027   | 2 | CX{9}CX{21}CCX{18}CXCX{24}CX{20}C | 51 | 183 | 18124.19 | 5.51  | S | SbLTPg20           | OsLTPg28                              | -                            |
| <b>Single</b> |                  |                   |    |   |                      |   |                                   |    |     |          |       |   |                    |                                       |                              |
| ZmLTPx1.1     |                  | GRMZM2G036063_P01 | 7  | W | 45409454..45410733   | 1 | CX{9}CX{16}CCX{13}CXCX{26}CX{12}C | 24 | 144 | 14941.3  | 4.87  | S | SbLTPx3            | -                                     | -                            |
| ZmLTPx1.2     | GRMZM2G036063    | GRMZM2G036063_P02 | 7  | W | 45409455..45410645   | 1 | CX{9}CX{16}CCX{13}CXCX{26}CX{12}C | 24 | 145 | 15097.49 | 5.14  | S | SbLTPx3            | -                                     | -                            |
| ZmLTPx1.3     |                  | GRMZM2G036063_P03 | 7  | W | 45409465..45410441   | 0 | CX{9}CX{16}CCX{13}CXCX{26}CX{12}C | 24 | 130 | 13711.83 | 6.68  | S | SbLTPx3            | -                                     | -                            |
| ZmLTPx2       | GRMZM2G166484    | GRMZM2G166484_P01 | 10 | C | 118762389..118764275 | 2 | CX{12}CX{8}CCX{14}CXCX{24}CX{13}C | 21 | 170 | 17367.16 | 11.39 | S | -                  | -                                     | -                            |
