# Supplementary material for: Non-specific lipid transfer proteins in maize
Source: PubMed Central journal article supplement (PMC4226865; doi:10.1186/s12870-014-0281-8), 2014-10-28
Supplement: 12870_2014_281_MOESM3_ESM.pdf [file 12870_2014_281_MOESM3_ESM.pdf]

**Table S3.** Designations used for nsLTP sequences in this report, and their corresponding database accession numbers.

| Arabidopsis |             |        | Rice      |                  |        | Sorghum  |               |        |
|-------------|-------------|--------|-----------|------------------|--------|----------|---------------|--------|
| Name        | Locus       | Group  | Name      | Locus            | Group  | Name     | Locus         | Group  |
| AtLTP1.1    | AT2G15050.3 | Type 1 | OsLTP1.1  | LOC_Os01g12020.1 | Type 1 | SbLTP1.1 | Sb03g001580.1 | Type 1 |
| AtLTP1.2    | AT2G15325.1 | Type 1 | OsLTP1.2  | LOC_Os01g60740.1 | Type 1 | SbLTP1.2 | Sb03g038280.1 | Type 1 |
| AtLTP1.3    | AT2G18370.1 | Type 1 | OsLTP1.3  | LOC_Os03g59380.1 | Type 1 | SbLTP1.3 | Sb07g002600.1 | Type 1 |
| AtLTP1.4    | AT2G38530.1 | Type 1 | OsLTP1.4  | LOC_Os05g40010.1 | Type 1 | SbLTP1.4 | Sb08g002660.1 | Type 1 |
| AtLTP1.5    | AT2G38540.1 | Type 1 | OsLTP1.5  | LOC_Os06g06340.1 | Type 1 | SbLTP1.5 | Sb08g002670.1 | Type 1 |
| AtLTP1.6    | AT3G08770.1 | Type 1 | OsLTP1.6  | LOC_Os06g34840.1 | Type 1 | SbLTP1.6 | Sb08g002680.1 | Type 1 |
| AtLTP1.7    | AT3G51590.1 | Type 1 | OsLTP1.7  | LOC_Os08g03690.1 | Type 1 | SbLTP1.7 | Sb08g002690.1 | Type 1 |
| AtLTP1.8    | AT3G51600.1 | Type 1 | OsLTP1.9  | LOC_Os11g02350.1 | Type 1 | SbLTP1.8 | Sb08g002700.1 | Type 1 |
| AtLTP1.9    | AT4G33355.1 | Type 1 | OsLTP1.12 | LOC_Os11g02400.1 | Type 1 | SbLTP1.9 | Sb10g021170.1 | Type 1 |
| AtLTP1.10   | AT5G01870.1 | Type 1 | OsLTP1.13 | LOC_Os11g02424.2 | Type 1 | SbLTP2.1 | Sb01g017700.1 | Type 2 |
| AtLTP1.11   | AT5G59310.1 | Type 1 | OsLTP1.14 | LOC_Os11g24070.1 | Type 1 | SbLTP2.2 | Sb01g017710.1 | Type 2 |
| AtLTP1.12   | AT5G59320.1 | Type 1 | OsLTP1.16 | LOC_Os12g02300.1 | Type 1 | SbLTP2.3 | Sb01g049830.1 | Type 2 |
| AtLTP1.13   | AT4G28395.1 | Type 1 | OsLTP1.17 | LOC_Os12g02310.1 | Type 1 | SbLTP2.4 | Sb03g031720.1 | Type 2 |
| AtLTP2.2    | AT1G43666.1 | Type 2 | OsLTP1.18 | LOC_Os12g02320.1 | Type 1 | SbLTP2.5 | Sb09g027590.1 | Type 2 |
| AtLTP2.3    | AT1G43667.1 | Type 2 | OsLTP1.19 | LOC_Os12g02330.2 | Type 1 | SbLTP2.6 | Sb09g027600.1 | Type 2 |
| AtLTP2.4    | AT1G48750.1 | Type 2 | OsLTP1.20 | LOC_Os12g02340.1 | Type 1 | SbLTP2.7 | Sb10g029330.1 | Type 2 |
| AtLTP2.5    | AT1G66850.1 | Type 2 | OsLTP1.21 | LOC_Os11g02369.1 | Type 1 | SbLTPc1  | Sb02g030420.1 | Type C |
| AtLTP2.6    | AT1G73780.1 | Type 2 | OsLTP1.22 | LOC_Os11g02389.1 | Type 1 | SbLTPc2  | Sb07g025160.1 | Type C |
| AtLTP2.7    | AT2G14846.1 | Type 2 | OsLTP2.1  | LOC_Os01g49640.1 | Type 2 | SbLTPd1  | Sb01g026220.1 | Type D |
| AtLTP2.8    | AT3G12545   | Type 2 | OsLTP2.2  | LOC_Os01g49650.1 | Type 2 | SbLTPd2  | Sb01g026225.1 | Type D |
| AtLTP2.9    | AT3G18280.1 | Type 2 | OsLTP2.3  | LOC_Os03g02050.1 | Type 2 | SbLTPd3  | Sb01g026230.1 | Type D |
| AtLTP2.10   | AT3G57310.1 | Type 2 | OsLTP2.4  | LOC_Os05g47700.1 | Type 2 | SbLTPd4  | Sb02g009300.1 | Type D |
| AtLTP2.11   | AT5G38160.1 | Type 2 | OsLTP2.5  | LOC_Os05g47730.1 | Type 2 | SbLTPd5  | Sb02g009320.1 | Type D |
| AtLTP2.12   | AT5G38170.1 | Type 2 | OsLTP2.6  | LOC_Os06g49190.1 | Type 2 | SbLTPd6  | Sb02g009340.1 | Type D |
| AtLTP2.13   | AT5G38180.1 | Type 2 | OsLTP2.7  | LOC_Os10g36070.1 | Type 2 | SbLTPd7  | Sb03g037210.1 | Type D |
| AtLTP2.14   | AT5G38195.1 | Type 2 | OsLTP2.8  | LOC_Os10g36090.1 | Type 2 | SbLTPd8  | Sb03g037220.1 | Type D |
| AtLTPc1     | AT5G07230.1 | Type C | OsLTP2.9  | LOC_Os10g36100.1 | Type 2 | SbLTPd9  | Sb03g039880.1 | Type D |
| AtLTPc2     | AT5G52160.1 | Type C | OsLTP2.10 | LOC_Os10g36110.1 | Type 2 | SbLTPd10 | Sb03g043610.1 | Type D |
| AtLTPc3     | AT5G62080.1 | Type C | OsLTP2.11 | LOC_Os10g36160.1 | Type 2 | SbLTPd11 | Sb06g016160.1 | Type D |
| AtLTPd1     | AT5G48485.1 | Type D | OsLTP2.12 | LOC_Os10g36170.1 | Type 2 | SbLTPd12 | Sb06g016170.1 | Type D |
| AtLTPd2     | AT5G48490.1 | Type D | OsLTP2.13 | LOC_Os11g40530.1 | Type 2 | SbLTPd13 | Sb08g005360.1 | Type D |
| AtLTPd3     | AT5G55410.1 | Type D | OsLTPc1   | LOC_Os08g43290.1 | Type C | SbLTPg1  | Sb01g004610.1 | Type G |
| AtLTPd4     | AT5G55450.1 | Type D | OsLTPc2   | LOC_Os09g35700.1 | Type C | SbLTPg2  | Sb01g005410.1 | Type G |
| AtLTPd5     | AT5G55460.1 | Type D | OsLTPd1   | LOC_Os01g68580.1 | Type D | SbLTPg3  | Sb01g011270.1 | Type G |
| AtLTPd6     | AT2G37870.1 | Type D | OsLTPd2   | LOC_Os01g68589.1 | Type D | SbLTPg4  | Sb01g005420.1 | Type G |
| AtLTPd7     | AT3G53980.1 | Type D | OsLTPd3   | LOC_Os07g18750.1 | Type D | SbLTPg5  | Sb01g033830.1 | Type G |
| AtLTPd8     | AT5G05960.1 | Type D | OsLTPd4   | LOC_Os07g18990.1 | Type D | SbLTPg6  | Sb01g036750.1 | Type G |
| AtLTPd9     | AT1G32280.1 | Type D | OsLTPd5   | LOC_Os01g62980.1 | Type D | SbLTPg7  | Sb01g044330.1 | Type G |
| AtLTPd10    | AT4G30880.1 | Type D | OsLTPd6   | LOC_Os04g33920.1 | Type D | SbLTPg8  | Sb01g046080.1 | Type G |
| AtLTPd11    | AT4G33550.2 | Type D | OsLTPd7   | LOC_Os04g33930.2 | Type D | SbLTPg9  | Sb02g004130.1 | Type G |

|          |             |        |          |                  |        |          |               |        |
|----------|-------------|--------|----------|------------------|--------|----------|---------------|--------|
| AtLTPd12 | AT5G56480.1 | Type D | OsLTPd8  | LOC_Os05g06780.1 | Type D | SbLTPg10 | Sb02g004200.1 | Type G |
| AtLTPe1  | AT3G07450.1 | Type E | OsLTPd9  | LOC_Os01g58650.1 | Type D | SbLTPg11 | Sb02g004210.1 | Type G |
| AtLTPe2  | AT3G52130.1 | Type E | OsLTPd10 | LOC_Os01g58660.1 | Type D | SbLTPg12 | Sb02g005900.1 | Type G |
| AtLTPg1  | AT1G03103.1 | Type G | OsLTPd11 | LOC_Os10g05720.2 | Type D | SbLTPg13 | Sb02g039860.1 | Type G |
| AtLTPg2  | AT1G05450.2 | Type G | OsLTPd12 | LOC_Os11g29420.1 | Type D | SbLTPg14 | Sb02g041710.1 | Type G |
| AtLTPg3  | AT1G18280.1 | Type G | OsLTPd13 | LOC_Os03g25350.1 | Type D | SbLTPg15 | Sb03g037810.1 | Type G |
| AtLTPg4  | AT1G27950.1 | Type G | OsLTPd14 | LOC_Os11g03870.1 | Type D | SbLTPg16 | Sb04g024055.1 | Type G |
| AtLTPg5  | AT1G36150.1 | Type G | OsLTPg1  | LOC_Os01g59870.1 | Type G | SbLTPg17 | Sb05g022630.1 | Type G |
| AtLTPg6  | AT1G55260.1 | Type G | OsLTPg2  | LOC_Os03g07100.1 | Type G | SbLTPg18 | Sb06g017510.1 | Type G |
| AtLTPg7  | AT1G62790.1 | Type G | OsLTPg3  | LOC_Os03g09230.1 | Type G | SbLTPg19 | Sb06g019070.1 | Type G |
| AtLTPg8  | AT1G73550.1 | Type G | OsLTPg4  | LOC_Os03g20760.1 | Type G | SbLTPg20 | Sb06g020910.1 | Type G |
| AtLTPg9  | AT1G73560.1 | Type G | OsLTPg5  | LOC_Os03g26800.1 | Type G | SbLTPg21 | Sb07g026120.1 | Type G |
| AtLTPg10 | AT1G73890.1 | Type G | OsLTPg6  | LOC_Os03g26820.1 | Type G | SbLTPg22 | Sb09g023870.1 | Type G |
| AtLTPg11 | AT2G13820.1 | Type G | OsLTPg7  | LOC_Os03g57970.1 | Type G | SbLTPg23 | Sb10g027810.1 | Type G |
| AtLTPg12 | AT2G27130.1 | Type G | OsLTPg8  | LOC_Os03g57980.1 | Type G | SbLTPg24 | Sb10g029740.1 | Type G |
| AtLTPg13 | AT2G44290.1 | Type G | OsLTPg9  | LOC_Os03g57990.1 | Type G | SbLTPx1  | Sb01g005430.1 | single |
| AtLTPg14 | AT2G44300.1 | Type G | OsLTPg10 | LOC_Os03g58940.1 | Type G | SbLTPx2  | Sb02g011135.1 | single |
| AtLTPg15 | AT2G48130.1 | Type G | OsLTPg11 | LOC_Os04g38840.1 | Type G | SbLTPx3  | Sb02g011205.1 | single |
| AtLTPg16 | AT2G48140.1 | Type G | OsLTPg12 | LOC_Os05g41030.1 | Type G |          |               |        |
| AtLTPg19 | AT3G22600.1 | Type G | OsLTPg13 | LOC_Os06g47200.1 | Type G |          |               |        |
| AtLTPg20 | AT3G22620.1 | Type G | OsLTPg14 | LOC_Os07g07790.1 | Type G |          |               |        |
| AtLTPg21 | AT3G43720.1 | Type G | OsLTPg15 | LOC_Os07g07870.1 | Type G |          |               |        |
| AtLTPg22 | AT3G58550.1 | Type G | OsLTPg16 | LOC_Os07g07860.1 | Type G |          |               |        |
| AtLTPg23 | AT4G08670.1 | Type G | OsLTPg17 | LOC_Os07g07920.1 | Type G |          |               |        |
| AtLTPg24 | AT4G12360.1 | Type G | OsLTPg18 | LOC_Os07g07930.1 | Type G |          |               |        |
| AtLTPg25 | AT4G14805.1 | Type G | OsLTPg19 | LOC_Os07g09970.1 | Type G |          |               |        |
| AtLTPG26 | AT4G14815.1 | Type G | OsLTPg20 | LOC_Os07g30590.1 | Type G |          |               |        |
| AtLTPG27 | AT4G22630.1 | Type G | OsLTPg21 | LOC_Os07g43290.1 | Type G |          |               |        |
| AtLTPG28 | AT4G22666.1 | Type G | OsLTPg22 | LOC_Os08g42040.1 | Type G |          |               |        |
| AtLTPG29 | AT5G09370.1 | Type G | OsLTPg23 | LOC_Os11g37320.1 | Type G |          |               |        |
| AtLTPG30 | AT5G13900.1 | Type G | OsLTPg24 | LOC_Os06g49770.1 | Type G |          |               |        |
| AtLTPG31 | AT5G64080.1 | Type G | OsLTPg25 | LOC_Os11g37280.1 | Type G |          |               |        |
| AtLTPg17 | AT3G22570.1 | single | OsLTPg28 | LOC_Os01g42210.1 | Type G |          |               |        |
| AtLTPg18 | AT3G22580.1 | single | OsLTPg29 | LOC_Os03g46110.1 | Type G |          |               |        |
| AtLTPG33 | AT4G22640.1 | single | OsLTPx1  | LOC_Os03g44000.1 | single |          |               |        |
| AtLTPG34 | AT4G22650.1 | single | OsLTPx2  | LOC_Os07g27940.1 | single |          |               |        |
| AtLTPx1  | AT1G52415.1 | single | OsLTPx3  | LOC_Os11g34660.1 | single |          |               |        |
| AtLTPx2  | AT1G64235.1 | single |          |                  |        |          |               |        |
| AtLTPx3  | AT4G08530.1 | single |          |                  |        |          |               |        |

---
