# Supplementary material for: Non-specific lipid transfer proteins in maize
Source: PubMed Central journal article supplement (PMC4226865; doi:10.1186/s12870-014-0281-8), 2014-10-28
Supplement: 12870_2014_281_MOESM4_ESM.pdf [file 12870_2014_281_MOESM4_ESM.pdf]

**Table S4.** Sorghum genes encoding proteins with a Pfam domain PF00234 which belong to hybrid proline-rich proteins, alpha-amylase/trypsin inhibitors, prolamin storage proteins and 2S albumin storage proteins.

| <b>hybrid proline-rich proteins</b>     |             |             |             |
|-----------------------------------------|-------------|-------------|-------------|
| Sb02g032910                             | Sb02g032920 | Sb02g037735 | Sb02g037740 |
| Sb09g024070                             | Sb02g041700 | Sb05g000960 | Sb02g011200 |
| Sb02g011170                             | Sb02g011190 | Sb04g032620 | Sb04g032650 |
| Sb06g024800                             | Sb10g025210 | Sb01g029450 | Sb10g000510 |
| Sb06g028200                             | Sb01g029630 | Sb01g029620 | Sb06g030490 |
| Sb05g003860                             | Sb01g009990 | Sb06g030500 | Sb10g004790 |
| Sb01g050420                             | Sb06g024770 | Sb04g032640 | Sb04g032670 |
| Sb01g029610                             | Sb04g032660 | Sb01g050360 | Sb04g032680 |
| Sb06g024780                             | Sb06g024790 |             |             |
| <b>alpha-amylase/trypsin inhibitors</b> |             |             |             |
| Sb02g006470                             | Sb02g006550 | Sb02g006480 | Sb02g002495 |
| Sb02g006570                             | Sb09g024570 | Sb02g006560 | Sb02g002500 |
| <b>prolamin storage proteins</b>        |             |             |             |
| Sb02g025490                             | Sb02g025510 | Sb09g000360 |             |
| <b>2S albumin storage proteins</b>      |             |             |             |
| Sb02g004220                             | Sb01g012630 | Sb01g012620 |             |
