# Supplementary material for: Non-specific lipid transfer proteins in maize
Source: PubMed Central journal article supplement (PMC4226865; doi:10.1186/s12870-014-0281-8), 2014-10-28
Supplement: 12870_2014_281_MOESM5_ESM.pdf [file 12870_2014_281_MOESM5_ESM.pdf]

**Table S5.** A summary of nsLTP genes in maize, sorghum, rice and Arabidopsis.

| Group  | <i>Zea mays</i> | <i>Sorghum bicolor</i> | <i>Oryza sativa</i> | <i>A. thaliana</i> |
|--------|-----------------|------------------------|---------------------|--------------------|
| Type 1 | 8               | 9                      | 18                  | 13                 |
| Type 2 | 9               | 7                      | 13                  | 13                 |
| Type C | 2               | 2                      | 2                   | 3                  |
| Type D | 16              | 13                     | 14                  | 12                 |
| Type E | 0               | 0                      | 0                   | 2                  |
| Type G | 26              | 24                     | 27                  | 29                 |
| single | 2               | 3                      | 3                   | 7                  |
| Tota   | 63              | 58                     | 77                  | 79                 |
