# Supplementary material for: Non-specific lipid transfer proteins in maize
Source: PubMed Central journal article supplement (PMC4226865; doi:10.1186/s12870-014-0281-8), 2014-10-28
Supplement: 12870_2014_281_MOESM6_ESM.pdf [file 12870_2014_281_MOESM6_ESM.pdf]

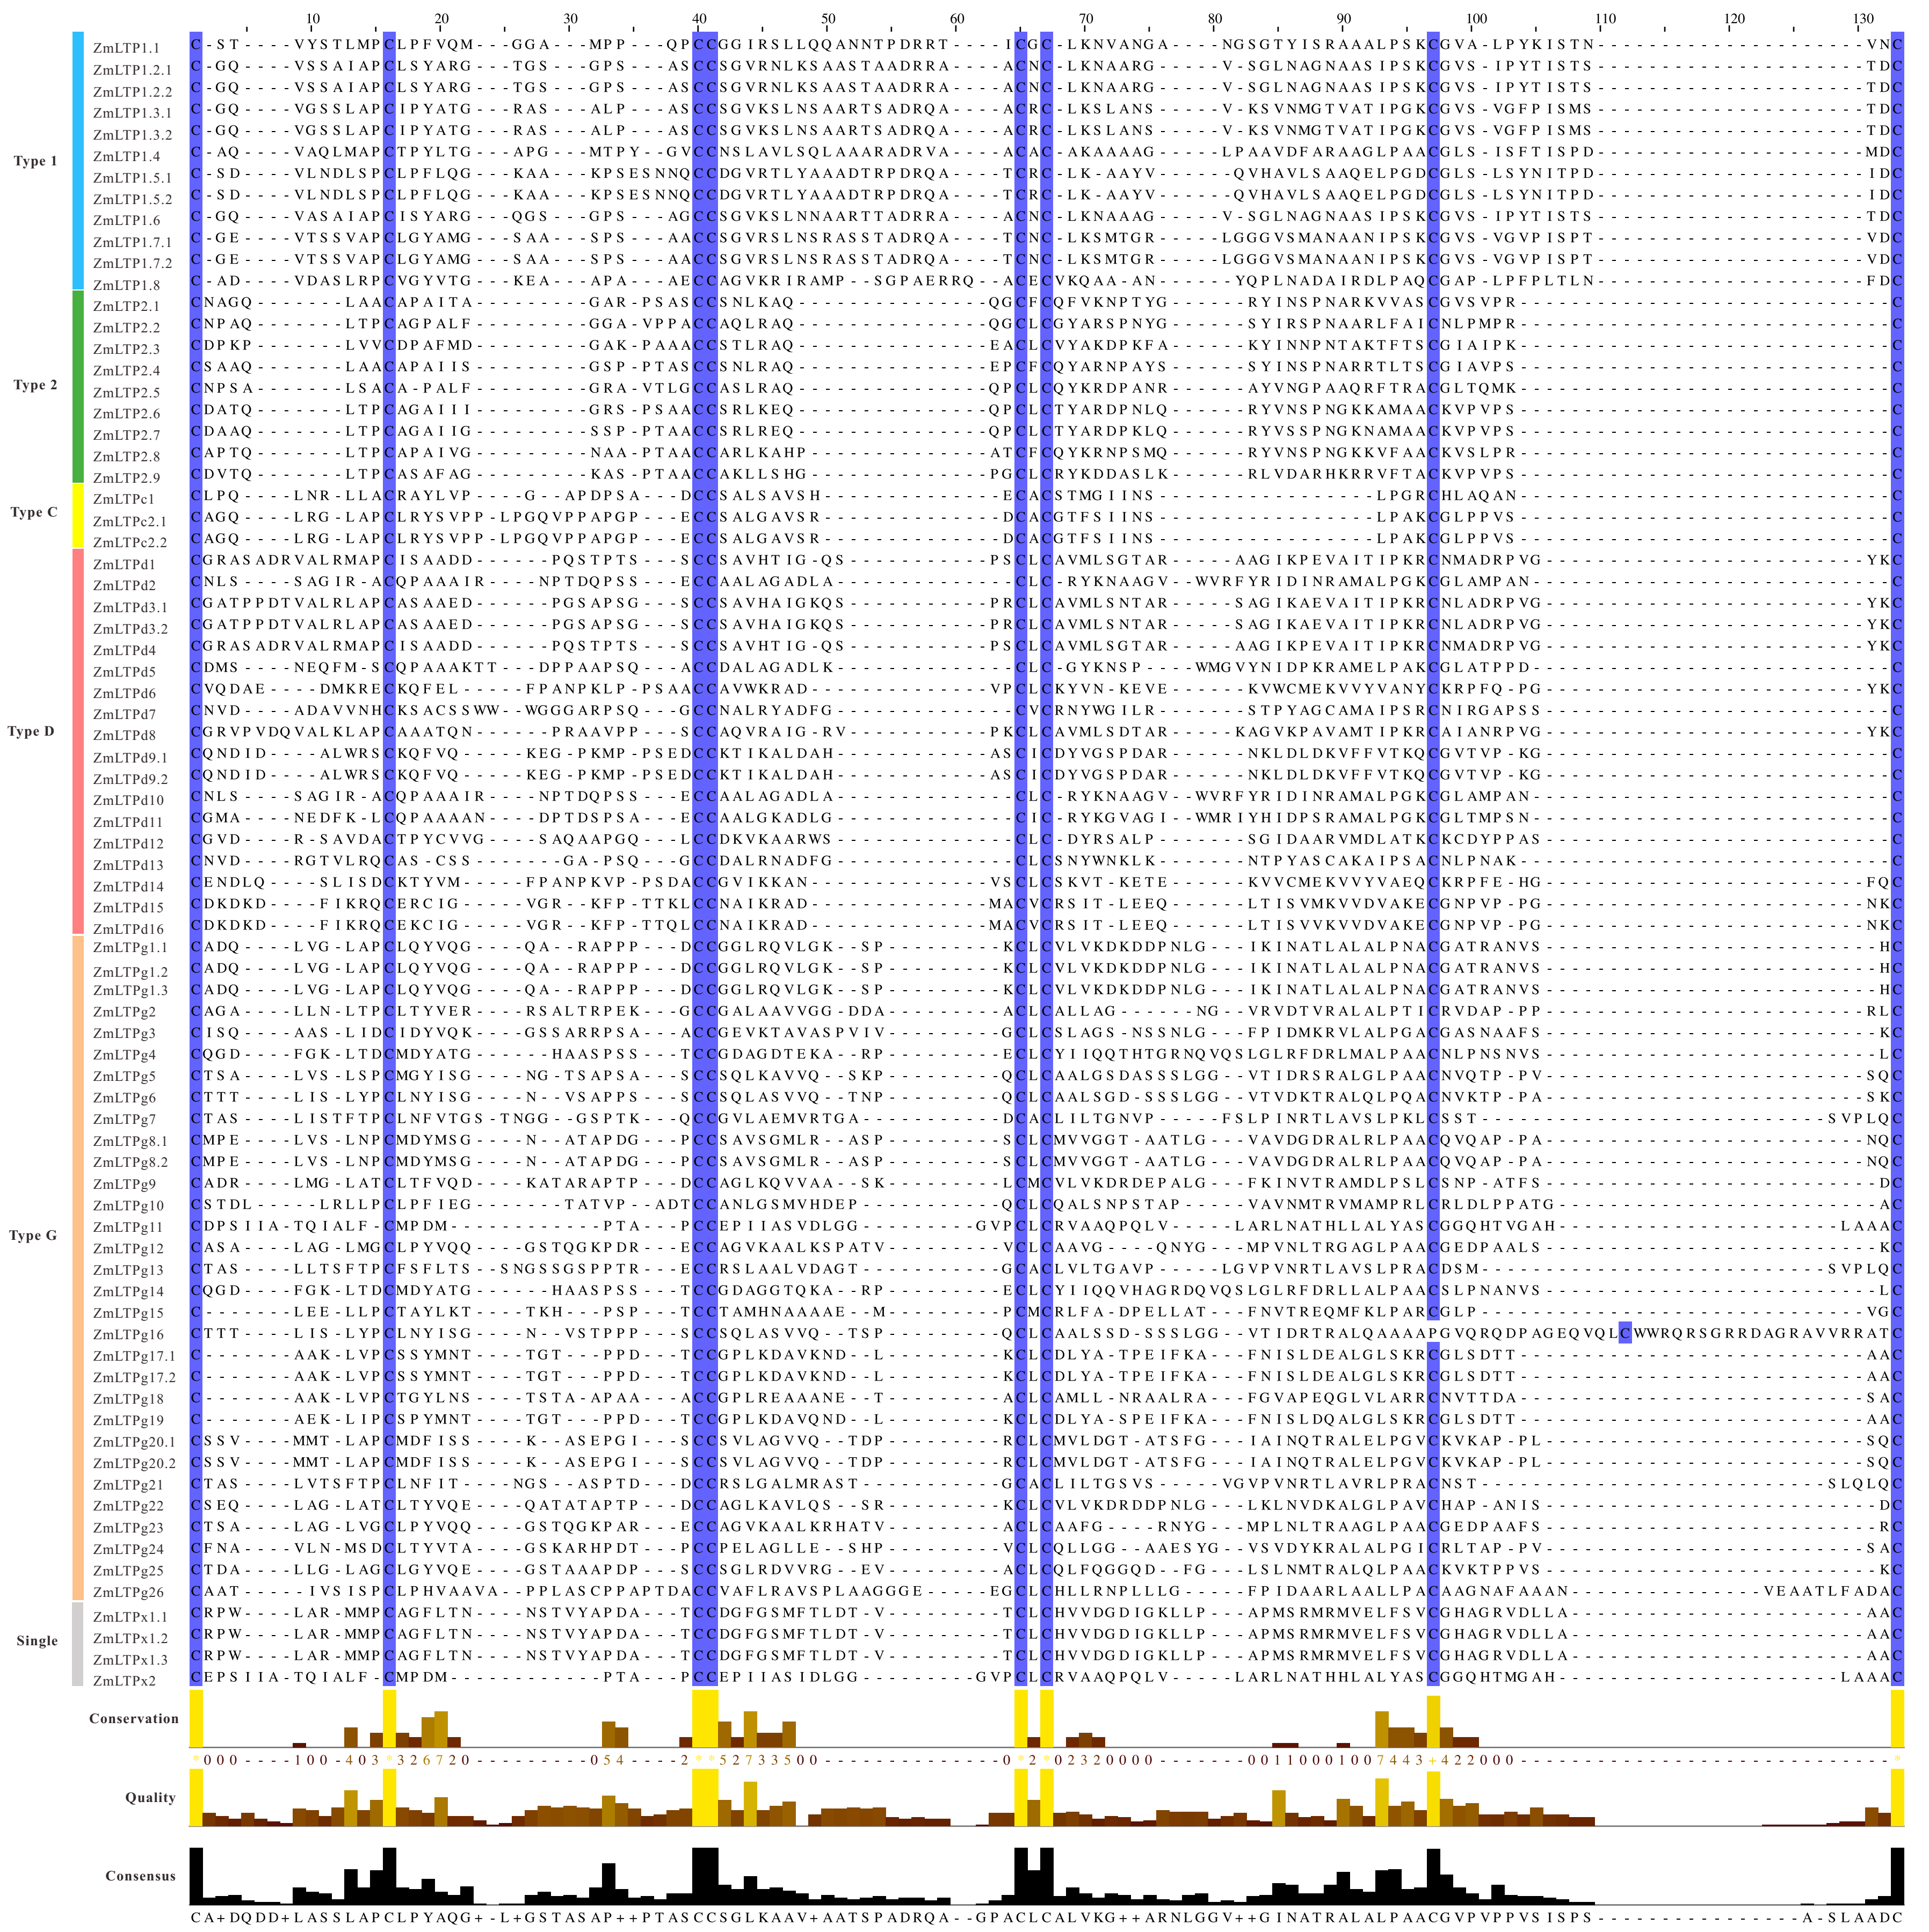

Type 1

Type 2

Type C

Type D

Type G

Single
