# Supplementary material for: Non-specific lipid transfer proteins in maize
Source: PubMed Central journal article supplement (PMC4226865; doi:10.1186/s12870-014-0281-8), 2014-10-28
Supplement: 12870_2014_281_MOESM7_ESM.pdf [file 12870_2014_281_MOESM7_ESM.pdf]

**Table S6.** Predicted phosphorylation sites in ZmLTPs.<sup>1</sup>phosphorylation site.<sup>2</sup>phosphorylated residue.

| Name       | Full length | Position <sup>1</sup> | Amino acide <sup>2</sup> | Name       | Full length | Position <sup>1</sup> | Amino acid <sup>2</sup> |
|------------|-------------|-----------------------|--------------------------|------------|-------------|-----------------------|-------------------------|
| ZmLTP1.5.2 | 117         | 110                   | theonine                 | ZmLTPg13   | 195         | 59                    | serine                  |
| ZmLTP2.4   | 96          | 79                    | serine                   |            |             | 122                   | serine                  |
| ZmLTPd1    | 111         | 49                    | theonine                 |            |             | 132                   | theonine                |
| ZmLTPd4    | 111         | 49                    | theonine                 | ZmLTPg14   | 185         | 144                   | theonine                |
| ZmLTPg1.1  | 211         | 126                   | serine                   |            |             | 150                   | serine                  |
|            |             | 183                   | serine                   | ZmLTPg15   | 166         | 11                    | serine                  |
| ZmLTPg1.2  | 192         | 128                   | serine                   |            |             | 17                    | serine                  |
| ZmLTPg1.3  | 247         | 126                   | serine                   | ZmLTPg16   | 192         | 84                    | serine                  |
|            |             | 183                   | serine                   | ZmLTPg17.1 | 149         | 106                   | serine                  |
| ZmLTPg2    | 189         | 153                   | theonine                 |            |             | 110                   | serine                  |
| ZmLTPg3    | 181         | 148                   | serine                   |            |             | 114                   | serine                  |
|            |             | 156                   | serine                   | ZmLTPg19   | 149         | 106                   | serine                  |
| ZmLTPg5    | 161         | 130                   | theonine                 |            |             | 110                   | serine                  |
| ZmLTPg6    | 182         | 84                    | serine                   |            |             | 114                   | serine                  |
|            |             | 127                   | theonine                 | ZmLTPg21   | 220         | 131                   | serine                  |
|            |             | 130                   | theonine                 | ZmLTPg23   | 169         | 136                   | theonine                |
| ZmLTPg7    | 201         | 11                    | serine                   |            |             | 148                   | serine                  |
|            |             | 162                   | serine                   | ZmLTPg24   | 194         | 166                   | serine                  |
| ZmLTPg8.1  | 199         | 124                   | serine                   | ZmLTPg25   | 203         | 30                    | theonine                |
|            |             | 158                   | serine                   |            |             | 33                    | serine                  |
|            |             | 163                   | serine                   |            |             | 116                   | theonine                |
|            |             | 170                   | serine                   |            |             | 148                   | serine                  |
|            |             | 175                   | serine                   |            |             | 150                   | theonine                |
| ZmLTPg8.2  | 182         | 124                   | serine                   |            |             | 155                   | theonine                |
|            |             | 147                   | theonine                 |            |             | 173                   | serine                  |
|            |             | 158                   | serine                   | ZmLTPg26   | 234         | 183                   | serine                  |
| ZmLTPg10   | 215         | 178                   | serine                   |            |             | 211                   | theonine                |
|            |             | 185                   | theonine                 | ZmLTPx1.2  | 169         | 161                   | serine                  |
| ZmLTPg11   | 217         | 114                   | serine                   | ZmLTPx2    | 191         | 141                   | theonine                |
|            |             | 188                   | theonine                 |            |             |                       |                         |
