# Supplementary material for: Non-specific lipid transfer proteins in maize
Source: PubMed Central journal article supplement (PMC4226865; doi:10.1186/s12870-014-0281-8), 2014-10-28

Legend: █ exon █ 8CMmotif — intron █ UTR — intron phase 1 2

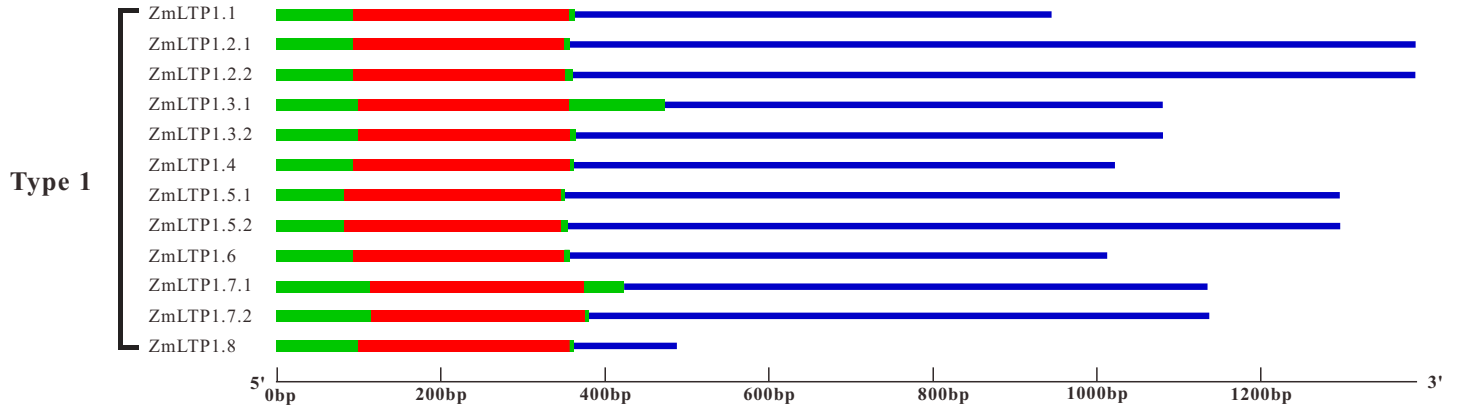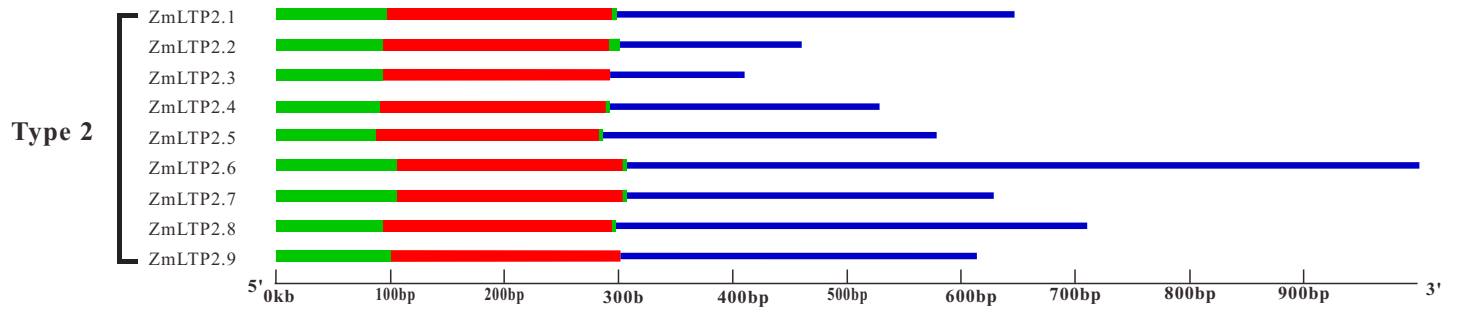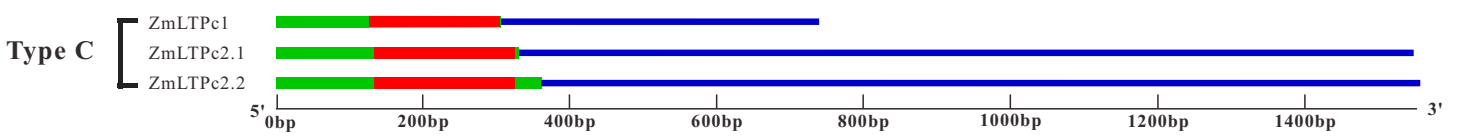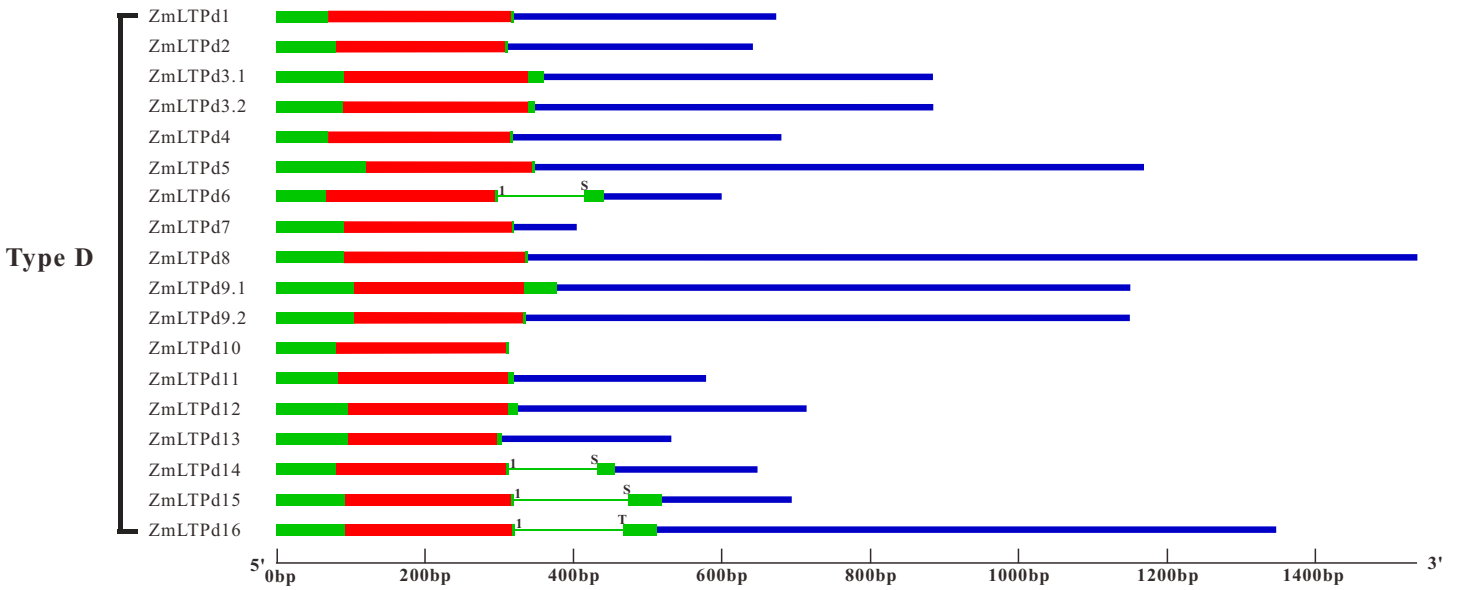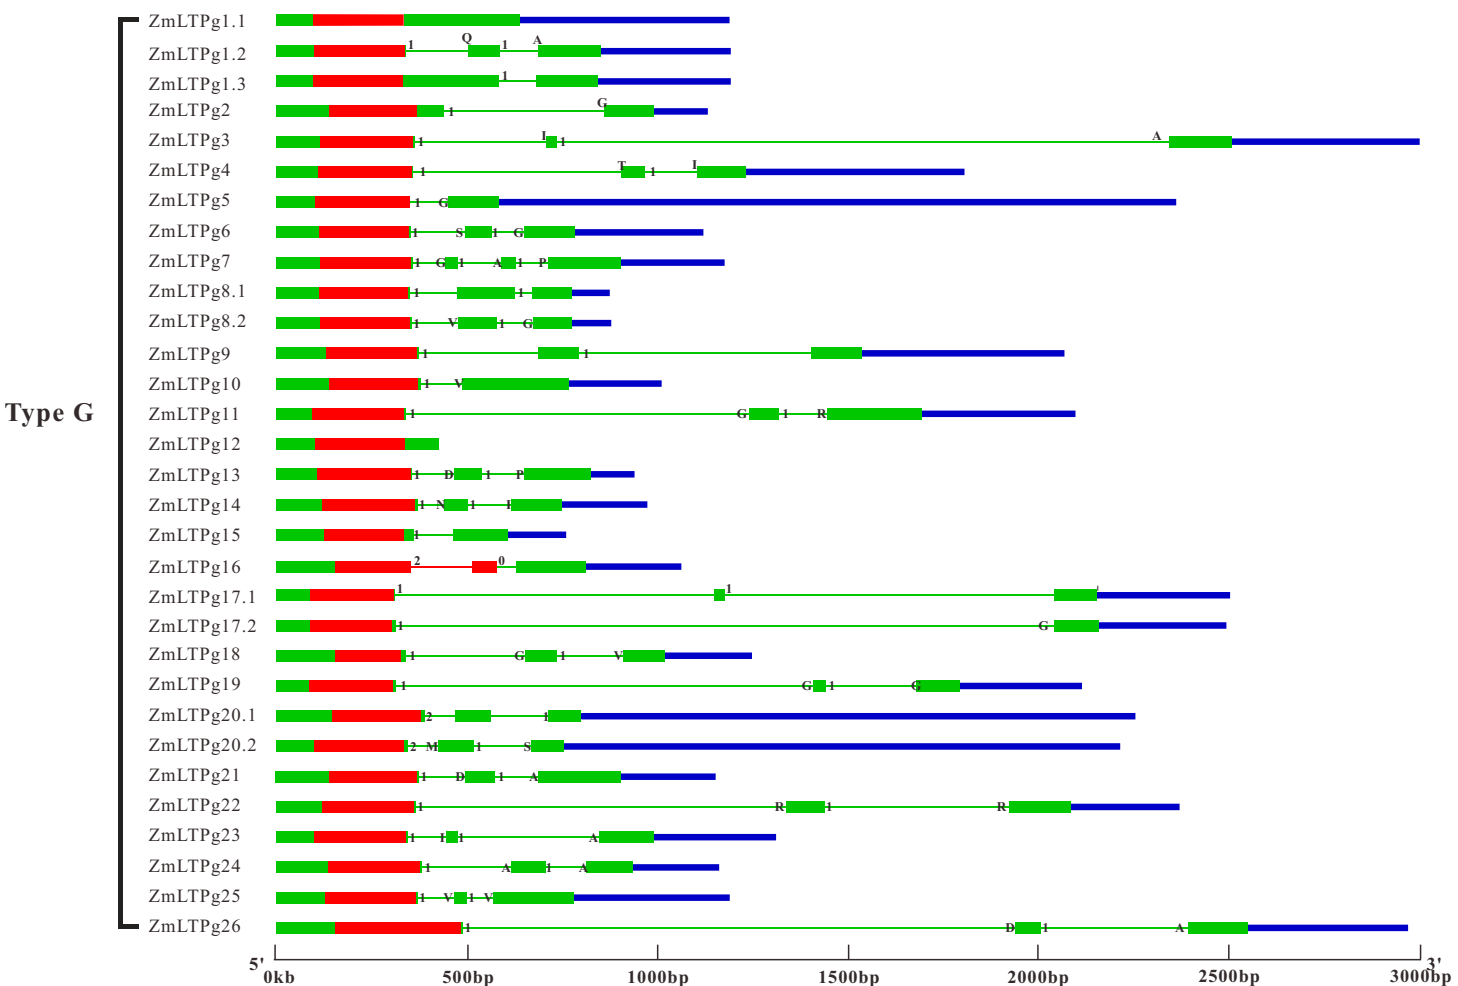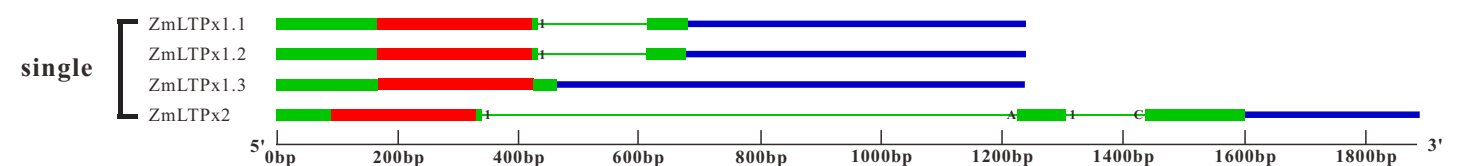

Supplement: 12870_2014_281_MOESM9_ESM.pdf [file 12870_2014_281_MOESM9_ESM.pdf]
