# Supplementary material for: Non-specific lipid transfer proteins in maize
Source: PubMed Central journal article supplement (PMC4226865; doi:10.1186/s12870-014-0281-8), 2014-10-28
Supplement: 12870_2014_281_MOESM11_ESM.pdf [file 12870_2014_281_MOESM11_ESM.pdf]

**log<sub>2.8</sub>-fold change**

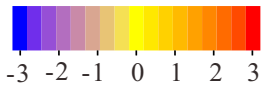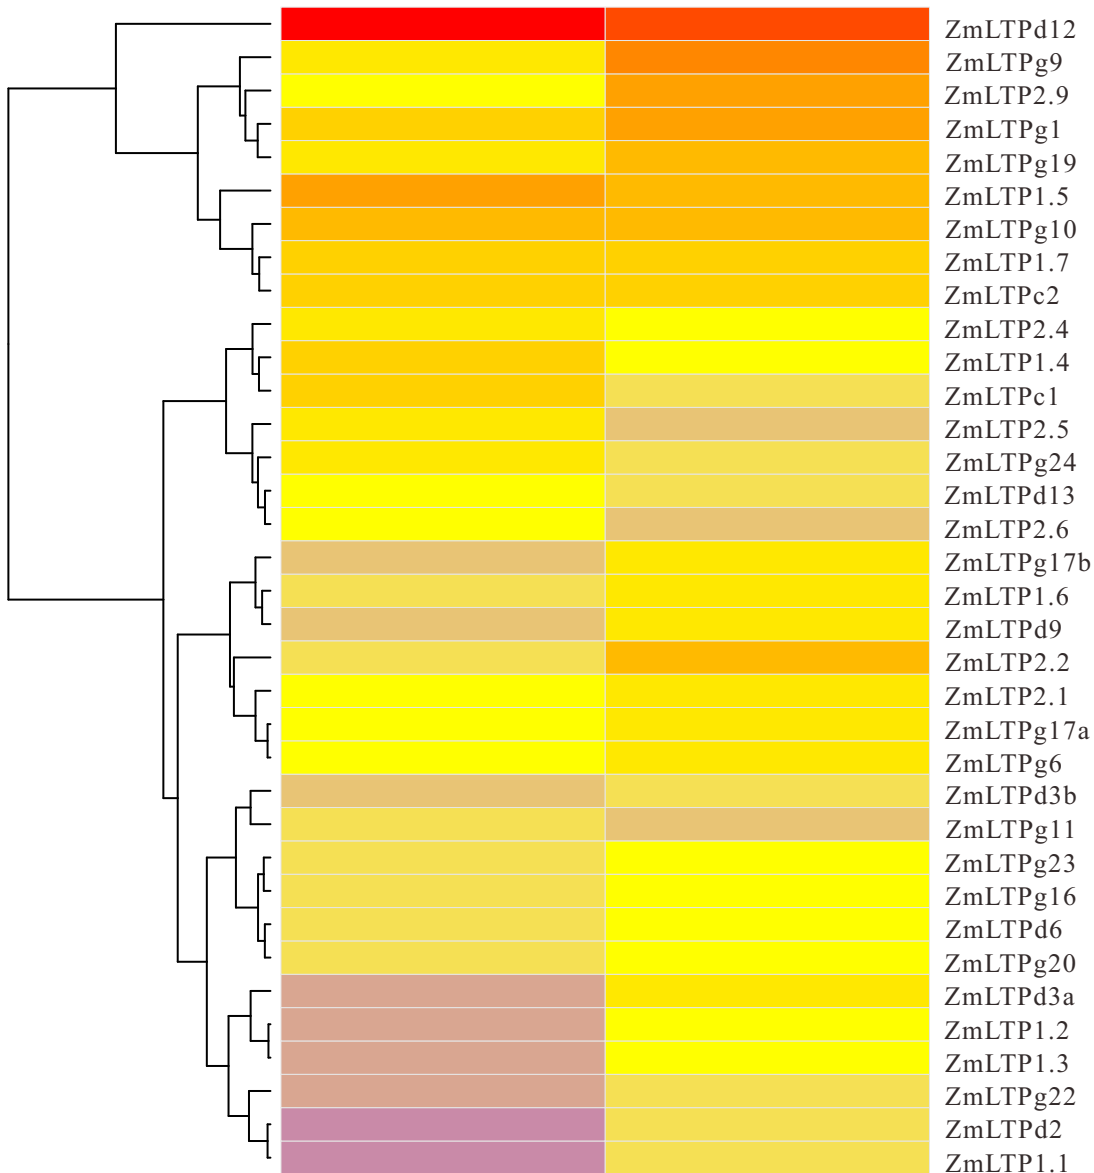

**ETH-DL3**

**ETH-DH7**
