# Supplementary material for: Non-specific lipid transfer proteins in maize
Source: PubMed Central journal article supplement (PMC4226865; doi:10.1186/s12870-014-0281-8), 2014-10-28
Supplement: 12870_2014_281_MOESM13_ESM.pdf [file 12870_2014_281_MOESM13_ESM.pdf]

**Table S9.** Analysis of *cis*-elements in the 1 kb sequence upstream of the translation initiation codon in ZmLTP genes.

| <i>cis</i> -element                  | Function                                                                      | ZmLTP1.1 | ZmLTP1.2 | ZmLTP1.3 | ZmLTP1.4 | ZmLTP1.5 | ZmLTP1.6 | ZmLTP1.7 | ZmLTP1.8 | ZmLTP2.1 |
|--------------------------------------|-------------------------------------------------------------------------------|----------|----------|----------|----------|----------|----------|----------|----------|----------|
| RY-element                           | <i>cis</i> -acting regulatory element involved in seed-specific regulation    |          |          |          |          |          |          |          |          |          |
| O2-site <sup>[18]</sup>              | <i>cis</i> -acting regulatory element involved in zein metabolism regulation  |          |          |          | 1        |          | 1        |          |          |          |
| CAT-box                              | <i>cis</i> -acting regulatory element related to meristem expression          |          |          |          |          |          |          | 1        | 1        | 1        |
| CCGTCC-box                           | <i>cis</i> -acting regulatory element related to meristem specific activation |          |          |          | 4        |          | 1        |          |          | 1        |
| NON-box                              | <i>cis</i> -acting regulatory element related to meristem specific activation |          |          |          |          |          |          |          |          |          |
| OCT                                  | <i>cis</i> -acting regulatory element related to meristem specific activation |          |          |          |          |          |          |          |          |          |
| Skn-1_motif                          | <i>cis</i> -acting regulatory element required for endosperm expression       | 1        | 1        | 2        | 1        | 2        | 1        | 1        | 3        | 2        |
| AACA_motif                           | involved in endosperm-specific negative expression                            |          |          |          |          |          |          |          |          |          |
| GCN4_motif <sup>[25]</sup>           | <i>cis</i> -regulatory element involved in endosperm expression               |          |          |          |          | 1        | 1        |          |          | 1        |
| circadian <sup>[9]</sup>             | <i>cis</i> -acting regulatory element involved in circadian control           |          | 1        | 2        |          |          |          |          | 2        |          |
| MSA-like                             | <i>cis</i> -acting element involved in cell cycle regulation                  |          |          |          |          |          | 1        |          | 1        |          |
| as-2-box <sup>[8]</sup>              | involved in shoot-specific expression and light responsiveness                |          |          |          |          |          |          | 1        |          |          |
| ACE <sup>[15]</sup>                  | <i>cis</i> -acting element involved in light responsiveness                   |          |          |          |          |          |          |          | 1        |          |
| C-box                                | <i>cis</i> -acting regulatory element involved in light responsiveness        |          |          |          | 1        |          |          |          |          |          |
| G-Box <sup>[10]</sup>                | <i>cis</i> -acting regulatory element involved in light responsiveness        |          |          |          | 1        |          | 3        | 6        | 2        |          |
| G-box                                | <i>cis</i> -acting regulatory element involved in light responsiveness        | 1        | 1        |          | 6        | 3        | 4        | 10       | 5        | 2        |
| ATCC-motif                           | part of a conserved DNA module involved in light responsiveness               |          |          |          |          |          |          |          |          |          |
| ATCT-motif                           | part of a conserved DNA module involved in light responsiveness               |          |          |          |          |          | 1        |          |          |          |
| Box 4 <sup>[12]</sup>                | part of a conserved DNA module involved in light responsiveness               |          |          |          |          | 1        | 1        | 2        |          | 2        |
| AE-box <sup>[19]</sup>               | part of a module for light response                                           | 1        |          |          |          |          |          |          |          |          |
| AT1-motif                            | part of a light responsive module                                             |          |          |          |          |          |          |          |          |          |
| Box II                               | part of a light responsive element                                            |          |          |          |          |          |          | 2        | 1        |          |
| CATT-motif                           | part of a light responsive element                                            | 1        |          |          |          |          |          |          |          |          |
| chs-CMA2a                            | part of a light responsive element                                            |          |          |          |          |          |          |          |          |          |
| chs-Unit 1 m1                        | part of a light responsive element                                            |          |          |          |          |          |          |          |          |          |
| GAG-motif <sup>[11]</sup>            | part of a light responsive element                                            |          |          |          | 1        |          | 2        | 2        |          | 1        |
| GA-motif <sup>[26]</sup>             | part of a light responsive element                                            |          |          | 1        |          |          | 1        |          |          |          |
| Gap-box                              | part of a light responsive element                                            |          |          |          |          |          |          |          |          |          |
| GATA-motif <sup>[11]</sup>           | part of a light responsive element                                            | 1        | 1        |          |          |          |          | 1        | 1        | 1        |
| GATT-motif                           | part of a light responsive element                                            |          |          |          |          | 1        |          |          |          | 1        |
| GTGGC-motif                          | part of a light responsive element                                            |          |          |          |          |          |          |          |          |          |
| I-box <sup>[4]</sup>                 | part of a light responsive element                                            | 1        |          |          |          | 1        | 1        | 1        | 2        | 2        |
| LAMP-element                         | part of a light responsive element                                            |          |          |          |          |          |          |          |          |          |
| L-box                                | part of a light responsive element                                            |          | 1        |          |          |          |          | 1        |          |          |
| LS7                                  | part of a light responsive element                                            |          |          |          |          |          |          |          |          |          |
| rbcS-CMA7a                           | part of a light responsive element                                            |          |          |          |          |          |          |          |          |          |
| TCCC-motif <sup>[20]</sup>           | part of a light responsive element                                            |          |          |          |          | 1        |          |          |          |          |
| TCT-motif <sup>[27]</sup>            | part of a light responsive element                                            |          |          |          |          |          | 1        |          |          |          |
| TGG-motif                            | part of a light responsive element                                            |          |          |          |          |          |          |          |          |          |
| 3-AF1                                | light responsive element                                                      |          |          |          |          |          |          |          |          |          |
| 4cl-CMA2a                            | light responsive element                                                      |          |          |          |          |          |          |          |          |          |
| AAAC-motif                           | light responsive element                                                      |          |          |          |          |          |          |          |          |          |
| Box I <sup>[23]</sup>                | light responsive element                                                      | 1        |          |          |          |          |          |          |          |          |
| GT1-motif <sup>[2]</sup>             | light responsive element                                                      |          | 3        |          |          |          |          | 1        | 2        | 1        |
| MNF1                                 | light responsive element                                                      |          | 1        | 1        |          | 2        |          |          |          |          |
| Sp1                                  | light responsive element                                                      | 4        | 1        |          | 4        |          | 2        | 2        | 5        |          |
| TGA-element <sup>[21]</sup>          | auxin-responsive element                                                      |          |          |          |          |          |          |          |          | 1        |
| AuxRR-core                           | <i>cis</i> -acting regulatory element involved in auxin responsiveness        | 1        | 1        | 1        |          |          |          |          |          | 1        |
| CGTCA-motif                          | <i>cis</i> -acting regulatory element involved in the MeJA-responsiveness     |          | 1        | 3        | 3        |          |          | 2        | 1        | 2        |
| TGACG-motif                          | <i>cis</i> -acting regulatory element involved in the MeJA-responsiveness     |          | 1        | 3        | 3        |          |          | 2        | 1        | 2        |
| TCA-element <sup>[24]</sup>          | <i>cis</i> -acting element involved in salicylic acid responsiveness          | 1        |          | 1        | 1        |          |          | 1        |          |          |
| SARE                                 | <i>cis</i> -acting element involved in salicylic acid responsiveness          |          |          |          |          |          |          |          |          |          |
| ABRE <sup>[6]</sup>                  | <i>cis</i> -acting element involved in the abscisic acid responsiveness       | 2        |          |          |          | 1        |          | 1        | 2        |          |
| motif IIb                            | abscisic acid responsive element                                              |          |          |          |          |          |          |          | 1        |          |
| CE3                                  | <i>cis</i> -acting element involved in ABA and VP1 responsiveness             |          |          |          |          |          |          |          |          |          |
| TATC-box                             | <i>cis</i> -acting element involved in gibberellin-responsiveness             |          |          |          |          |          | 1        |          |          | 45       |
| GARE-motif <sup>[3]</sup>            | gibberellin-responsive element                                                |          |          | 1        |          |          | 1        |          |          | 2        |
| P-box <sup>[22]</sup>                | gibberellin-responsive element                                                |          |          |          | 1        |          |          |          |          |          |
| ERE <sup>[28]</sup>                  | ethylene-responsive element                                                   |          |          |          |          |          |          |          |          |          |
| Box-W1 <sup>[16]</sup>               | fungal elicitor responsive element                                            |          |          |          |          |          |          |          |          | 1        |
| EIRE                                 | elicitor-responsive element                                                   |          |          |          |          |          |          |          |          |          |
| WUN-motif                            | wound-responsive element                                                      |          |          |          |          |          |          |          |          |          |
| TC-rich repeats <sup>[17]</sup>      | <i>cis</i> -acting element involved in defense and stress responsiveness      | 2        | 1        |          |          |          |          |          |          |          |
| HSE <sup>[24]</sup>                  | <i>cis</i> -acting element involved in heat stress responsiveness             |          |          |          |          |          | 1        | 1        |          |          |
| LTR <sup>[7]</sup>                   | <i>cis</i> -acting element involved in low-temperature responsiveness         |          |          |          | 1        | 1        |          |          |          | 1        |
| C-repeat/DRE                         | regulatory element involved in cold- and dehydration-responsiveness           |          |          |          | 1        |          |          |          |          |          |
| ARE <sup>[13]</sup>                  | <i>cis</i> -acting regulatory element essential for the anaerobic induction   | 1        |          |          |          |          |          |          |          | 1        |
| GC-motif <sup>[13]</sup>             | enhancer-like element involved in anoxic specific inducibility                | 1        |          |          | 2        |          |          | 1        | 1        |          |
| MBS <sup>[5]</sup>                   | MYB binding site involved in drought-inducibility                             |          | 2        |          | 2        | 1        | 1        | 1        |          | 3        |
| MBSII                                | MYB binding site involved in flavonoid biosynthetic genes regulation          | 1        |          |          |          |          |          |          |          |          |
| MBSII                                | MYB binding site involved in flavonoid biosynthetic genes regulation          | 1        |          |          |          |          |          |          |          |          |
| MRE                                  | MYB binding site involved in light responsiveness                             |          |          | 1        |          |          |          |          |          | 1        |
| CCAAT-box                            | MYBHv1 binding site                                                           |          | 1        | 1        | 1        |          | 1        |          |          |          |
| Box III                              | protein binding site                                                          | 1        |          |          |          |          |          |          |          |          |
| AT-rich element                      | Binding site of AT-rich DNA binding protein (ATBP-1)                          |          |          |          |          |          |          |          |          |          |
| A-box                                | <i>cis</i> -acting regulatory element                                         |          |          |          | 2        | 1        | 5        | 9        |          |          |
| OBP-1 site                           | <i>cis</i> -acting regulatory element                                         |          |          |          |          |          |          |          |          |          |
| ATGCAAAT motif                       | <i>cis</i> -acting regulatory element associated to the TGAGTCA motif         |          |          |          |          |          |          |          |          |          |
| TA-rich region                       | enhancer                                                                      |          |          |          |          | 33       |          |          |          |          |
| SUTR Py-rich stretch <sup>[14]</sup> | <i>cis</i> -acting element conferring high transcription levels               |          |          |          | 4        |          | 2        | 1        | 2        | 1        |
| CAAT-box                             | common <i>cis</i> -acting element in promoter and enhancer regions            | 8        | 15       | 6        | 8        | 12       | 6        | 14       | 7        | 15       |
| TATA-box                             | core promoter element around -30 of transcription start                       | 18       | 19       | 22       | 5        | 109      | 30       | 30       | 10       | 45       |

| ZmLTP2.2 | ZmLTP2.3 | ZmLTP2.4 | ZmLTP2.5 | ZmLTP2.6 | ZmLTP2.7 | ZmLTP2.8 | ZmLTP2.9 | ZmLTPc1 | ZmLTPc2 | ZmLTPd1 | ZmLTPd2 | ZmLTPd3 | ZmLTPd4 | ZmLTPd5 | ZmLTPd6 | ZmLTPd7 | ZmLTPd8 | ZmLTPd9 |
|----------|----------|----------|----------|----------|----------|----------|----------|---------|---------|---------|---------|---------|---------|---------|---------|---------|---------|---------|
|          | 1        |          | 1        |          |          |          |          |         |         |         |         |         |         | 1       | 1       | 1       |         |         |
| 1        |          | 1        | 1        |          | 1        | 2        |          |         | 1       |         | 1       |         |         | 2       |         | 1       |         |         |
| 1        |          | 1        |          |          | 2        | 2        |          |         |         | 2       |         | 1       |         | 2       |         | 3       |         |         |
|          |          |          |          |          |          | 1        |          | 4       |         | 2       |         |         | 1       | 2       |         | 3       |         |         |
|          | 1        | 1        | 1        | 1        |          | 2        | 3        |         | 1       |         | 3       |         | 1       | 1       | 1       | 3       | 2       | 1       |
| 1        |          | 1        |          | 1        | 2        | 1        | 1        |         |         | 1       | 1       |         |         |         | 1       |         |         |         |
|          |          |          | 2        |          |          | 1        |          |         | 3       | 2       |         | 4       |         |         | 1       | 2       |         |         |
|          |          |          |          |          |          |          | 1        |         |         |         |         |         |         |         |         |         |         |         |
| 1        | 1        |          | 1        | 1        | 2        |          | 1        |         |         |         | 1       |         |         |         |         |         | 2       | 2       |
| 1        |          | 2        |          |          | 1        | 3        | 2        | 1       | 2       |         | 1       | 1       | 1       | 2       | 1       | 1       | 6       | 1       |
| 6        |          | 5        |          | 2        | 2        | 7        | 3        | 2       | 2       |         | 1       | 2       | 1       | 4       | 2       | 3       | 10      | 1       |
|          |          |          |          |          |          | 1        |          |         |         |         |         |         |         |         |         |         |         |         |
|          | 1        |          | 1        |          |          |          |          |         |         |         | 1       |         |         | 1       | 1       |         |         |         |
| 1        | 2        |          | 1        | 1        |          |          |          |         |         | 1       | 3       |         |         |         | 1       |         |         |         |
|          |          |          |          |          |          |          |          |         |         |         | 3       |         |         |         | 1       | 1       | 1       | 1       |
|          |          |          |          |          |          |          |          | 1       |         |         | 1       |         |         |         |         |         |         |         |
|          |          | 5        | 1        |          |          |          |          |         |         |         |         |         |         | 1       |         | 1       |         |         |
|          |          |          |          |          |          |          |          |         |         |         |         |         | 1       |         |         |         |         |         |
| 1        | 1        |          |          |          | 1        | 1        |          | 2       | 1       |         |         |         | 1       | 1       | 1       |         |         | 1       |
|          |          |          |          |          |          |          |          | 1       |         |         |         |         |         |         | 2       |         |         |         |
|          |          |          | 1        |          | 1        |          |          |         |         |         |         | 1       |         |         |         |         |         |         |
| 1        | 1        |          |          |          | 2        | 1        |          |         |         |         |         |         |         | 1       |         |         |         | 2       |
|          |          |          | 1        |          |          |          |          |         |         |         |         |         |         |         |         |         |         |         |
|          |          |          | 1        |          |          |          |          |         |         |         |         |         |         |         |         |         |         | 1       |
|          | 1        |          | 1        |          |          |          |          |         |         |         | 1       |         |         |         | 1       |         |         | 1       |
|          |          |          |          |          | 1        |          |          |         |         |         |         |         |         |         | 1       |         |         | 1       |
| 2        | 1        |          | 1        | 1        |          |          |          |         | 1       | 2       |         |         |         | 1       | 1       | 2       |         | 1       |
|          |          | 1        | 2        |          | 1        |          |          | 1       |         |         | 2       |         |         | 2       |         |         |         | 2       |
|          | 1        | 2        | 1        | 2        | 2        | 4        | 4        | 4       | 1       | 2       |         | 1       | 1       | 4       | 1       |         |         |         |
| 1        | 1        | 1        | 1        |          |          |          | 1        |         |         | 1       | 1       |         | 1       | 2       |         | 1       | 1       | 1       |
| 2        |          |          | 1        |          |          | 3        | 3        |         | 1       |         | 2       | 2       | 1       |         |         | 1       | 1       | 3       |
| 2        |          |          | 1        |          | 3        | 3        | 3        |         | 1       |         | 2       | 2       | 1       |         |         | 3       | 1       |         |
| 1        | 2        | 1        |          | 1        | 1        | 1        | 1        |         | 1       | 3       | 1       |         | 1       |         | 1       |         |         | 1       |
| 1        | 5        | 1        | 2        |          | 1        | 1        |          |         |         | 1       |         | 1       |         | 2       | 1       |         |         | 1       |
| 1        |          | 1        | 1        |          | 1        | 1        | 1        |         | 1       |         |         |         | 1       |         |         |         |         |         |
|          |          |          | 1        |          |          |          |          | 2       |         |         |         |         |         |         | 1       |         | 3       |         |
|          |          | 1        | 1        |          | 1        |          |          |         |         |         |         |         |         |         |         |         |         |         |
|          |          |          |          | 1        |          |          |          |         |         | 1       |         |         |         | 1       | 1       | 1       |         | 1       |
|          |          |          |          |          |          | 1        |          |         |         |         |         |         |         |         |         |         |         |         |
|          | 1        |          |          |          |          |          | 1        |         |         |         | 2       |         |         |         | 1       | 2       |         | 1       |
| 1        |          |          | 1        |          |          |          |          | 1       |         |         |         | 2       | 1       | 1       | 2       |         | 1       | 1       |
|          |          |          |          |          |          |          |          |         |         |         |         |         |         |         |         |         |         |         |
|          | 1        |          |          |          |          |          | 1        | 2       |         |         |         |         |         |         |         |         | 1       | 1       |
|          |          | 1        |          |          |          |          |          | 1       | 2       | 1       |         |         | 2       |         |         | 3       |         |         |
|          |          | 3        | 1        | 1        | 1        |          |          | 3       | 2       | 1       | 2       | 3       |         |         |         | 1       |         |         |
| 1        |          |          |          |          |          |          | 1        |         |         | 1       |         |         |         |         | 1       |         |         | 1       |
|          |          |          |          |          |          |          |          |         |         |         |         |         |         |         |         |         |         |         |
|          |          | 2        |          | 2        | 1        | 2        | 3        | 1       | 2       |         |         |         |         | 2       | 1       | 2       | 6       | 1       |
|          |          |          |          |          |          |          |          |         |         |         | 1       |         |         |         |         |         |         |         |
|          |          |          |          |          |          |          |          |         |         |         |         | 1       |         |         |         |         |         |         |
| 1        |          | 1        |          |          |          | 1        |          | 4       |         | 2       |         |         | 1       | 2       |         | 1       |         |         |
| 10       | 10       | 6        | 11       | 16       | 12       | 11       | 5        | 11      | 18      | 15      | 12      | 12      | 4       | 13      | 20      | 8       | 7       | 19      |
| 43       | 93       | 13       | 27       | 28       | 13       | 6        | 22       | 13      | 23      | 32      | 39      | 16      | 8       | 19      | 74      | 35      | 7       | 16      |

| ZmLTPd10 | ZmLTPd11 | ZmLTPd12 | ZmLTPd13 | ZmLTPd14 | ZmLTPd15 | ZmLTPd16 | ZmLTPg1 | ZmLTPg2 | ZmLTPg3 | ZmLTPg4 | ZmLTPg5 | ZmLTPg6 | ZmLTPg7 | ZmLTPg8 | ZmLTPg9 | ZmLTPg10 | ZmLTPg11 | ZmLTPg12 |
|----------|----------|----------|----------|----------|----------|----------|---------|---------|---------|---------|---------|---------|---------|---------|---------|----------|----------|----------|
| 1        |          |          |          | 1        | 2        | 1        | 1       | 1       |         |         |         |         |         | 2       | 1       | 1        |          | 1        |
|          | 1        |          |          | 2        |          |          | 2       |         |         |         |         |         |         | 1       |         |          |          |          |
|          | 3        |          |          |          |          |          | 2       |         |         | 2       |         |         | 1       |         | 1       |          | 1        |          |
| 3        | 2        | 2        |          | 3        | 2        | 3        | 2       | 1       | 2       | 2       | 1       |         | 2       | 1       | 1       | 1        |          | 1        |
| 1        |          |          |          |          | 1        | 1        | 2       | 1       |         | 2       | 2       |         | 1       |         |         |          |          |          |
|          |          |          |          | 1        | 3        | 2        |         | 1       | 1       |         |         |         |         | 1       |         |          |          |          |
|          |          |          |          |          |          |          |         | 1       | 1       |         |         |         |         |         |         |          |          |          |
| 1        |          |          |          |          |          |          | 1       |         |         |         | 1       | 1       |         |         |         | 1        |          |          |
| 1        |          |          | 1        | 2        |          | 1        | 2       | 2       |         | 2       | 3       | 2       |         | 1       | 3       | 1        |          |          |
| 1        | 1        | 2        | 2        | 2        | 2        | 3        | 4       | 5       |         | 6       | 4       | 4       | 3       | 3       | 7       | 3        | 3        | 2        |
| 1        | 2        | 1        |          | 1        |          |          |         |         |         |         |         | 1       |         |         |         | 1        |          |          |
| 3        |          |          | 1        | 1        | 1        | 3        |         | 2       |         |         |         |         | 2       | 1       |         |          |          |          |
| 3        |          | 1        |          | 1        |          |          |         | 1       |         |         |         |         |         |         | 1       |          | 1        |          |
|          |          |          |          |          |          |          |         |         | 1       |         |         |         |         |         |         |          |          |          |
|          |          | 1        |          |          |          |          |         |         |         | 1       |         |         |         |         |         |          |          |          |
|          | 1        |          |          |          |          |          | 1       |         | 1       |         |         |         |         |         | 1       |          |          |          |
|          | 1        | 3        | 1        |          |          | 1        | 1       | 1       |         |         | 1       | 1       | 1       |         |         |          |          |          |
|          |          |          |          | 1        |          |          |         |         |         |         | 1       | 1       | 1       |         |         |          |          | 1        |
|          |          | 1        |          |          |          | 1        |         |         |         |         |         | 1       |         |         |         | 1        |          |          |
|          |          |          |          |          |          |          |         | 3       |         |         |         |         |         |         |         |          |          |          |
|          |          | 2        |          | 1        |          |          |         |         |         |         |         |         |         |         |         |          |          |          |
|          |          |          | 1        |          |          |          | 1       |         |         |         |         |         |         | 1       |         | 1        |          |          |
|          |          |          |          |          | 1        |          |         |         |         |         |         |         |         |         |         |          |          |          |
| 1        | 1        | 1        |          | 1        |          |          |         |         | 1       |         |         |         | 1       |         |         | 1        |          |          |
|          |          |          |          |          |          |          |         |         |         |         |         |         |         |         |         |          |          |          |
|          |          |          | 1        |          |          | 1        |         |         | 2       |         | 1       | 1       | 1       |         |         |          | 1        |          |
| 2        |          | 1        |          |          |          |          |         |         | 2       | 1       |         | 1       |         |         |         | 2        |          |          |
|          |          |          |          |          |          |          | 1       |         |         | 1       |         |         |         |         |         |          | 1        |          |
| 1        | 2        | 1        | 3        | 2        | 1        | 1        | 2       |         | 1       | 6       |         |         |         | 1       | 3       |          | 1        | 1        |
|          |          |          | 1        |          |          |          |         |         |         |         | 1       |         |         |         |         |          |          | 1        |
| 2        | 5        | 1        | 6        |          | 1        | 1        | 3       | 3       |         | 3       |         | 1       | 5       |         | 2       | 2        |          |          |
| 2        | 5        | 1        | 6        |          | 1        | 1        | 3       | 3       |         | 3       |         | 1       | 5       |         | 2       | 2        |          |          |
|          |          |          |          |          |          |          |         | 1       |         |         |         | 1       |         |         |         |          |          |          |
| 1        |          | 1        | 1        | 1        | 2        | 2        | 1       | 1       |         |         |         |         |         | 1       |         |          | 1        |          |
|          |          |          |          |          |          |          | 1       |         |         |         |         |         |         |         |         |          |          |          |
|          | 1        |          |          |          | 1        | 1        |         |         | 2       |         | 1       |         |         | 2       | 1       | 2        | 1        |          |
|          |          |          |          |          |          |          |         |         |         |         |         | 1       | 1       |         |         | 1        |          |          |
|          |          |          | 1        |          |          |          |         |         |         |         |         | 1       | 1       | 2       |         |          |          | 3        |
|          |          |          |          |          |          |          |         |         | 1       |         |         |         |         | 1       |         |          |          |          |
| 2        |          |          |          | 1        |          |          |         |         |         | 2       | 2       | 2       |         |         |         |          | 2        | 1        |
|          |          | 1        |          |          | 1        | 1        |         |         |         |         | 3       | 2       |         |         |         | 1        | 1        |          |
|          |          |          |          |          |          |          |         | 2       |         |         |         |         | 2       |         |         |          |          | 1        |
|          |          |          |          |          |          |          |         |         |         |         |         | 1       |         |         |         |          |          |          |
| 2        |          | 0        | 1        |          |          |          |         |         |         | 2       |         |         | 1       |         |         |          |          | 2        |
| 2        |          | 1        | 2        | 3        | 2        |          | 1       |         | 1       | 2       |         | 2       | 1       | 1       | 2       |          |          | 5        |
|          |          |          |          |          |          |          |         |         |         |         |         |         |         |         |         |          |          |          |
|          | 1        |          | 1        |          |          |          |         |         |         |         |         |         |         |         |         |          |          |          |
|          | 1        |          |          |          |          |          |         | 3       | 1       | 2       |         |         | 1       |         |         | 2        |          | 2        |
|          |          | 1        |          | 1        | 1        | 1        |         |         |         |         |         |         |         |         |         |          |          |          |
|          |          | 2        |          | 3        |          |          | 2       | 2       |         | 2       | 2       | 2       | 1       | 1       | 7       | 1        | 1        |          |
| 1        |          |          |          |          |          |          |         |         |         |         |         |         |         |         |         |          |          |          |
|          | 3        |          |          |          |          |          | 2       |         |         | 2       |         |         | 1       |         | 1       |          | 1        |          |
| 12       | 11       | 10       | 8        | 21       | 22       | 23       | 13      | 19      | 16      | 10      | 28      | 14      | 19      | 15      | 8       | 14       | 17       | 8        |
| 39       | 18       | 35       | 10       | 47       | 26       | 26       | 4       | 28      | 32      | 1       | 26      | 40      | 13      | 22      | 9       | 47       | 13       | 15       |

| ZmLTPg13 | ZmLTPg14 | ZmLTPg15 | ZmLTPg16 | ZmLTPg17 | ZmLTPg18 | ZmLTPg19 | ZmLTPg20 | ZmLTPg21 | ZmLTPg22 | ZmLTPg23 | ZmLTPg24 | ZmLTPg25 | ZmLTPg26 | ZmLTPx1 | ZmLTPx2 |
|----------|----------|----------|----------|----------|----------|----------|----------|----------|----------|----------|----------|----------|----------|---------|---------|
|          |          |          |          |          |          | 1        |          | 2        |          | 1        |          | 1        |          | 2       | 3       |
|          | 1        |          | 2        | 1        | 1        | 1        | 1        |          | 2        | 1        |          | 1        |          | 2       |         |
|          |          | 2        | 2        |          |          |          |          |          | 3        | 1        | 1        | 2        | 1        | 2       |         |
|          |          |          |          |          |          |          |          |          |          | 1        |          |          |          |         |         |
|          | 3        | 1        |          | 2        | 1        |          | 3        | 2        | 2        | 1        |          | 2        | 2        |         | 3       |
|          |          |          |          | 1        |          |          | 1        | 2        | 1        |          | 2        |          |          | 1       | 1       |
|          |          |          |          |          |          |          |          |          | 1        |          |          |          |          |         |         |
| 1        | 1        | 4        |          | 1        |          |          |          | 2        |          | 1        |          |          |          |         |         |
|          |          |          |          | 1        |          |          |          |          |          |          |          | 1        |          |         |         |
| 2        | 2        |          | 3        | 3        | 3        | 2        |          | 1        | 1        |          |          |          | 2        |         |         |
|          | 5        | 1        | 6        | 10       | 6        | 5        |          | 2        | 5        | 2        |          | 1        | 3        | 1       | 2       |
|          |          |          | 1        | 1        |          |          |          |          |          |          |          |          |          |         |         |
|          |          | 1        | 1        |          |          | 1        |          |          | 4        | 1        |          |          |          |         |         |
|          |          |          |          |          | 1        |          | 1        |          |          |          |          |          | 1        |         |         |
| 1        |          |          | 1        | 1        |          | 2        | 1        |          | 1        | 1        |          |          |          | 1       | 1       |
|          |          |          |          |          |          |          |          |          |          |          |          | 1        |          |         |         |
| 1        |          | 1        |          | 1        |          |          |          | 1        | 1        |          |          |          |          |         |         |
| 5        |          |          | 1        |          |          | 1        |          |          |          | 2        |          |          |          | 1       |         |
|          | 1        |          | 1        |          |          |          |          |          |          |          |          |          |          |         |         |
|          |          |          |          | 1        |          |          |          |          |          | 1        | 1        |          |          |         |         |
|          | 2        |          |          | 1        |          |          |          | 1        |          | 1        | 1        |          | 1        | 1       |         |
|          |          |          |          |          |          | 1        |          |          |          |          |          |          |          |         |         |
|          |          | 1        |          |          |          |          |          |          |          |          |          |          |          |         | 1       |
|          |          |          | 1        | 1        |          |          |          |          |          |          |          |          |          |         |         |
|          |          |          |          |          |          |          |          |          |          |          |          |          |          |         |         |
|          |          |          |          |          |          |          |          |          |          |          |          |          |          |         |         |
|          |          |          |          |          |          |          |          |          |          |          |          |          |          |         |         |
|          | 3        | 2        |          |          |          | 2        |          | 1        |          | 1        |          | 1        |          |         |         |
| 1        |          |          |          |          |          |          |          | 1        |          |          |          |          |          |         |         |
|          |          | 1        |          | 2        | 1        |          |          |          |          |          | 1        |          | 1        |         |         |
|          | 2        |          |          | 1        | 5        | 1        |          |          | 19       | 2        | 5        | 1        |          | 2       | 15      |
|          |          |          | 2        | 1        |          | 3        |          | 1        |          | 1        | 1        |          |          |         |         |
| 1        |          | 1        |          |          | 2        | 1        | 1        | 1        |          | 2        |          |          |          |         |         |
| 2        | 2        | 1        | 1        | 2        |          | 1        | 1        | 4        | 2        | 2        | 3        | 2        |          |         | 7       |
| 2        | 2        | 1        | 1        | 2        |          | 1        | 1        | 4        | 2        | 2        | 3        | 2        |          |         | 7       |
|          |          |          | 1        | 1        |          | 2        | 1        | 1        |          | 1        |          | 1        | 2        | 1       |         |
|          |          |          |          |          |          | 1        |          |          |          |          |          |          |          |         |         |
| 2        | 1        |          | 1        |          | 1        | 1        | 1        | 2        |          | 1        |          |          | 1        |         |         |
| 1        |          |          |          |          |          |          |          |          |          |          | 1        |          |          |         |         |
|          |          |          |          |          |          |          |          |          |          |          |          | 1        |          | 1       |         |
| 1        |          | 1        | 1        |          |          |          |          |          |          | 1        |          | 2        |          | 1       | 1       |
|          |          |          |          |          |          |          |          |          |          |          |          |          |          |         |         |
| 1        |          | 2        | 1        | 1        |          | 2        |          |          |          |          | 2        |          | 1        |         |         |
|          |          |          |          |          |          | 1        |          |          |          |          |          |          | 1        |         |         |
| 2        | 1        |          |          |          |          | 2        |          |          |          | 1        |          | 1        | 1        |         |         |
| 1        | 2        |          |          | 2        |          |          |          | 1        | 1        |          |          |          |          |         |         |
|          | 1        |          |          |          |          | 1        |          |          |          |          | 1        |          |          |         |         |
|          |          |          |          |          |          |          |          |          |          |          |          | 1        |          |         |         |
|          |          |          | 1        | 1        | 3        |          |          |          |          | 1        | 1        |          |          |         |         |
| 1        |          | 2        | 2        | 1        | 1        |          |          |          |          | 1        | 1        |          | 1        | 2       | 2       |
|          |          |          |          |          |          |          |          |          |          |          |          |          |          |         |         |
|          |          |          | 1        |          | 2        |          |          |          | 3        | 1        |          |          |          |         | 1       |
|          |          |          |          |          |          |          | 1        |          |          |          |          |          |          |         |         |
|          | 1        |          |          |          |          |          |          |          |          |          |          |          |          |         | 1       |
| 5        | 5        | 1        | 3        | 9        | 5        |          |          | 2        | 2        |          |          | 1        | 1        |         | 1       |
|          |          |          |          |          |          |          |          |          | 1        |          |          |          |          |         |         |
|          |          |          |          |          |          |          |          |          |          |          |          |          |          |         |         |
|          |          | 2        | 2        |          |          |          |          |          | 3        | 1        | 1        | 2        | 2        | 2       |         |
| 10       | 14       | 21       | 21       | 5        | 8        | 17       | 21       | 18       | 9        | 9        | 15       | 10       | 11       | 15      | 21      |
| 28       | 24       | 28       | 25       | 28       | 24       | 27       | 25       | 43       | 26       | 18       | 9        | 4        | 36       | 26      | 4       |

**References cited in this table:**

- Gilmartin PM, Sarokin L, Memelink J, Chua NH: Molecular light switches for plant genes. *Plant Cell* 1990, 2:369-378.
- Villain P, Mache R, Zhou DX: The mechanism of GT element-mediated cell type-specific transcriptional control. *J Biol Chem* 1996, 271:32593-32598.
- Ogawa M, Hanada A, Yamauchi Y, Kuwahara A, Kamiya Y, Yamaguchi S: Gibberellin biosynthesis and response during Arabidopsis seed germination. *Plant Cell* 2003, 15:1591-1604.
- Terzaghi WB, Cashmore AR: Light-regulated transcription. *Annu Rev Plant Physiol Plant Mol Biol* 1995, 46:445-474.
- Yamaguchi-Shinozaki K, Shinozaki K: Arabidopsis DNA encoding two desiccation-responsive rd29 genes. *Plant Physiol* 1993, 101:1119-1120.
- Simpson SD, Nakashima K, Narusaka Y, Seki M, Shinozaki K, Yamaguchi-Shinozaki K: Two different novel cis-acting elements of *erd1*, a *clpA* homologous Arabidopsis gene function in induction by dehydration stress and dark-induced senescence. *Plant J* 2003, 33:259-270.
- Baker SS, Wilhelm KS, Thomashow MF: The 5'-region of Arabidopsis thaliana core15a has cis-acting elements that confer cold-, drought- and ABA-regulated gene expression. *Plant Mol Biol* 1994, 24:701-713.

8. Diaz-De-Leon F, Klotz KL, Lagrimini M: Nucleotide sequence of the tobacco (*Nicotiana tabacum*) anionic peroxidase gene. *Plant Physiol* 1993, 101:1117-1118.
9. Pichersky E, Bernatzky R, Tanksley SD, Breidenbach RB, Kausch AP, Cashmore AR: Molecular characterization and genetic mapping of two clusters of genes encoding chlorophyll a/b-binding proteins in *Lycopersicon esculentum* (tomato). *Gene* 1985, 40:247-258.
10. Sommer H, Saedler H: Structure of the chalcone synthase gene of *Antirrhinum majus*. *Mol Gen Genet* 1986, 202:429-434.
11. Werneke JM, Chatfield JM, Ogren WL: Alternative mRNA splicing generates the two ribulosebiphosphate carboxylase/oxygenase activase polypeptides in spinach and *Arabidopsis*. *Plant Cell* 1989, 1:815-825.
12. Lois R, Dietrich A, Hahlbrock K, Schulz W: A phenylalanine ammonia-lyase gene from parsley: structure, regulation and identification of elicitor and light responsive cis-acting elements. *EMBO J* 1989, 8:1641-1648.
13. Manjunath S, Sachs MM: Molecular characterization and promoter analysis of the maize cytosolic glyceraldehyde 3-phosphate dehydrogenase gene family and its expression during anoxia. *Plant Mol Biol* 1997, 33:97-112.
14. Daraselia ND, Tarchevskaya S, Narita JO: The promoter for tomato 3-hydroxy-3-methylglutaryl coenzyme A reductase gene 2 has unusual regulatory elements that direct high-level expression. *Plant Physiol* 1996, 112:727-733.
15. Feldbrugge M, Sprenger M, Dinkelbach M, Yazaki K, Harter K, Weisshaar B: Functional analysis of a light-responsive plant bZIP transcriptional regulator. *Plant Cell* 1994, 6:1607-1621.
16. Rushton PJ, Torres JT, Parniske M, Wernert P, Hahlbrock K, Somssich I.E: Interaction of elicitor-induced DNA-binding proteins with elicitor response elements in the promoters of parsley PR1 genes. *EMBO J* 1996, 15:5690-5700.
17. Diaz-De-Leon F, Klotz KL, Lagrimini M: Nucleotide sequence of the tobacco (*Nicotiana tabacum*) anionic peroxidase gene. *Plant Physiol* 1993, 101:1117-1118.
18. Hartings H, Lazzaroni N, Marsan PA, Aragay A, Thompson R, Salamini F, Di Fonzo N, Palau J, Motto M: The b-32 protein from maize endosperm: characterization of genomic sequences encoding two alternative central domains. *Plant Mol Biol* 1990, 14:1031-1040.
19. Conley TR, Park SC, Kwon HB, Peng HS, Shih MC: Characterization of cis-acting elements in light regulation of the nuclear gene encoding the A subunit of chloroplast isozymes of glyceraldehyde-3-phosphate dehydrogenase from *Arabidopsis thaliana*. *Mol Cell Biol* 1994, 14:2525-2533.
20. Bichler J, Herrmann RG: Analysis of the promoters of the single-copy genes for plastocyanin and subunit delta of the chloroplast ATP synthase from spinach. *Eur J Biochem* 1990, 190:415-426.
21. Pastuglia M, Roby D, Dumas C, Cock JM: Rapid induction by wounding and bacterial infection of an S gene family receptor-like kinase in *Brassica oleracea*. *Plant Cell* 1997, 9:1-13.
22. Kim JK, Cao J, Wu R: Regulation and interaction of multiple protein factors with the proximal promoter regions of a rice high pI alpha-amylase gene. *Mol Gen Genet* 1992, 232:383-393.
23. Kuhlemeier C, Cuozzo M, Green PJ, Goyvaerts E, Ward K, Chua NH: Localization and conditional redundancy of regulatory elements in *rbcS-3A*, a pea gene encoding the small subunit of ribulose-bisphosphate carboxylase. *Proc Natl Acad Sci USA* 1988, 85:4662-4666.
24. Pastuglia M, Roby D, Dumas C, Cock JM: Rapid induction by wounding and bacterial infection of an S gene family receptor-like kinase in *Brassica oleracea*. *Plant Cell* 1997, 9:1-13.
25. Kim SY, Wu R: Multiple protein factors bind to a rice glutelin promoter region. *Nucleic Acids Res* 1990, 18:6845-6852.
26. Grandbastien MA, Berry-Lowe SL, Shirley BW, Meagher RB: Two soybean ribulose-1,5-bisphosphate carboxylase small subunit genes share extensive homology even in distant flanking sequences. *Plant Mol Biol* 1986, 7:451-465.
27. Kwon HB, Park SC, Peng HP, Goodman HM, Dewdney J, Shih MC: Identification of a light-responsive region of the nuclear gene encoding the B subunit of chloroplast glyceraldehyde 3-phosphate dehydrogenase from *Arabidopsis thaliana*. *Plant Physiol* 1994, 105:357-367.
28. Itzhaki H, Woodson WR: Characterization of an ethylene-responsive glutathione S-transferase gene cluster in carnation. *Plant Mol Biol* 1993, 22:43-58.
