# Supplementary material for: Non-specific lipid transfer proteins in maize
Source: PubMed Central journal article supplement (PMC4226865; doi:10.1186/s12870-014-0281-8), 2014-10-28
Supplement: 12870_2014_281_MOESM15_ESM.pdf [file 12870_2014_281_MOESM15_ESM.pdf]

**Table S11.** The probe sets of ZmLTP genes on the maize 18k GeneChip in this study.

| <b>Gene ID</b> | <b>Name</b> | <b>Probe Set ID</b> | <b>Match</b> |
|----------------|-------------|---------------------|--------------|
| GRMZM2G126397  | ZmLTP1.1    | Zm.7127.1.A1_at     | 15/15        |
| GRMZM2G010868  | ZmLTP1.2    | Zm.714.1.A1_at      | 15/15        |
| GRMZM2G107839  | ZmLTP1.3    | Zm.4168.1.A1_at     | 15/15        |
| GRMZM2G096234  | ZmLTP1.4    | Zm.3909.1.A1_at     | 15/15        |
| GRMZM2G101958  | ZmLTP1.6a   | Zm.2085.1.S1_s_at   | 15/15        |
| GRMZM2G101958  | ZmLTP1.6b   | Zm.19.2.S1_x_at     | 10/15        |
| GRMZM5G898755  | ZmLTP1.7    | Zm.16488.1.A1_at    | 15/15        |
| GRMZM2G137329  | ZmLTP2.1    | Zm.930.1.A1_at      | 15/15        |
| GRMZM2G406552  | ZmLTP2.3    | Zm.11801.1.S1_at    | 15/15        |
| GRMZM2G387360  | ZmLTP2.4    | Zm.17087.1.S1_at    | 15/15        |
| GRMZM2G403007  | ZmLTP2.6    | Zm.13789.1.A1_at    | 9/15         |
| GRMZM2G004909  | ZmLTP2.7    | Zm.8222.1.A1_at     | 8/15         |
| GRMZM2G320373  | ZmLTP2.8    | Zm.17726.1.A1_at    | 8/15         |
| GRMZM2G393150  | ZmLTP2.9    | Zm.9640.1.A1_at     | 15/15        |
| GRMZM2G073377  | ZmLTPc2     | Zm.10322.1.S1_at    | 11/15        |
| GRMZM2G031102  | ZmLTPd1     | Zm.3374.1.S1_at     | 10/15        |
| GRMZM2G071771  | ZmLTPd2     | Zm.11586.1.A1_at    | 15/15        |
| GRMZM2G136364  | ZmLTPd3     | Zm.16476.1.A1_at    | 15/15        |
| GRMZM2G099867  | ZmLTPd4     | Zm.3374.1.S1_at     | 10/15        |
| GRMZM2G164440  | ZmLTPd5     | Zm.1090.2.A1_a_at   | 15/15        |
| GRMZM2G087413  | ZmLTPd6     | Zm.253.1.A1_at      | 14/15        |
| GRMZM2G065557  | ZmLTPd8     | Zm.4529.1.A1_a_at   | 15/15        |
| GRMZM2G094632  | ZmLTPd9     | Zm.3825.1.A1_at     | 15/15        |
| GRMZM2G170969  | ZmLTPd13a   | Zm.4302.2.A1_x_at   | 15/15        |
| GRMZM2G170969  | ZmLTPd13b   | Zm.4302.2.A1_a_at   | 15/15        |
| GRMZM2G170969  | ZmLTPd13c   | Zm.4302.1.A1_x_at   | 11/15        |
| GRMZM2G091054  | ZmLTPd14    | Zm.8180.1.S1_at     | 14/15        |
| GRMZM5G850455  | ZmLTPg1     | Zm.5674.1.S1_at     | 15/15        |
| GRMZM2G078876  | ZmLTPg3     | Zm.1503.2.S1_at     | 15/15        |
| GRMZM2G083725  | ZmLTPg4     | ZmAffx.191.1.A1_at  | 15/15        |
| GRMZM2G005991  | ZmLTPg7a    | Zm.3313.1.A1_a_at   | 11/15        |
| GRMZM2G005991  | ZmLTPg7b    | Zm.3313.2.A1_x_at   | 9/15         |
| GRMZM2G005991  | ZmLTPg7c    | Zm.3313.1.A1_x_at   | 7/15         |
| GRMZM2G168833  | ZmLTPg9     | Zm.2246.1.A1_at     | 14/15        |
| GRMZM2G130454  | ZmLTPg16    | Zm.3724.3.A1_a_at   | 15/15        |
| GRMZM2G141858  | ZmLTPg17    | Zm.1477.1.S1_at     | 15/15        |
| GRMZM2G116167  | ZmLTPg18    | Zm.1046.1.S1_at     | 15/15        |
| GRMZM2G089400  | ZmLTPg19    | Zm.14674.1.S1_at    | 15/15        |
| GRMZM2G089288  | ZmLTPg20    | Zm.2305.1.S1_at     | 15/15        |
| GRMZM2G170044  | ZmLTPg22    | Zm.10158.1.A1_at    | 15/15        |
| GRMZM2G171597  | ZmLTPg23    | Zm.16112.1.S1_at    | 13/15        |
