# Supplementary material for: Non-specific lipid transfer proteins in maize
Source: PubMed Central journal article supplement (PMC4226865; doi:10.1186/s12870-014-0281-8), 2014-10-28

**log<sub>2</sub>-fold change**

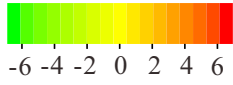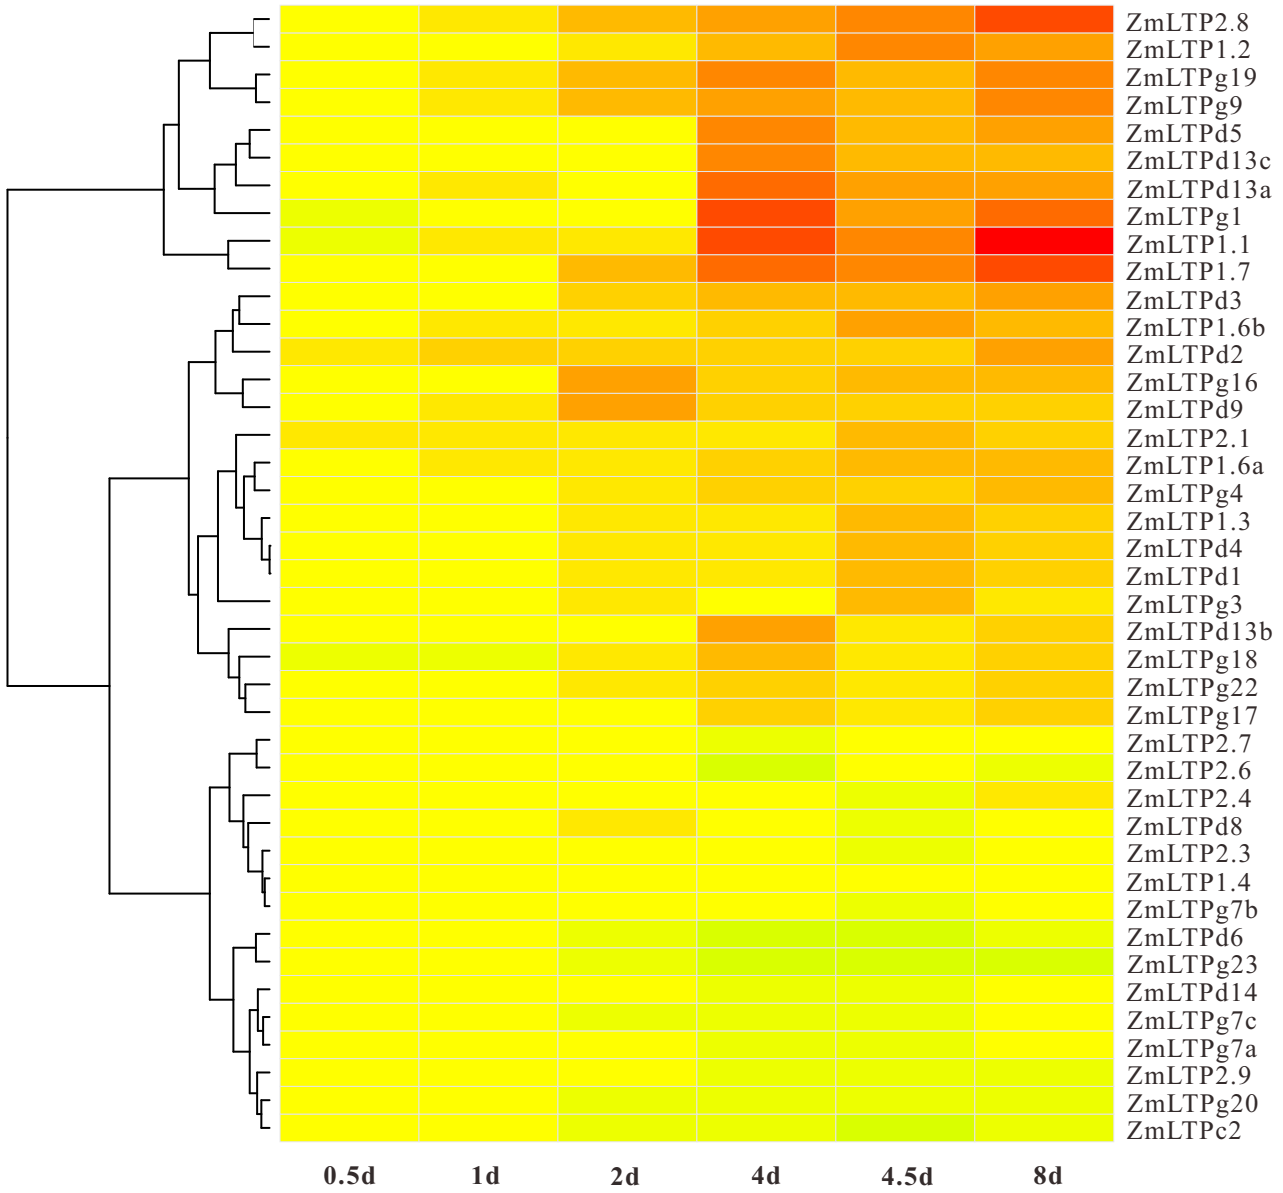

Supplement: 12870_2014_281_MOESM16_ESM.pdf [file 12870_2014_281_MOESM16_ESM.pdf]
