# Supplementary material for: Non-specific lipid transfer proteins in maize
Source: PubMed Central journal article supplement (PMC4226865; doi:10.1186/s12870-014-0281-8), 2014-10-28
Supplement: 12870_2014_281_MOESM17_ESM.pdf [file 12870_2014_281_MOESM17_ESM.pdf]

**Table S12.** Primers used for real time PCR analysis.

| <b>Gene name</b> | <b>Forward primer</b>      | <b>Reverse primer</b>      |
|------------------|----------------------------|----------------------------|
| <i>ZmLTP2.4</i>  | 5' GCGATCATCAGCGGGTC 3'    | 5' CGTTGGGGCTGTTGATGTAG 3' |
| <i>ZmLTP2.6</i>  | 5' CCATCATCATCGGGAGGTCG 3' | 5' GAGTTGACGTAGCGCTGAAG 3' |
| <i>ZmLTP2.8</i>  | 5' GTGTCGCGCTGTTCCCTGG 3'  | 5' GCTGGGGTTCCTCTGTACT 3'  |
| <i>ZmLTPd2</i>   | 5' GTCTGCAACCTGTCGAGC 3'   | 5' TGAGAACCTCACCCACACG 3'  |
| <i>ZmLTPd8</i>   | 5' CTTCGCGGGGCTGGATAC 3'   | 5' TTGGGGATGGTCATGGCC 3'   |
| <i>ZmLTPd9</i>   | 5' GGACTGCTGCAAACCATCA 3'  | 5' CAGTCCTGCTTTGATCCGC 3'  |
| <i>ZmLTPg16</i>  | 5' GTGCCTCAACTACATCAGCG 3' | 5' GCGTCCTGTCGATGGTGA 3'   |
| <i>ZmLTPg18</i>  | 5' CTGCATCTTCAGCTCCACC 3'  | 5' GCCCACCACCAGATGAAACT 3' |
