# Supplementary material for: Non-specific lipid transfer proteins in maize
Source: PubMed Central journal article supplement (PMC4226865; doi:10.1186/s12870-014-0281-8), 2014-10-28
Supplement: 12870_2014_281_MOESM18_ESM.pdf [file 12870_2014_281_MOESM18_ESM.pdf]

**Table S13.** List of FPKM values of 42 ZmLTP genes in maize reproductive (ovary) and vegetative tissue (leaf) under both drought and well-watered conditions.

MCC and MCD stand for maize ovary, well watered and drought, respectively; MLC and MLD stand for maize basal leaf meristem, well watered and drought, respectively.

Numbers 1 and 2 indicate the two biological replicates.

The extent of differential expression is measured in terms of fold change and (-) indicates failure to calculate or undetected values.

Values in red and blue indicate the fold increase and decrease in expression in the drought-stressed tissue, respectively.

| Name     | Gene ID       | MCC.1    | MCC.2    | Average  | MCD.1    | MCD.2    | Average  | Ovaries<br>(Fold Change) | Name     | Gene ID          | MLC.1    | MLC.2    | Average   | MLD.1    | MLD.2    | Average   | Leaf<br>(Fold Change) |
|----------|---------------|----------|----------|----------|----------|----------|----------|--------------------------|----------|------------------|----------|----------|-----------|----------|----------|-----------|-----------------------|
| ZmLTP2.8 | GRMZM2G320373 | 10.426   | 8.22402  | 9.32501  | 293.913  | 176.666  | 235.2895 | 25.2320                  | ZmLTPd3  | GRMZM2G136364    | 98.5154  | 32.6996  | 65.6075   | 226.254  | 468.784  | 347.519   | 5.2969                |
| ZmLTPg14 | GRMZM2G071575 | 9.68297  | 16.8128  | 13.24789 | 61.5871  | 103.104  | 82.34555 | 6.2158                   | ZmLTP2.8 | GRMZM2G320373    | 23.0335  | 10.6743  | 16.8539   | 39.3189  | 86.4044  | 62.86165  | 3.7298                |
| ZmLTP2.2 | GRMZM2G081464 | 1.17237  | 0.748169 | 0.96027  | 3.5746   | 1.58045  | 2.577525 | 2.6842                   | ZmLTPd4  | GRMZM2G099867    | 10.7975  | 2.7424   | 6.76995   | 12.1264  | 35.7739  | 23.95015  | 3.5377                |
| ZmLTPd4  | GRMZM2G099867 | 2.14948  | 0.981653 | 1.565567 | 4.88947  | 0.547447 | 2.718459 | 1.7364                   | ZmLTPd1  | GRMZM2G031102    | 10.6147  | 2.69596  | 6.65533   | 11.9211  | 35.1681  | 23.5446   | 3.5377                |
| ZmLTPd1  | GRMZM2G031102 | 2.11308  | 0.96503  | 1.539055 | 4.80667  | 0.538177 | 2.672424 | 1.7364                   | ZmLTP2.6 | GRMZM2G403007    | 0.895399 | 0.06069  | 0.4780445 | 1.40634  | 1.94226  | 1.6743    | 3.5024                |
| ZmLTPc2  | GRMZM2G073377 | 1.56115  | 1.01596  | 1.288555 | 0.980828 | 2.97719  | 1.979009 | 1.5358                   | ZmLTPg2  | GRMZM2G174680    | 1.6429   | 1.15136  | 1.39713   | 4.15883  | 5.15967  | 4.65925   | 3.3349                |
| ZmLTP2.6 | GRMZM2G403007 | 20.1625  | 24.8437  | 22.5031  | 0.39234  | 0.198247 | 0.295294 | 76.2060                  | ZmLTP1.1 | GRMZM2G126397    | 43.3601  | 5.88486  | 24.62248  | 42.5902  | 111.67   | 77.1301   | 3.1325                |
| ZmLTP2.1 | GRMZM2G137329 | 20.9869  | 53.3202  | 37.15355 | 1.43846  | 0.464549 | 0.951505 | 39.0470                  | ZmLTPg3  | GRMZM2G078876    | 30.2099  | 19.885   | 25.04745  | 64.7171  | 63.4785  | 64.0978   | 2.5591                |
| ZmLTP1.2 | GRMZM2G010868 | 595.094  | 1436.18  | 1015.637 | 43.0125  | 36.1625  | 39.5875  | 25.6550                  | ZmLTPg1  | GRMZM5G850455    | 3.75822  | 3.0752   | 3.41671   | 7.42871  | 9.44568  | 8.437195  | 2.4694                |
| ZmLTP1.1 | GRMZM2G126397 | 1342.75  | 1562.15  | 1452.45  | 95.4805  | 59.8011  | 77.6408  | 18.7070                  | ZmLTPd5  | GRMZM2G164440    | 25.2971  | 39.8123  | 32.5547   | 58.0493  | 75.1908  | 66.62005  | 2.0464                |
| ZmLTPg9  | GRMZM2G168833 | 3.19474  | 4.07053  | 3.632635 | 0.239117 | 0.202985 | 0.221051 | 16.4335                  | ZmLTP1.5 | GRMZM2G025026    | 1.27297  | 0.214966 | 0.743968  | 1.39798  | 1.15311  | 1.275545  | 1.7145                |
| ZmLTPg6  | GRMZM2G006047 | 5.36824  | 7.43594  | 6.40209  | 0.359445 | 0.443662 | 0.401554 | 15.9430                  | ZmLTP1.2 | GRMZM2G010868    | 1156.78  | 330.585  | 743.6825  | 1042.53  | 1330.33  | 1186.43   | 1.5953                |
| ZmLTPg24 | GRMZM2G379035 | 48.1625  | 51.1694  | 49.66595 | 3.98622  | 3.2204   | 3.60331  | 13.7830                  | ZmLTP2.7 | GRMZM2G004909    | 128.523  | 72.6659  | 100.59445 | 146.805  | 167.643  | 157.224   | 1.5629                |
| ZmLTPg21 | GRMZM2G046750 | 2.39596  | 1.93677  | 2.166365 | 0.539786 | 0.122738 | 0.331262 | 6.5397                   | ZmLTP1.3 | GRMZM2G107839    | 2207.42  | 689.465  | 1448.4425 | 1911.63  | 2503.43  | 2207.53   | 1.5241                |
| ZmLTPg1  | GRMZM5G850455 | 184.23   | 207.755  | 195.9925 | 33.3676  | 26.5791  | 29.97335 | 6.5389                   | ZmLTPg19 | GRMZM2G089400    | 11.3913  | 8.56868  | 9.97999   | 13.4208  | 14.3896  | 13.9052   | 1.3933                |
| ZmLTPg3  | GRMZM2G078876 | 176.717  | 208.607  | 192.662  | 29.2066  | 29.9628  | 29.5847  | 6.5122                   | ZmLTPg22 | GRMZM2G170044    | 67.4672  | 24.2184  | 45.8428   | 52.8522  | 73.1059  | 62.97905  | 1.3738                |
| ZmLTPg2  | GRMZM2G174680 | 6.97953  | 10.3239  | 8.651715 | 2.00723  | 1.43356  | 1.720395 | 5.0289                   | ZmLTPd8  | GRMZM2G065557    | 9.94042  | 10.1019  | 10.02116  | 9.41453  | 14.1537  | 11.784115 | 1.1759                |
| ZmLTPg17 | GRMZM2G141858 | 56.2329  | 63.9697  | 60.1013  | 12.3026  | 17.8129  | 15.05775 | 3.9914                   | ZmLTPd10 | AC233926.1_FG002 | 37.4067  | 26.9737  | 32.1902   | 41.5912  | 29.5362  | 35.5637   | 1.1048                |
| ZmLTPd9  | GRMZM2G094632 | 11.0245  | 10.6958  | 10.86015 | 2.95937  | 3.5894   | 3.274385 | 3.3167                   | ZmLTPg17 | GRMZM2G141858    | 27.0536  | 18.9292  | 22.9914   | 23.715   | 26.1727  | 24.94385  | 1.0849                |
| ZmLTPg19 | GRMZM2G089400 | 16.672   | 17.0799  | 16.87595 | 5.23999  | 5.11543  | 5.17771  | 3.2593                   | ZmLTPg25 | GRMZM2G004466    | 22.973   | 22.0804  | 22.5267   | 23.6736  | 23.6156  | 23.6446   | 1.0496                |
| ZmLTPg16 | GRMZM2G130454 | 3.44783  | 4.29984  | 3.873835 | 1.0493   | 1.33798  | 1.19364  | 3.2454                   | ZmLTP2.9 | GRMZM2G393150    | 0.593746 | 0.845037 | 0.7193915 | 0.381498 | 0.210728 | 0.296113  | 2.4294                |
| ZmLTPd3  | GRMZM2G136364 | 14.2103  | 13.8827  | 14.0465  | 8.36008  | 0.513462 | 4.436771 | 3.1659                   | ZmLTPg24 | GRMZM2G379035    | 8.41691  | 0        | 8.41691   | 3.01347  | 5.1377   | 4.075585  | 2.0652                |
| ZmLTPg5  | GRMZM2G097137 | 1.00325  | 0.586983 | 0.795117 | 0.211924 | 0.428934 | 0.320429 | 2.4814                   | ZmLTPd11 | GRMZM2G000221    | 34.5622  | 11.3914  | 22.9768   | 20.9225  | 4.41849  | 12.670495 | 1.8134                |
| ZmLTPd12 | GRMZM2G471051 | 0.702159 | 0.983819 | 0.842989 | 0.650837 | 0.287756 | 0.469297 | 1.7963                   | ZmLTPg10 | GRMZM2G414620    | 0.451229 | 0.76671  | 0.6089695 | 0.371987 | 0.320803 | 0.346395  | 1.7580                |
| ZmLTPg10 | GRMZM2G414620 | 0.847816 | 0.277165 | 0.562491 | 0.351432 | 0        | 0.351432 | 1.6006                   | ZmLTPg18 | GRMZM2G116167    | 3.82673  | 0.101742 | 1.964236  | 0.837906 | 1.46976  | 1.153833  | 1.7024                |
| ZmLTPg4  | GRMZM2G083725 | 346.72   | 771.911  | 559.3155 | 357.561  | 454.026  | 405.7935 | 1.3783                   | ZmLTPg7  | GRMZM2G005991    | 2.94005  | 2.43093  | 2.68549   | 2.28582  | 1.00237  | 1.644095  | 1.6334                |
| ZmLTPd5  | GRMZM2G164440 | 57.0507  | 54.5583  | 55.8045  | 32.5263  | 51.9309  | 42.2286  | 1.3215                   | ZmLTPg6  | GRMZM2G006047    | 19.8552  | 16.8587  | 18.35695  | 17.5124  | 6.08085  | 11.796625 | 1.5561                |
| ZmLTP2.7 | GRMZM2G004909 | 5.39505  | 4.01455  | 4.7048   | 5.7845   | 1.54254  | 3.66352  | 1.2842                   | ZmLTPg16 | GRMZM2G130454    | 5.92326  | 3.69522  | 4.80924   | 5.12351  | 1.08849  | 3.106     | 1.5484                |
| ZmLTPg20 | GRMZM2G089288 | 5.96294  | 5.88883  | 5.925885 | 3.01775  | 6.73541  | 4.87658  | 1.2152                   | ZmLTPg21 | GRMZM2G046750    | 8.18335  | 7.51481  | 7.84908   | 8.41245  | 1.96057  | 5.18651   | 1.5134                |
| ZmLTPg22 | GRMZM2G170044 | 8.03274  | 6.02072  | 7.02673  | 6.88194  | 5.5397   | 6.21082  | 1.1314                   | ZmLTPg13 | GRMZM2G176347    | 6.45889  | 4.34133  | 5.40011   | 5.60318  | 1.89512  | 3.74915   | 1.4404                |
| ZmLTP1.3 | GRMZM2G107839 | 261.266  | 559.841  | 410.5535 | 0        | 0        | 0        | -                        | ZmLTPg5  | GRMZM2G097137    | 3.19798  | 1.96057  | 2.579275  | 2.80344  | 0.788911 | 1.7961755 | 1.4360                |
| ZmLTPd13 | GRMZM2G170969 | 118.475  | 45.6443  | 82.05965 | 0        | 0        | 0        | -                        | ZmLTPg9  | GRMZM2G168833    | 179.275  | 96.4799  | 137.87745 | 111.426  | 89.6491  | 100.53755 | 1.3714                |
| ZmLTPg18 | GRMZM2G116167 | 151.749  | 170.997  | 161.373  | 0        | 0        | 0        | -                        | ZmLTPg14 | GRMZM2G071575    | 3.66903  | 2.20221  | 2.93562   | 2.55683  | 1.79477  | 2.1758    | 1.3492                |
|          |               |          |          |          |          |          |          |                          | ZmLTPg4  | GRMZM2G083725    | 161.271  | 100.659  | 130.965   | 123.116  | 103.977  | 113.5465  | 1.1534                |
|          |               |          |          |          |          |          |          |                          | ZmLTPd9  | GRMZM2G094632    | 6.11464  | 4.13128  | 5.12296   | 4.58564  | 4.76498  | 4.67531   | 1.0957                |
|          |               |          |          |          |          |          |          |                          | ZmLTPd2  | GRMZM2G071771    | 82.2042  | 56.1774  | 69.1908   | 80.5053  | 54.7451  | 67.6252   | 1.0232                |
