# Supplementary material for: Non-specific lipid transfer proteins in maize
Source: PubMed Central journal article supplement (PMC4226865; doi:10.1186/s12870-014-0281-8), 2014-10-28
Supplement: 12870_2014_281_MOESM20_ESM.pdf [file 12870_2014_281_MOESM20_ESM.pdf]

**Table S14.** The probe sets of ZmLTP genes on the maize 58k NSF array in this study.

| <b>Gene ID</b>   | <b>Name</b> | <b>Probe Set ID</b> | <b>Expect</b> | <b>Identities</b> |
|------------------|-------------|---------------------|---------------|-------------------|
| GRMZM2G126397    | ZmLTP1.1    | MZ00057079          | 0             | 100.00%           |
| GRMZM2G010868    | ZmLTP1.2    | MZ00056626          | 0             | 100.00%           |
| GRMZM2G107839    | ZmLTP1.3    | MZ00041203          | 0             | 100.00%           |
| GRMZM2G096234    | ZmLTP1.4    | MZ00001642          | 2.00E-99      | 91.90%            |
| GRMZM2G025026    | ZmLTP1.5    | MZ00024911          | 0             | 100.00%           |
| GRMZM2G101958    | ZmLTP1.6    | MZ00041611          | 1.00E-149     | 98.30%            |
| GRMZM5G898755    | ZmLTP1.7    | MZ00040001          | 0             | 100.00%           |
| GRMZM2G137329    | ZmLTP2.1    | MZ00026029          | 0             | 100.00%           |
| GRMZM2G081464    | ZmLTP2.2    | MZ00021772          | 1.00E-135     | 97.10%            |
| GRMZM2G387360    | ZmLTP2.4    | MZ00024305          | 0             | 100.00%           |
| GRMZM2G039383    | ZmLTP2.5    | MZ00048959          | 2.00E-86      | 100.00%           |
| GRMZM2G403007    | ZmLTP2.6    | MZ00028450          | 0             | 100.00%           |
| GRMZM2G393150    | ZmLTP2.9    | MZ00019363          | 0             | 99.90%            |
| AC225127.3_FG003 | ZmLTPc1     | MZ00023792          | 0             | 97.90%            |
| GRMZM2G073377    | ZmLTPc2     | MZ00044799          | 0             | 96.30%            |
| GRMZM2G071771    | ZmLTPd2     | MZ00031966          | 0             | 100.00%           |
| GRMZM2G136364    | ZmLTPd3a    | MZ00056914          | 1.00E-167     | 100.00%           |
| GRMZM2G136364    | ZmLTPd3b    | MZ00015921          | 1.00E-167     | 100.00%           |
| GRMZM2G087413    | ZmLTPd6     | MZ00015063          | 1.00E-177     | 99.10%            |
| GRMZM2G094632    | ZmLTPd9     | MZ00015293          | 0             | 97.90%            |
| GRMZM2G471051    | ZmLTPd12    | MZ00022218          | 0             | 100.00%           |
| GRMZM2G170969    | ZmLTPd13    | MZ00041900          | 0             | 100.00%           |
| GRMZM5G850455    | ZmLTPg1     | MZ00023652          | 0             | 99.40%            |
| GRMZM2G006047    | ZmLTPg6     | MZ00057049          | 0             | 100.00%           |
| GRMZM2G168833    | ZmLTPg9     | MZ00029700          | 0             | 93.30%            |
| GRMZM2G414620    | ZmLTPg10    | MZ00021034          | 0             | 99.20%            |
| GRMZM2G151021    | ZmLTPg11    | MZ00051921          | 0             | 100.00%           |
| GRMZM2G071575    | ZmLTPg14    | MZ00046275          | 0             | 100.00%           |
| GRMZM2G130454    | ZmLTPg16    | MZ00030532          | 1.00E-179     | 100.00%           |
| GRMZM2G141858    | ZmLTPg17a   | MZ00025985          | 0             | 99.90%            |
| GRMZM2G141858    | ZmLTPg17b   | MZ00043905          | 0             | 100.00%           |
| GRMZM2G089400    | ZmLTPg19    | MZ00018623          | 0             | 98.10%            |
| GRMZM2G089288    | ZmLTPg20    | MZ00015331          | 0             | 98.90%            |
| GRMZM2G170044    | ZmLTPg22    | MZ00019645          | 0             | 99.80%            |
| GRMZM2G171597    | ZmLTPg23    | MZ00044499          | 0             | 99.00%            |
| GRMZM2G379035    | ZmLTPg24    | MZ00057310          | 0             | 100.00%           |
| GRMZM2G036063    | ZmLTPx1.3   | MZ00051527          | 0             | 100.00%           |
