# Supplementary material for: Non-specific lipid transfer proteins in maize
Source: PubMed Central journal article supplement (PMC4226865; doi:10.1186/s12870-014-0281-8), 2014-10-28
Supplement: 12870_2014_281_MOESM21_ESM.pdf [file 12870_2014_281_MOESM21_ESM.pdf]

**Table S7.** Syntenic sites harboring nsLTP genes in maize, sorghum and rice.

| Block ID | Gene     | Chr | Start     | End       | Gene     | Chr | Start     | End       |
|----------|----------|-----|-----------|-----------|----------|-----|-----------|-----------|
| 33       | ZmLTPg6  | 1   | 287110656 | 287111891 | ZmLTPg16 | 5   | 4429841   | 4431021   |
| 93       | ZmLTPg11 | 2   | 47422297  | 47424522  | ZmLTPx2  | 10  | 118762389 | 118764275 |
| 261      | ZmLTPg13 | 2   | 233632142 | 233633151 | ZmLTPg21 | 7   | 9201072   | 9202357   |
| 269      | ZmLTPd7  | 3   | 162372093 | 162372586 | ZmLTPd13 | 8   | 162756043 | 162756672 |
| 246      | ZmLTP2.7 | 6   | 162646836 | 162647576 | ZmLTP2.9 | 8   | 152130321 | 152131030 |
| 36       | OsLTP1.1 | 1   | 6541005   | 6543076   | ZmLTP1.4 | 8   | 25946151  | 25947246  |
| 43       | OsLTPd9  | 1   | 33906370  | 33909592  | ZmLTPd14 | 8   | 171565757 | 171566487 |
| 43       | OsLTPg1  | 1   | 34626184  | 34629997  | ZmLTPg24 | 8   | 171016014 | 171017268 |
| 11       | OsLTP1.2 | 1   | 35129858  | 35130917  | ZmLTP1.1 | 3   | 184434264 | 184435351 |
| 11       | OsLTPd5  | 1   | 36483566  | 36484818  | ZmLTPd8  | 3   | 179414637 | 179416401 |
| 44       | OsLTPd1  | 1   | 39836639  | 39837257  | ZmLTPd12 | 8   | 162752046 | 162752849 |
| 180      | OsLTPg5  | 3   | 15300737  | 15301156  | ZmLTPg23 | 7   | 167020090 | 167021470 |
| 134      | OsLTPg5  | 3   | 15300737  | 15301156  | ZmLTPg3  | 1   | 66023613  | 66026784  |
| 165      | OsLTPg5  | 3   | 15300737  | 15301156  | ZmLTPg12 | 2   | 212487102 | 212487524 |
| 135      | OsLTPg10 | 3   | 33563702  | 33566773  | ZmLTPg9  | 1   | 289786005 | 289788499 |
| 179      | OsLTPg10 | 3   | 33563702  | 33566773  | ZmLTPg22 | 7   | 16096163  | 16099019  |
| 207      | OsLTPd6  | 4   | 20534150  | 20535514  | ZmLTPd3  | 2   | 55687675  | 55688855  |
| 228      | OsLTP1.4 | 5   | 23508004  | 23509669  | ZmLTP1.1 | 3   | 184434264 | 184435351 |
| 327      | OsLTP1.6 | 6   | 20254443  | 20257626  | ZmLTP1.5 | 9   | 61863515  | 61865024  |
| 313      | OsLTPg13 | 6   | 28617447  | 28620321  | ZmLTPg19 | 6   | 89065818  | 89068077  |
| 292      | OsLTPg13 | 6   | 28617447  | 28620321  | ZmLTPg17 | 5   | 49545870  | 49548495  |
| 291      | OsLTPg24 | 6   | 30113940  | 30115510  | ZmLTPg18 | 5   | 59978801  | 59980128  |
| 348      | OsLTPg17 | 7   | 3976186   | 3977717   | ZmLTPg13 | 2   | 233632142 | 233633151 |
| 362      | OsLTPg17 | 7   | 3976186   | 3977717   | ZmLTPg21 | 7   | 9201072   | 9202357   |
| 334      | OsLTPg19 | 7   | 5313788   | 5318164   | ZmLTPg9  | 1   | 289786005 | 289788499 |
| 359      | OsLTPg19 | 7   | 5313788   | 5318164   | ZmLTPg22 | 7   | 16096163  | 16099019  |
| 361      | OsLTPd3  | 7   | 11090520  | 11091267  | ZmLTPd10 | 7   | 30954067  | 30954378  |
| 357      | OsLTPg21 | 7   | 25920677  | 25922871  | ZmLTPg23 | 7   | 167020090 | 167021470 |
| 343      | OsLTPg21 | 7   | 25920677  | 25922871  | ZmLTPg12 | 2   | 212487102 | 212487524 |
| 372      | OsLTPg22 | 8   | 26554150  | 26557081  | ZmLTPg4  | 1   | 194657095 | 194659202 |
| 396      | OsLTPg22 | 8   | 26554150  | 26557081  | ZmLTPg14 | 4   | 45262758  | 45263990  |
| 447      | OsLTPc2  | 9   | 20534165  | 20534954  | ZmLTPc2  | 7   | 141644107 | 141645776 |
| 46       | SbLTPx1  | 1   | 4463665   | 4464105   | ZmLTPg16 | 5   | 4429841   | 4431021   |
| 40       | SbLTPg4  | 1   | 4460355   | 4461248   | ZmLTPg13 | 2   | 233632142 | 233633151 |
| 47       | SbLTP2.1 | 1   | 18272382  | 18273147  | ZmLTP2.4 | 5   | 23838144  | 23838818  |
| 57       | SbLTPd1  | 1   | 43752841  | 43754087  | ZmLTPd9  | 5   | 39411646  | 39412902  |
| 58       | SbLTPg5  | 1   | 57231144  | 57233750  | ZmLTPg23 | 7   | 167020090 | 167021470 |
| 43       | SbLTPg5  | 1   | 57231144  | 57233750  | ZmLTPg12 | 2   | 212487102 | 212487524 |
| 63       | SbLTPg7  | 1   | 67453781  | 67454898  | ZmLTPg25 | 9   | 149245864 | 149247159 |
| 8        | SbLTPg6  | 1   | 60370302  | 60371426  | ZmLTPg2  | 1   | 52625970  | 52627201  |
| 172      | SbLTPg9  | 2   | 4685954   | 4687002   | ZmLTPg20 | 7   | 8901782   | 8904176   |
| 172      | SbLTPg10 | 2   | 4753198   | 4754293   | ZmLTPg21 | 7   | 9201072   | 9202357   |
| 153      | SbLTPg10 | 2   | 4753198   | 4754293   | ZmLTPg13 | 2   | 233632142 | 233633151 |
| 180      | SbLTPg12 | 2   | 7100123   | 7103454   | ZmLTPg22 | 7   | 16096163  | 16099019  |
| 176      | SbLTPd5  | 2   | 13351451  | 13352128  | ZmLTPd10 | 7   | 30954067  | 30954378  |
| 178      | SbLTPc1  | 2   | 65488459  | 65488989  | ZmLTPc2  | 7   | 141644107 | 141645776 |
| 171      | SbLTPg13 | 2   | 74005754  | 74008032  | ZmLTPg23 | 7   | 167020090 | 167021470 |
| 146      | SbLTPg13 | 2   | 210788762 | 212649098 | ZmLTPg12 | 2   | 212487102 | 212487524 |
| 237      | SbLTP1.1 | 3   | 1446324   | 1447200   | ZmLTP1.4 | 8   | 25946151  | 25947246  |
| 209      | SbLTP1.2 | 3   | 66219316  | 66220110  | ZmLTP1.1 | 3   | 184434264 | 184435351 |

|     |          |    |          |          |          |    |           |           |
|-----|----------|----|----------|----------|----------|----|-----------|-----------|
| 209 | SbLTPd9  | 3  | 67522375 | 67523472 | ZmLTPd8  | 3  | 179414637 | 179416401 |
| 235 | SbLTPd7  | 3  | 65227168 | 65227630 | ZmLTPd14 | 8  | 171565757 | 171566487 |
| 235 | SbLTPg15 | 3  | 65758095 | 65759880 | ZmLTPg24 | 8  | 171016014 | 171017268 |
| 234 | SbLTPd10 | 3  | 70899337 | 70899654 | ZmLTPd12 | 8  | 162752046 | 162752849 |
| 271 | SbLTPg16 | 4  | 53770386 | 53770992 | ZmLTPg15 | 4  | 126473476 | 126474249 |
| 391 | SbLTPd11 | 6  | 44576681 | 44577477 | ZmLTPd3  | 2  | 55687675  | 55688855  |
| 365 | SbLTPg18 | 6  | 46903482 | 46905662 | ZmLTPx2  | 10 | 118762389 | 118764275 |
| 383 | SbLTPg18 | 6  | 46903482 | 46905662 | ZmLTPg11 | 2  | 47422297  | 47424522  |
| 383 | SbLTPg19 | 6  | 48688841 | 48689610 | ZmLTPg10 | 2  | 41484533  | 41485576  |
| 421 | SbLTP1.3 | 7  | 2833270  | 2834356  | ZmLTP1.8 | 10 | 84608056  | 84608542  |
| 412 | SbLTPg21 | 7  | 61309583 | 61311559 | ZmLTPg4  | 1  | 194657095 | 194659202 |
| 438 | SbLTPg21 | 7  | 61309583 | 61311559 | ZmLTPg14 | 4  | 45262758  | 45263990  |
| 471 | SbLTP1.4 | 8  | 2779571  | 2780575  | ZmLTP1.6 | 10 | 4165442   | 4166593   |
| 486 | SbLTP1.4 | 8  | 2779571  | 2780575  | ZmLTP1.2 | 3  | 230606444 | 230608235 |
| 549 | SbLTPg22 | 9  | 53507894 | 53509662 | ZmLTPg24 | 8  | 171016014 | 171017268 |
| 564 | SbLTP2.5 | 9  | 56662520 | 56663221 | ZmLTP2.9 | 8  | 152130321 | 152131030 |
| 125 | SbLTP1.9 | 10 | 46718450 | 46719021 | ZmLTP1.5 | 9  | 61863515  | 61865024  |
| 107 | SbLTPg23 | 10 | 57671753 | 57674547 | ZmLTPg19 | 6  | 89065818  | 89068077  |
| 81  | SbLTPg23 | 10 | 57671753 | 57674547 | ZmLTPg17 | 5  | 49545870  | 49548495  |
| 105 | SbLTP2.7 | 10 | 59161545 | 59162227 | ZmLTP2.5 | 6  | 86281901  | 86282589  |
| 79  | SbLTPg24 | 10 | 59476463 | 59477591 | ZmLTPg18 | 5  | 59978801  | 59980128  |

---
