# Supplementary material for: Non-specific lipid transfer proteins in maize
Source: BMC Plant Biol. 2014 Oct 28;14:281. doi: 10.1186/s12870-014-0281-8 (PMC4226865; doi:10.1186/s12870-014-0281-8)
Supplement: Additional file 14: Table S10. — Average log2 signal intensity values and CV values of 75 detected ZmLTP transcripts in sixty distinct tissues representing eleven major organ systems of inbred line B73 ordered by three clusters. [file 12870_2014_281_MOESM14_ESM.pdf]

**Table S10.** Average log2 signal intensity values and CV values of 75 detected ZmLTP transcripts in sixty distinct tissues representing eleven major organ systems of inbred line B73 ordered by three clusters.

| Cluster | Probe ID          | Name       | Germinating          | Root                 | Whole Seedling  |                    |                    |                   | Stem and SAM    |                 |                 |  |
|---------|-------------------|------------|----------------------|----------------------|-----------------|--------------------|--------------------|-------------------|-----------------|-----------------|-----------------|--|
|         |                   |            | Seed                 |                      |                 |                    |                    |                   |                 |                 |                 |  |
|         |                   |            | 24H_Germinating Seed | 6DAS_GH_Primary Root | VE_Primary Root | V1_GH_Primary Root | 6DAS_GH_Coleoptile | VE_Whole Seedling | V1_Stem and SAM | V3_Stem and SAM | V4_Stem and SAM |  |
| I       | GRMZM2G027378_T01 | E2enzyme   | 14.99108344          | 14.96681372          | 15.08497063     | 15.13858015        | 14.64734925        | 14.68300126       | 14.91667599     | 14.89353998     | 14.76298105     |  |
|         | GRMZM2G083725_T01 | ZmLTPg4    | 13.87081295          | 9.798044608          | 9.566718994     | 9.279310397        | 12.54429042        | 12.66984775       | 11.66176408     | 11.23747209     | 11.00543328     |  |
|         | GRMZM2G101958_T01 | ZmLTP1.6   | 15.43595056          | 5.944157934          | 5.86597871      | 5.708280789        | 14.77260169        | 13.97230106       | 11.98962401     | 12.1247562      | 11.8650346      |  |
|         | GRMZM2G137329_T01 | ZmLTP2.1   | 9.781391871          | 6.10518166           | 6.04857669      | 5.614069729        | 11.70236284        | 11.72127898       | 8.27527778      | 9.169359349     | 9.801450538     |  |
|         | GRMZM2G107839_T02 | ZmLTP1.3.2 | 7.930266572          | 4.960581101          | 7.751873576     | 6.385911515        | 10.39280923        | 13.25931411       | 11.11643015     | 11.19503787     | 11.56415078     |  |
|         | GRMZM2G107839_T01 | ZmLTP1.3.1 | 8.260831797          | 5.422447829          | 8.148904024     | 6.857657216        | 11.26990716        | 13.91562197       | 11.72152189     | 11.89933689     | 12.25289454     |  |
|         | GRMZM2G010868_T01 | ZmLTP1.2.1 | 12.83178981          | 5.120302147          | 4.953554627     | 5.310347513        | 13.52072236        | 13.44654956       | 11.87526323     | 11.24417945     | 11.33791002     |  |
|         | GRMZM2G010868_T02 | ZmLTP1.2.2 | 13.36298633          | 5.573491295          | 5.299871143     | 5.628925855        | 13.57608914        | 13.40283343       | 11.49475772     | 10.91574486     | 10.99955154     |  |
|         | GRMZM2G170969_T01 | ZmLTPd13   | 7.83956002           | 11.72300744          | 12.17967237     | 10.76136752        | 7.348852847        | 7.63068494        | 10.5212676      | 10.33023919     | 10.84936804     |  |
|         | GRMZM2G126397_T01 | ZmLTP1.1   | 8.465328269          | 5.585514215          | 5.78419275      | 5.621128317        | 13.25788126        | 12.82102273       | 12.99856183     | 12.48069183     | 11.88653622     |  |
|         | GRMZM2G136364_T02 | ZmLTPd3.1  | 8.55897357           | 9.594155846          | 10.68928615     | 9.106544672        | 9.542046517        | 9.649223042       | 10.6516256      | 10.95219133     | 14.3996985      |  |
|         | GRMZM2G136364_T01 | ZmLTPd3.2  | 8.55897357           | 9.594155846          | 10.68928615     | 9.106544672        | 9.542046517        | 9.649223042       | 10.6516256      | 10.95219133     | 14.3996985      |  |
|         | GRMZM2G164440_T01 | ZmLTPd5    | 9.275555412          | 11.16326919          | 12.70851287     | 11.54977129        | 9.804099033        | 10.99006754       | 11.26394203     | 11.16719111     | 11.53672245     |  |
|         | GRMZM2G141858_T02 | ZmLTPg17.2 | 9.183614447          | 12.57051706          | 11.33685615     | 11.75255043        | 11.34452014        | 11.25550541       | 11.74505377     | 11.31408924     | 11.78429808     |  |
|         | GRMZM2G141858_T01 | ZmLTPg17.1 | 9.863915432          | 13.06191773          | 11.8169141      | 12.24608882        | 11.74752236        | 11.73746803       | 12.10576216     | 11.81137787     | 12.23999155     |  |
|         | GRMZM2G089400_T01 | ZmLTPg19   | 11.08186433          | 10.4815189           | 11.64035122     | 10.80695422        | 10.69425675        | 10.61462221       | 10.75967658     | 10.75008117     | 10.86104227     |  |
|         | GRMZM2G078876_T01 | ZmLTPg3    | 11.39754703          | 11.25258837          | 10.75483925     | 10.46094757        | 11.90724091        | 11.35134605       | 11.3210038      | 10.93393667     | 10.40344711     |  |
|         | GRMZM5G898755_T02 | ZmLTP1.7.1 | 5.922265114          | 9.35679242           | 6.406865643     | 7.292075182        | 13.07291472        | 12.19344665       | 12.56366231     | 12.84180539     | 13.20454547     |  |
|         | GRMZM5G898755_T01 | ZmLTP1.7.2 | 6.031675328          | 9.644585551          | 6.672254382     | 7.532602634        | 13.61430747        | 12.68239662       | 12.9602683      | 13.23674861     | 13.69946677     |  |
|         | GRMZM5G850455_T02 | ZmLTPg1.2  | 10.84871682          | 8.502349853          | 7.157336315     | 6.691846906        | 12.5643128         | 12.23680715       | 13.34330358     | 13.35090871     | 13.22172759     |  |
| II      | GRMZM5G850455_T01 | ZmLTPg1.1  | 10.45803785          | 8.432620369          | 7.128376993     | 6.662665768        | 12.53459291        | 12.18733932       | 13.22578827     | 13.31221039     | 13.18817246     |  |
|         | GRMZM5G850455_T03 | ZmLTPg1.3  | 10.45803785          | 8.432620369          | 7.128376993     | 6.662665768        | 12.53459291        | 12.18733932       | 13.22578827     | 13.31221039     | 13.18817246     |  |
|         | GRMZM2G091054_T01 | ZmLTPd14   | 7.546653517          | 4.711569209          | 4.757126488     | 4.766745108        | 4.671617883        | 4.856082958       | 4.634610935     | 4.767328062     | 4.737055439     |  |
|         | GRMZM2G406552_T01 | ZmLTP2.3   | 6.211689595          | 6.448964505          | 5.46784283      | 5.698830261        | 5.614353809        | 6.035973217       | 5.523002235     | 5.153593929     | 5.35924308      |  |
|         | GRMZM2G087413_T01 | ZmLTPd6    | 6.36506539           | 5.294239939          | 5.147739929     | 5.068861703        | 5.20272888         | 5.297904354       | 5.34691446      | 5.205323888     | 5.286879765     |  |
|         | GRMZM2G081464_T01 | ZmLTP2.2   | 12.33738346          | 4.551674596          | 4.730742698     | 4.695722129        | 4.99370791         | 5.254608636       | 4.892007412     | 4.963768331     | 4.747189336     |  |
|         | GRMZM2G063375_T01 | ZmLTPd16   | 5.311377292          | 4.782482261          | 4.723191578     | 4.823482248        | 4.790297653        | 4.827412215       | 4.94069201      | 4.755430377     | 4.646265421     |  |
|         | GRMZM2G155555_T01 | ZmLTPd15   | 5.274446575          | 4.751429433          | 4.699864146     | 4.812150202        | 4.755888265        | 4.936002419       | 4.909747552     | 4.762361727     | 4.697828079     |  |
|         | GRMZM2G387360_T01 | ZmLTP2.4   | 4.984559403          | 5.469276357          | 5.489543749     | 5.257845594        | 5.524424717        | 8.272927672       | 8.090119231     | 6.640191783     | 5.860390759     |  |
|         | GRMZM2G166484_T01 | ZmLTPx2    | 8.00434085           | 7.605477457          | 7.463015478     | 7.619487551        | 7.091376343        | 8.378530977       | 7.052680961     | 7.92469698      | 7.639205208     |  |
|         | GRMZM2G071575_T01 | ZmLTPg14   | 12.31359798          | 6.355488282          | 6.147973867     | 5.944248849        | 8.171251756        | 6.638227938       | 7.811545734     | 7.325482095     | 7.348346796     |  |
|         | GRMZM2G403007_T01 | ZmLTP2.6   | 6.725901712          | 14.4260496           | 13.16111882     | 13.53123194        | 11.78822413        | 8.49044606        | 10.63449006     | 10.84334673     | 11.94154429     |  |
|         | GRMZM2G004909_T01 | ZmLTP2.7   | 6.134896778          | 13.65041712          | 12.71530221     | 12.96139907        | 9.95799559         | 9.00642108        | 9.565376503     | 9.233501145     | 10.8395306      |  |
|         | GRMZM2G031102_T01 | ZmLTPd1    | 6.042274091          | 13.80285917          | 14.52636537     | 14.12600422        | 9.233038111        | 11.41613854       | 10.47228365     | 9.150929803     | 11.05294268     |  |
|         | GRMZM2G099867_T01 | ZmLTPd4    | 6.042274091          | 13.80285917          | 14.52636537     | 14.12600422        | 9.233038111        | 11.41613854       | 10.47228365     | 9.150929803     | 11.05294268     |  |
|         | GRMZM2G168833_T01 | ZmLTPg9    | 6.472667529          | 6.253107803          | 6.300233929     | 6.1326723          | 8.675208247        | 9.899354262       | 6.645632074     | 6.489101947     | 6.595204149     |  |
|         | GRMZM2G005991_T01 | ZmLTPg7    | 5.926548638          | 7.51703008           | 11.33375848     | 12.35132163        | 6.621747027        | 11.82066366       | 7.118810064     | 7.336635911     | 6.890032281     |  |
|         | GRMZM2G006047_T02 | ZmLTPg6    | 6.710132523          | 9.190946032          | 12.0556046      | 12.85110679        | 7.931172207        | 12.03817705       | 9.038675772     | 8.910163487     | 7.445716305     |  |
|         | GRMZM2G170044_T01 | ZmLTPg22   | 11.75291457          | 9.843314368          | 10.3980977      | 8.940283468        | 8.044709355        | 10.1112996        | 9.078827159     | 9.567440717     | 10.2298226      |  |
| III     | GRMZM2G004466_T01 | ZmLTPg25   | 6.271925412          | 9.147292831          | 9.865381436     | 8.275933343        | 8.251338097        | 9.758383976       | 9.49743278      | 10.35568197     | 10.97779353     |  |
|         | GRMZM2G065557_T01 | ZmLTPd8    | 6.924854401          | 10.84611322          | 10.79655138     | 9.393593067        | 8.869856983        | 9.334800181       | 8.606041287     | 9.91331258      | 11.33182535     |  |
|         | GRMZM2G320373_T01 | ZmLTP2.8   | 11.45190881          | 10.17273512          | 10.33634988     | 8.624651011        | 8.821365324        | 8.035352868       | 7.959556661     | 8.38290461      | 10.37181735     |  |
|         | GRMZM2G116167_T01 | ZmLTPg18   | 6.548395756          | 9.690543281          | 8.633749113     | 8.763806117        | 10.59921311        | 8.711253352       | 8.377524889     | 8.733767386     | 8.248962733     |  |
|         | GRMZM2G097137_T01 | ZmLTPg5    | 7.784534579          | 8.091670568          | 9.597044029     | 10.70686402        | 7.873424248        | 8.148832988       | 7.825260982     | 8.03332879      | 7.794217118     |  |
|         | GRMZM2G140646_T01 | ZmLTPg26   | 7.593281673          | 8.024727445          | 7.878006909     | 8.093285737        | 8.099376552        | 8.206925531       | 7.515060076     | 8.11234466      | 7.876561108     |  |
|         | GRMZM2G046750_T01 | ZmLTPg21   | 5.165703919          | 6.00009625           | 8.91596149      | 10.05785895        | 5.383756125        | 9.978171506       | 6.275136072     | 6.353476447     | 5.614176371     |  |
|         | GRMZM2G130454_T03 | ZmLTPg16   | 5.095868854          | 5.683813072          | 8.783022239     | 9.908405032        | 5.458236712        | 8.913644004       | 6.1672417       | 5.832798339     | 5.458973505     |  |
|         | GRMZM2G176347_T01 | ZmLTPg13   | 5.286333506          | 5.875321566          | 7.901471021     | 8.718545027        | 5.743552848        | 7.505803007       | 5.604549793     | 5.632455561     | 5.706802186     |  |
|         | GRMZM2G096234_T01 | ZmLTP1.4   | 10.55290918          | 7.359112816          | 6.858275729     | 6.326417745        | 6.451103924        | 6.299796838       | 6.213997137     | 6.118161997     | 6.145963427     |  |
|         | GRMZM2G094632_T01 | ZmLTPd9.2  | 6.592360492          | 6.761987586          | 6.985999198     | 7.035433788        | 5.927611216        | 7.69560213        | 6.397389264     | 6.633349947     | 7.334615258     |  |
|         | GRMZM2G094632_T02 | ZmLTPd9.1  | 6.828023813          | 6.906259569          | 7.397146127     | 7.215429253        | 6.106037324        | 8.206240611       | 6.541963535     | 7.046774959     | 7.744319714     |  |
|         | AC225127.3_FGT003 | ZmLTPc1    | 6.888084351          | 5.779797372          | 5.659487855     | 5.68465593         | 5.979955421        | 5.501663841       | 5.963336406     | 5.493577386     | 5.499831208     |  |
|         | GRMZM2G073377_T01 | ZmLTPc2.1  | 5.162498604          | 5.298899966          | 5.11150631      | 5.381963947        | 5.22091915         | 5.484212649       | 5.007371489     | 5.075899027     | 5.174243621     |  |
|         | GRMZM2G073377_T04 | ZmLTPc2.2  | 5.277676516          | 5.782212             | 5.528788092     | 5.466184848        | 5.710435065        | 6.090537039       | 5.464521187     | 5.5615939       | 5.671433542     |  |
|         | GRMZM2G025026_T02 | ZmLTP1.5.2 | 5.283649373          | 5.46264739           | 5.653375731     | 5.565853048        | 5.135099522        | 5.120616946       | 5.482822845     | 5.519704624     | 6.167380399     |  |
|         | GRMZM2G025026_T01 | ZmLTP1.5.1 | 5.653628217          | 5.508313728          | 5.653375731     | 5.552455196        | 5.140730212        | 5.173658459       | 5.682992263     | 5.441734433     | 6.167380399     |  |
|         | GRMZM2G393150_T01 | ZmLTP2.9   | 5.803418447          | 5.170244143          | 5.055817482     | 5.246089265        | 5.138632806        | 5.188222401       | 5.481397134     | 5.326263156     | 5.752435688     |  |
|         | GRMZM2G036063_T03 | ZmLTPx1.3  | 5.454025693          | 5.528377847          | 5.380563059     | 5.255061282        | 5.355678461        | 5.276782447       | 5.097496938     | 5.24682949      | 5.310462853     |  |
|         | GRMZM2G036063_T01 | ZmLTPx1.1  | 5.251793061          | 5.403031432          | 5.283659177     | 5.299423991        | 5.51036061         | 5.387491007       | 5.166595576     | 5.176206785     | 5.542989375     |  |
|         | GRMZM2G036063_T02 | ZmLTPx1.2  | 5.251793061          | 5.403031432          | 5.283659177     | 5.299423991        | 5.51036061         | 5.387491007       | 5.166595576     | 5.176206785     | 5.542989375     |  |
|         | GRMZM2G439268_T01 | ZmLTP1.8   | 10.36871047          | 5.433531275          | 5.315425256     | 5.533900945        | 5.397205118        | 5.370978282       | 4.778752114     | 4.933716461     | 5.204089133     |  |
|         | GRMZM2G151021_T01 | ZmLTPg11   | 5.216806318          | 5.243268935          | 5.295664933     | 5.119975515        | 5.252780826        | 5.775937271       | 5.906597873     | 5.177849977     | 5.452794366     |  |
|         | GRMZM2G039383_T01 | ZmLTP2.5   | 7.524092393          | 5.988345827          | 6.206465945     | 6.044498626        | 10.87973886        | 6.029012445       | 6.135726247     | 6.041820087     | 6               |  |

| Internode    |                    |                    |                     | Cob              |                        | Leaves           |                          |                 |                         |                         |
|--------------|--------------------|--------------------|---------------------|------------------|------------------------|------------------|--------------------------|-----------------|-------------------------|-------------------------|
| V5_Shoot Tip | V5_First Internode | V7_First Internode | V9_Fourth Internode | V18_Immature Cob | R1_Pre-pollination Cob | V1_Pooled Leaves | V3_First Leaf and Sheath | V3_Topmost Leaf | V5_Base of stage-2 Leaf | V7_Base of stage-2 Leaf |
| 14.95020591  | 14.89897196        | 14.91088606        | 15.04541993         | 14.81239968      | 15.00153645            | 14.71295858      | 15.03668792              | 14.62578307     | 14.67739792             | 14.96059379             |
| 10.48052697  | 10.28007168        | 10.1151912         | 8.836060239         | 11.74875268      | 13.04109927            | 12.65255558      | 12.36844789              | 12.92337686     | 12.56785184             | 12.77825897             |
| 11.03278346  | 11.71327151        | 11.0524337         | 9.006933633         | 7.655210343      | 10.42019268            | 14.42517946      | 14.81542795              | 14.40973837     | 13.59933077             | 13.19408424             |
| 7.130579871  | 8.792656321        | 8.700491951        | 6.071929818         | 5.769905034      | 7.457539422            | 13.65724689      | 13.92123685              | 13.11526829     | 7.911805615             | 8.450275743             |
| 9.520982661  | 10.61646727        | 11.40746325        | 5.150949396         | 5.23497808       | 6.145949042            | 13.50689077      | 12.35579622              | 13.72178919     | 12.56161769             | 10.78143201             |
| 10.2378934   | 11.47776862        | 12.10474889        | 5.454935074         | 5.521947505      | 6.489718001            | 14.0458245       | 13.16810619              | 14.22777303     | 13.25224884             | 11.46380992             |
| 10.79465057  | 10.48193261        | 10.50397454        | 6.986419886         | 6.269061292      | 11.61996859            | 13.37141649      | 12.90597293              | 13.62763889     | 13.48794969             | 13.09027857             |
| 10.2687132   | 10.43065173        | 10.49393478        | 7.548207696         | 6.398919755      | 11.3718515             | 13.45311547      | 12.99677114              | 13.59918424     | 13.63774325             | 13.18508001             |
| 10.94057629  | 11.70765276        | 11.37493071        | 9.415123152         | 9.486233756      | 12.4489527             | 5.91967844       | 5.844246193              | 6.068672619     | 7.994276367             | 7.274500144             |
| 12.07188453  | 10.07509537        | 8.246652692        | 10.83745442         | 12.45991551      | 13.80326823            | 7.161891387      | 6.715038033              | 10.27268263     | 12.93734133             | 13.60531302             |
| 12.19085846  | 13.31584142        | 15.08267137        | 13.44075495         | 8.993323844      | 11.25885523            | 8.879254467      | 7.869386749              | 9.898978483     | 10.73426128             | 12.67139392             |
| 12.19085846  | 13.31584142        | 15.08267137        | 13.44075495         | 8.993323844      | 11.25885523            | 8.879254467      | 7.869386749              | 9.898978483     | 10.73426128             | 12.67139392             |
| 11.42155473  | 11.79181895        | 12.41704           | 12.19282838         | 11.11218503      | 11.23109305            | 11.44935747      | 9.15215861               | 10.81143068     | 11.93924078             | 11.89859715             |
| 11.85311192  | 11.15796888        | 11.89329658        | 12.15153007         | 11.20337445      | 11.64681413            | 11.28841134      | 10.69828841              | 11.25471985     | 10.8589648              | 11.30182754             |
| 12.28750011  | 11.59609885        | 12.34354059        | 12.57979732         | 11.73426785      | 12.1239076             | 11.69188504      | 10.95559518              | 11.70438844     | 11.26006841             | 11.72400438             |
| 11.05192881  | 11.36282798        | 11.53991697        | 11.20531801         | 9.17523721       | 10.52659417            | 10.35263552      | 11.85817469              | 10.26834441     | 10.01745309             | 10.19582093             |
| 11.13145825  | 11.26918055        | 11.40136195        | 11.89382604         | 11.15100229      | 12.69101951            | 10.8880534       | 9.781712723              | 11.28433569     | 12.71637928             | 12.89550714             |
| 13.57587849  | 13.4404095         | 13.6623195         | 13.50367008         | 11.64875825      | 13.7445634             | 6.424127023      | 6.974334019              | 10.35645012     | 14.20775913             | 14.23142664             |
| 14.02891706  | 13.87379553        | 14.14303967        | 14.04701297         | 11.94954179      | 14.1010431             | 6.199333066      | 6.854699382              | 10.67463744     | 14.61343432             | 14.64247716             |
| 13.64251999  | 12.91446719        | 13.16087093        | 12.73428929         | 13.23669274      | 13.91211896            | 6.610086052      | 8.229420646              | 9.621090103     | 13.46953517             | 13.9828609              |
| 13.61302192  | 12.89857199        | 13.14081774        | 12.70393553         | 13.22638707      | 13.88239907            | 6.718888869      | 8.194145134              | 9.49213269      | 13.43841779             | 14.06123125             |
| 13.61302192  | 12.89857199        | 13.14081774        | 12.70393553         | 13.22638707      | 13.88239907            | 6.718888869      | 8.194145134              | 9.49213269      | 13.43841779             | 14.06123125             |
| 4.797696856  | 4.775335135        | 4.702723746        | 4.773306485         | 5.02047952       | 4.886266696            | 5.01192913       | 4.831634901              | 5.113073322     | 4.736243409             | 4.738897878             |
| 5.158114317  | 5.225662272        | 5.168299251        | 5.292529617         | 5.341899576      | 5.262169663            | 5.330350594      | 5.246578262              | 5.311106519     | 5.188291667             | 5.233150973             |
| 5.236543287  | 5.374672973        | 5.091698518        | 5.293560189         | 5.873982073      | 5.399780862            | 5.243669721      | 5.043074295              | 5.37476538      | 5.12275425              | 5.111526656             |
| 4.997114915  | 4.745030078        | 4.700633144        | 4.892736209         | 5.019592243      | 4.684129397            | 5.452693087      | 5.407119679              | 5.153783155     | 4.86564864              | 4.948041999             |
| 4.947797273  | 4.587165699        | 4.70961427         | 4.564402364         | 4.73756265       | 4.559742545            | 4.955493323      | 5.053042908              | 5.06193027      | 4.636646382             | 4.963134297             |
| 4.858322261  | 4.627827836        | 4.737038949        | 4.723633386         | 4.746058311      | 4.570433381            | 4.993802858      | 4.82721898               | 5.047533654     | 4.631735685             | 4.850063779             |
| 5.781635541  | 5.633862953        | 5.548935147        | 6.227085889         | 6.106370709      | 5.936291499            | 7.174089047      | 11.41261035              | 6.471979852     | 5.879578943             | 5.69883129              |
| 8.397908167  | 6.933333385        | 7.117966813        | 8.633840518         | 9.254362124      | 7.87732225             | 7.820832211      | 7.755638768              | 6.932764458     | 6.818594178             | 6.926467459             |
| 6.778222061  | 6.641739093        | 6.691646104        | 5.882548491         | 7.301218632      | 7.452686268            | 7.812169014      | 7.751414094              | 8.150954367     | 8.794525299             | 8.9843958               |
| 9.887366763  | 11.99377713        | 13.07525448        | 10.23903152         | 6.189676925      | 10.57411641            | 7.04015668       | 7.043765894              | 7.560912722     | 8.644236833             | 8.929111774             |
| 8.015683441  | 9.879275563        | 11.8497032         | 10.18705417         | 6.826245699      | 8.977724119            | 8.261458674      | 7.639709085              | 8.180706253     | 8.353842117             | 8.713681182             |
| 8.374159259  | 10.94027721        | 12.70311159        | 9.230503026         | 6.408597919      | 8.714803114            | 11.71834394      | 7.362699397              | 11.94589693     | 11.45069487             | 12.02565907             |
| 8.374159259  | 10.94027721        | 12.70311159        | 9.230503026         | 6.408597919      | 8.714803114            | 11.71834394      | 7.362699397              | 11.94589693     | 11.45069487             | 12.02565907             |
| 6.928821127  | 7.217318804        | 7.678893793        | 7.01848526          | 6.794092456      | 6.903946509            | 9.580442021      | 8.655654248              | 10.73418329     | 7.874054383             | 6.382065089             |
| 6.101143867  | 7.626299638        | 10.39906406        | 6.4400009           | 5.820604156      | 6.376709102            | 11.24552894      | 7.883274537              | 11.63915268     | 9.092086056             | 7.275790726             |
| 7.008533954  | 9.304317226        | 12.06165882        | 6.169550325         | 5.795414961      | 5.414101162            | 11.91800498      | 10.11774873              | 12.51957381     | 10.19037154             | 7.356592131             |
| 10.03639427  | 11.06587336        | 11.57420893        | 9.157825652         | 7.835035046      | 9.070447807            | 10.55619935      | 8.827227535              | 10.97862882     | 9.605181998             | 9.204400101             |
| 10.47371668  | 11.46383398        | 11.81474509        | 9.548046854         | 8.519921189      | 9.186678467            | 9.163779479      | 7.844792569              | 9.372104355     | 9.063073788             | 8.931783795             |
| 10.1584471   | 11.74050735        | 13.40707133        | 10.59923097         | 7.174444283      | 8.98512949             | 9.964084667      | 9.400848742              | 9.227108319     | 8.986673713             | 9.856919121             |
| 8.812525163  | 10.33284528        | 12.86476602        | 9.852140247         | 6.268938529      | 7.468480723            | 6.904337297      | 6.632895524              | 7.900348423     | 9.871923165             | 9.341822101             |
| 8.628532728  | 8.49142056         | 9.416018279        | 10.04315043         | 7.917781403      | 9.708236012            | 7.188452931      | 6.484104835              | 7.617226242     | 9.332144617             | 10.26622706             |
| 7.82449345   | 7.790061383        | 8.967702264        | 7.852551625         | 7.435115273      | 7.371908846            | 8.529449148      | 7.732769267              | 8.697718365     | 7.726869649             | 7.832157088             |
| 8.693541328  | 7.904814385        | 8.30593707         | 8.860353229         | 8.350406574      | 8.145301515            | 8.959293004      | 8.15579566               | 8.175484613     | 8.567003759             | 7.78394216              |
| 5.64593778   | 6.35575016         | 10.10295707        | 4.179508224         | 5.116813904      | 5.003573365            | 10.50286754      | 6.910012167              | 10.87502435     | 7.052531735             | 4.925351167             |
| 5.389683214  | 5.973963694        | 8.381752355        | 5.659389559         | 5.266093829      | 5.090652939            | 8.264560237      | 6.519168139              | 9.45356578      | 7.684602939             | 5.953086515             |
| 5.493579871  | 6.194203146        | 8.040042189        | 6.168164589         | 5.740544373      | 5.571078585            | 7.1020399        | 6.690361764              | 8.18512495      | 6.629423436             | 5.951870785             |
| 6.457076442  | 6.104944575        | 6.309741674        | 6.665678565         | 6.460448381      | 6.404406114            | 6.958101215      | 6.216069784              | 6.547658733     | 6.437125979             | 6.154541533             |
| 6.808282203  | 6.46529511         | 7.159131986        | 6.650586731         | 8.252537696      | 7.03341495             | 8.008466833      | 8.273639854              | 8.915287929     | 7.055244417             | 6.903665991             |
| 7.13667614   | 6.419703263        | 7.632856401        | 7.343191678         | 8.741218418      | 7.87803013             | 8.719221378      | 8.561859692              | 9.320715007     | 7.621782031             | 7.244183317             |
| 5.695353996  | 5.907429494        | 5.840944486        | 5.346397102         | 5.50026178       | 6.085558895            | 5.716101076      | 6.328072395              | 5.743325573     | 5.620611076             | 6.091472097             |
| 5.448671895  | 5.371011146        | 5.333610661        | 5.414477312         | 5.547811825      | 5.39772526             | 5.9305726        | 7.105365718              | 6.101525306     | 5.287296625             | 5.241945788             |
| 5.974527954  | 5.983754212        | 5.946945133        | 6.608651721         | 6.36942628       | 6.400525595            | 6.464973728      | 6.355860776              | 6.015483397     | 6.446411792             | 5.797965503             |
| 6.214756457  | 5.656789362        | 5.982096968        | 5.863962224         | 5.426481179      | 6.648391628            | 5.308555445      | 5.154149833              | 5.323294543     | 5.478010444             | 5.508552997             |
| 6.214756457  | 5.382695449        | 5.90038085         | 5.845807069         | 5.361201486      | 6.648391628            | 6.02012797       | 5.320745834              | 5.412251653     | 5.160986954             | 5.349217191             |
| 5.547062957  | 5.355639715        | 5.569605681        | 5.944408789         | 6.206964204      | 5.262243184            | 5.597333294      | 5.174534756              | 5.372799536     | 5.132766655             | 5.721927193             |
| 5.391254309  | 5.283060745        | 5.387175526        | 5.437182469         | 5.395002504      | 5.501397751            | 5.652266653      | 5.222030732              | 5.252888843     | 5.457361462             | 5.288612315             |
| 5.391254309  | 5.281962185        | 5.435525138        | 5.455057758         | 5.58991697       | 5.537729538            | 5.92423551       | 5.332298465              | 5.471220939     | 5.457361462             | 5.330998361             |
| 5.391254309  | 5.281962185        | 5.435525138        | 5.455057758         | 5.58991697       | 5.537729538            | 5.92423551       | 5.332298465              | 5.471220939     | 5.457361462             | 5.330998361             |
| 5.288609652  | 5.419023798        | 5.489966196        | 5.582738392         | 5.17779869       | 5.355971969            | 5.911251615      | 5.05243864               | 5.193739307     | 5.761752115             | 5.324800247             |
| 5.39499302   | 5.236427767        | 5.070467477        | 5.630583639         | 6.963003392      | 5.639931858            | 5.436271551      | 5.347346143              | 5.053776464     | 5.972022271             | 5.393672132             |
| 5.853557447  | 6.080665502        | 6.3630761          | 6.689525611         | 5.822327939      | 6.328788931            | 6.239878477      | 6.329265873              | 6.049807971     | 6.247901295             | 6.347820769             |
| 6.555458869  | 6.218072516        | 6.243385297        | 7.04294987          | 6.86356995       | 7.138555731            | 6.998237079      | 6.833996999              | 6.945616606     | 6.531227065             | 6.654026521             |
| 6.669781474  | 7.5725396          | 7.294092449        | 6.898877063         | 6.440307993      | 6.529212682            | 6.638277202      | 6.680958678              | 6.136198534     | 6.353166465             | 6.535327279             |
| 5.570000019  | 5.515730297        | 5.78189192         | 5.989113508         | 5.657568917      | 5.7723695              | 5.569777729      | 5.547765634              | 5.345432969     | 5.522220694             | 5.735138278             |
| 5.851830077  | 5.705079845        | 6.360222271        | 6.466468212         | 5.683117847      | 6.246175149            | 6.154345119      | 5.878598834              | 5.606187828     | 5.871282416             | 5.797992852             |
| 5.12088855   | 4.729663188        | 4.750048425        | 5.195364236         | 5.232984683      | 4.997376133            | 6.567248023      | 6.665871258              | 7.725411244     |                         |                         |

| Tassel and Anthers     |                        |                    |                  |                    |                    |                    |                |                     |                    |             |             |
|------------------------|------------------------|--------------------|------------------|--------------------|--------------------|--------------------|----------------|---------------------|--------------------|-------------|-------------|
| V5_Tip of stage-2 Leaf | V7_Tip of stage-2 Leaf | V9_Immature Leaves | V9_Eleventh Leaf | V9_Thirteenth Leaf | VT_Thirteenth Leaf | R2_Thirteenth Leaf | V9_Eighth Leaf | V13_Immature Tassel | V18_Meiotic Tassel | R1_Silks    | R1_Anthers  |
| 14.9597247             | 14.93030013            | 14.71119165        | 14.98487679      | 14.76304437        | 14.99438767        | 15.11359589        | 15.1201473     | 15.06172001         | 14.81218859        | 14.90280327 | 14.60959308 |
| 11.83977831            | 10.70141189            | 12.82964421        | 12.37583469      | 12.39140257        | 11.65915384        | 11.38570891        | 11.31130257    | 13.07146913         | 14.40486644        | 14.96811654 | 13.45873038 |
| 14.17365429            | 12.9997975             | 13.4688125         | 14.38538395      | 14.67669803        | 13.66598284        | 13.75736399        | 13.9236243     | 9.357628774         | 12.94911972        | 15.103246   | 13.2691526  |
| 13.53070748            | 12.82397698            | 9.446569296        | 13.66669373      | 13.80330407        | 13.34174241        | 12.94435379        | 13.10737729    | 7.567943842         | 9.752526862        | 9.515747237 | 12.20620577 |
| 12.65365465            | 12.30542211            | 13.3240019         | 14.34252694      | 14.35508976        | 12.00784129        | 12.22562225        | 12.39983157    | 6.091749759         | 14.82119682        | 13.40817808 | 13.80026292 |
| 13.29565894            | 12.95944117            | 14.02280114        | 14.82776609      | 14.88685895        | 12.80153651        | 12.8590679         | 12.96540307    | 6.466846922         | 15.12580974        | 14.05248273 | 14.35060524 |
| 11.95014789            | 10.79809806            | 13.95107309        | 13.7468713       | 14.22067797        | 11.50047445        | 10.92381175        | 11.13907023    | 9.2309582           | 14.14598967        | 14.89998938 | 13.24548023 |
| 12.42758497            | 11.09020155            | 14.00116719        | 13.86861496      | 14.3712011         | 11.63156466        | 11.14464814        | 11.28656626    | 8.839798998         | 14.21773499        | 15.25473371 | 13.32755426 |
| 5.812260725            | 6.355135592            | 5.73256136         | 8.252107156      | 5.899061014        | 6.06236394         | 6.053685986        | 8.037859167    | 9.91357998          | 7.216920431        | 5.721762175 | 6.210742536 |
| 6.588328382            | 6.713795619            | 12.398633          | 6.513061389      | 6.947419616        | 9.184493648        | 8.692411258        | 7.981012055    | 13.51069158         | 12.75276362        | 14.68211991 | 10.35604821 |
| 11.107863              | 10.73614633            | 10.9902875         | 13.61495349      | 12.52043872        | 10.12434403        | 8.938618311        | 10.95241068    | 10.59375669         | 12.31242556        | 8.96329943  | 8.898158013 |
| 11.107863              | 10.73614633            | 10.9902875         | 13.61495349      | 12.52043872        | 10.12434403        | 8.938618311        | 10.95241068    | 10.59375669         | 12.31242556        | 8.96329943  | 8.898158013 |
| 9.005973447            | 8.062749214            | 12.52350583        | 11.93601858      | 12.48705643        | 7.626942864        | 6.831221892        | 6.853133544    | 11.46298768         | 10.87724628        | 9.596807908 | 7.302348091 |
| 8.87155161             | 8.232275954            | 11.60473195        | 10.54444248      | 10.21421132        | 9.348507726        | 9.753086707        | 10.15683321    | 11.28592106         | 11.91402669        | 13.19283978 | 12.47827088 |
| 9.337485195            | 8.902403284            | 12.02590836        | 11.13670214      | 10.71490593        | 9.988879016        | 10.24310767        | 10.66269173    | 11.84291049         | 12.41873441        | 13.5073827  | 12.96802246 |
| 10.36632241            | 9.171418934            | 9.802910419        | 10.38898175      | 10.15157196        | 9.031325848        | 10.99356851        | 9.313481325    | 9.488889142         | 11.36312624        | 10.68727245 | 11.85611912 |
| 10.28722919            | 9.85439412             | 13.03715329        | 10.83200804      | 11.72338817        | 10.30132528        | 10.11706527        | 9.674548245    | 11.77721965         | 12.00999188        | 13.41851879 | 11.14138363 |
| 5.915741526            | 5.768598408            | 13.92974871        | 9.973874903      | 10.64491679        | 6.162470984        | 6.896647397        | 6.244511439    | 12.40242385         | 13.4584896         | 12.23229191 | 12.71823903 |
| 5.95561301             | 5.661939488            | 14.46484117        | 10.17662269      | 10.99017194        | 6.115468581        | 6.678634565        | 6.276133002    | 12.80328206         | 13.93396083        | 12.63957776 | 13.16924277 |
| 6.771310989            | 6.067589753            | 13.01138213        | 12.03823599      | 11.35391953        | 6.744236669        | 7.417718434        | 7.856280428    | 13.89026025         | 13.09864222        | 13.39845606 | 10.63603262 |
| 6.74263329             | 6.293008174            | 13.02163649        | 11.85005773      | 11.17427377        | 6.723356882        | 7.379544372        | 7.389239655    | 13.8359659          | 13.05830152        | 13.49419596 | 10.55581679 |
| 6.74263329             | 6.293008174            | 13.02163649        | 11.85005773      | 11.17427377        | 6.723356882        | 7.379544372        | 7.389239655    | 13.8359659          | 13.05830152        | 13.49419596 | 10.55581679 |
| 5.029469174            | 4.826531647            | 4.847846771        | 4.819739848      | 4.889385638        | 4.829258953        | 5.126378448        | 5.022806093    | 4.930214044         | 4.810540732        | 4.949311537 | 4.81694193  |
| 5.547689713            | 5.202995939            | 5.417545991        | 5.422047448      | 5.216547539        | 5.459661314        | 5.596569509        | 5.454131763    | 5.608555894         | 5.460591614        | 5.574978922 | 5.474335803 |
| 5.13357015             | 5.609932633            | 5.6461326          | 5.128370768      | 5.095303306        | 5.537012251        | 5.432468196        | 5.61182309     | 5.53278803          | 5.177711292        | 5.705518059 | 5.200973444 |
| 5.565236349            | 4.893234237            | 4.799097538        | 4.875252334      | 4.924237238        | 5.210743912        | 4.969193522        | 5.069548344    | 4.83055188          | 4.80033712         | 5.532767704 | 5.049923279 |
| 5.010983879            | 4.749885814            | 4.703716804        | 4.672974036      | 4.563992043        | 4.88610728         | 5.259788533        | 5.135080436    | 4.620389874         | 4.575763193        | 4.573674166 | 4.584433717 |
| 4.997572404            | 4.70846165             | 4.738643959        | 4.669611896      | 4.740271021        | 4.741842568        | 5.34847632         | 5.034279628    | 4.585980486         | 4.658523225        | 4.715571066 | 4.653444625 |
| 5.962353071            | 6.563164517            | 5.919655784        | 5.613718227      | 5.534085101        | 7.659491746        | 9.495593471        | 6.332742752    | 5.981089654         | 9.157938671        | 6.912492121 | 13.56167982 |
| 7.540533317            | 8.2078455              | 9.567262246        | 8.576513418      | 7.651901479        | 9.050081237        | 7.950534483        | 8.009501811    | 10.79115411         | 8.787803074        | 9.056929623 | 8.421544813 |
| 7.118371665            | 6.825196083            | 7.726532432        | 6.968100669      | 7.43162373         | 6.796191954        | 6.515637859        | 6.879229023    | 7.649272387         | 10.40596003        | 8.33827039  | 8.743904406 |
| 8.053591714            | 8.510853551            | 7.16335552         | 10.27873848      | 9.511780431        | 8.338076401        | 7.833152184        | 9.501598371    | 6.231585204         | 10.1670937         | 5.939551371 | 5.942168906 |
| 9.8239361              | 9.776399057            | 8.254082611        | 10.95668634      | 11.15257643        | 11.28972099        | 11.50621365        | 11.83756881    | 7.402658096         | 10.9771497         | 6.045319598 | 7.54364466  |
| 12.08796786            | 9.966553633            | 11.68615779        | 13.22397304      | 13.51178985        | 6.419383911        | 6.612686419        | 6.79401451     | 6.88807812          | 13.27103099        | 10.63908808 | 7.461660137 |
| 12.08796786            | 9.966553633            | 11.68615779        | 13.22397304      | 13.51178985        | 6.419383911        | 6.612686419        | 6.79401451     | 6.88807812          | 13.27103099        | 10.63908808 | 7.461660137 |
| 9.593862673            | 9.334656897            | 7.565226985        | 10.97587562      | 11.60422397        | 9.790749749        | 9.190770076        | 8.988457575    | 6.561188377         | 11.69157853        | 7.801616656 | 11.75880254 |
| 7.343590297            | 6.512571459            | 12.72540383        | 9.491077255      | 12.22539015        | 6.496466509        | 6.258928056        | 6.528069871    | 6.011110377         | 11.59826076        | 6.956372123 | 9.846144429 |
| 8.090150684            | 7.776532075            | 12.7201065         | 9.295509773      | 12.11130246        | 7.827688172        | 7.03268172         | 7.866732065    | 5.773638699         | 11.75454862        | 6.25216231  | 11.69484509 |
| 8.667984538            | 9.317219865            | 9.736064807        | 10.87682603      | 10.56247961        | 8.815080658        | 8.398891639        | 9.039336438    | 8.831706706         | 11.36706424        | 7.818791598 | 11.01846172 |
| 9.883152125            | 9.969704543            | 9.516998302        | 10.67231889      | 11.36889907        | 8.287307824        | 7.408203459        | 8.346187707    | 8.606145003         | 9.391726064        | 7.973704593 | 7.255445807 |
| 9.243943444            | 9.122099636            | 8.856165543        | 11.45131609      | 12.01056375        | 9.244985328        | 9.324459369        | 9.578122303    | 7.265975995         | 10.03805419        | 8.80359866  | 7.587384809 |
| 7.133135148            | 6.023808633            | 8.803823257        | 11.01400701      | 10.31427457        | 6.58332883         | 6.55561132         | 8.29748431     | 6.335043028         | 8.179251486        | 8.707606332 | 6.275402565 |
| 7.243883646            | 7.402754689            | 9.297818702        | 6.802565297      | 6.819742673        | 7.203582935        | 6.810178297        | 6.701466105    | 7.924784268         | 7.343680788        | 11.48756504 | 7.092442388 |
| 7.660852493            | 7.169780133            | 7.901736304        | 7.511025833      | 7.705585413        | 7.436392888        | 7.51502176         | 7.419506328    | 7.482579773         | 8.024094365        | 7.849474564 | 7.970379028 |
| 8.496591169            | 9.072477472            | 8.903650415        | 8.604569464      | 7.921665384        | 8.889201535        | 8.113768954        | 7.71843301     | 8.498005077         | 7.706467416        | 8.388693892 | 8.067358178 |
| 5.607226294            | 5.023116265            | 11.52149855        | 8.698438211      | 11.69118764        | 5.151794144        | 5.300104995        | 5.208948571    | 5.098003082         | 10.44236155        | 4.784881892 | 8.319840541 |
| 5.65910216             | 6.039762542            | 9.241686249        | 6.57146251       | 8.538415953        | 5.65806661         | 5.710851635        | 4.903431342    | 5.049392827         | 7.413654599        | 5.816959232 | 7.133588966 |
| 6.067628777            | 6.574073085            | 9.132303924        | 6.550597234      | 8.624346835        | 6.280258772        | 5.823613236        | 5.520536855    | 5.771344901         | 7.605836846        | 5.756536904 | 6.755167242 |
| 6.395721912            | 6.188388498            | 6.73838947         | 6.783280551      | 6.35904485         | 11.52113785        | 10.45458217        | 8.404449833    | 6.391104518         | 12.71128907        | 6.952205245 | 6.103173137 |
| 7.136305745            | 7.869168128            | 7.009943416        | 7.299664587      | 7.14960928         | 7.526165863        | 7.627150478        | 8.710147379    | 8.057898805         | 15.36595562        | 7.458226004 | 6.905407414 |
| 7.372036147            | 8.448778087            | 7.956565585        | 7.914898658      | 7.589778629        | 8.092587796        | 8.584288605        | 9.27655723     | 8.828002207         | 15.66203004        | 8.255164842 | 7.449369828 |
| 6.366031559            | 5.362909191            | 5.356163487        | 5.772022313      | 5.71320101         | 5.841812411        | 7.36191216         | 6.945555071    | 5.55744959          | 14.83454246        | 5.973387046 | 6.162505108 |
| 6.497724877            | 6.179846884            | 5.558943028        | 5.504743855      | 5.419029279        | 6.165406403        | 5.943359803        | 7.573643765    | 5.381181999         | 13.445679          | 5.835223015 | 5.471668817 |
| 6.795318993            | 7.123370377            | 6.255519949        | 6.1016178        | 5.915193428        | 7.232618012        | 6.767177073        | 6.448748842    | 6.311787751         | 12.71599437        | 7.069270087 | 6.097095638 |
| 5.578319038            | 5.489883368            | 5.271082526        | 5.488659262      | 5.18456911         | 5.265108517        | 5.869499268        | 5.913360316    | 5.559878101         | 15.54068988        | 5.245787062 | 5.264925993 |
| 5.818074569            | 5.949398797            | 5.283873557        | 5.53595749       | 5.372648523        | 5.537357876        | 5.85352681         | 5.985003042    | 5.720522315         | 15.54068988        | 5.245622653 | 5.295077769 |
| 5.324411824            | 5.2943752              | 5.490746078        | 5.246918397      | 6.344461281        | 5.567075166        | 6.009556532        | 5.559167524    | 5.782825793         | 11.75000723        | 5.229016636 | 5.346293203 |
| 5.409365566            | 5.438920088            | 5.663093333        | 5.395028333      | 5.320009612        | 5.490675322        | 5.371656319        | 5.317031381    | 5.258560273         | 10.0845582         | 5.669606724 | 5.208729703 |
| 5.409365566            | 5.438920088            | 5.693906425        | 5.462140111      | 5.214755647        | 5.627837377        | 5.371656319        | 5.286419575    | 5.221725834         | 9.134622849        | 5.669606724 | 5.169465323 |
| 5.409365566            | 5.438920088            | 5.693906425        | 5.462140111      | 5.214755647        | 5.627837377        | 5.371656319        | 5.286419575    | 5.221725834         | 9.134622849        | 5.669606724 | 5.169465323 |
| 5.675912984            | 5.978790584            | 5.598984623        | 5.599481411      | 5.097635955        | 5.817478534        | 5.055661982        | 5.11945189     | 5.196430363         | 4.885853252        | 5.293544151 | 5.568485007 |
| 5.450588627            | 5.787251109            | 5.501901882        | 5.405029281      | 5.243716194        | 6.343874871        | 5.496642513        | 5.754203926    | 9.213993519         | 6.77666946         | 6.515636091 | 5.469283286 |
| 6.630812956            | 6.97736962             | 6.069781839        | 5                |                    |                    |                    |                |                     |                    |             |             |

| Husk              |                   | Whole Seed    |                 |                 |                 |                 |                  |                  |                  |
|-------------------|-------------------|---------------|-----------------|-----------------|-----------------|-----------------|------------------|------------------|------------------|
| R1_Innermost Husk | R2_Innermost Husk | R2_Outer Husk | 2DAP_Whole Seed | 4DAP_Whole Seed | 6DAP_Whole Seed | 8DAP_Whole Seed | 10DAP_Whole Seed | 12DAP_Whole Seed | 14DAP_Whole Seed |
| 14.85820025       | 14.87294354       | 15.07281125   | 14.97340243     | 14.7738447      | 15.12955781     | 14.86449684     | 14.88814484      | 15.07322062      | 14.93413719      |
| 13.78050577       | 12.83318937       | 12.63798483   | 13.63128377     | 14.5036069      | 14.6534721      | 14.56176277     | 14.15834008      | 13.76500721      | 13.22457499      |
| 13.6654973        | 14.26010892       | 14.24028648   | 11.32644985     | 11.86529675     | 12.36856391     | 12.35428705     | 12.50563679      | 12.71321473      | 12.53803751      |
| 10.92979227       | 10.47891867       | 12.72569177   | 9.147549857     | 9.843473681     | 11.06417842     | 11.73541433     | 11.86872342      | 12.04703535      | 11.47495771      |
| 14.28113388       | 15.14775821       | 15.22979689   | 10.05687744     | 11.74600577     | 12.69207674     | 13.28811939     | 13.11770181      | 12.48217207      | 12.25401142      |
| 14.85653631       | 15.26209023       | 15.53339491   | 10.85781574     | 12.32758746     | 13.33839359     | 13.95039446     | 13.811861        | 13.31499892      | 12.87590967      |
| 14.62729072       | 14.96903419       | 14.42720869   | 12.27235914     | 12.90552099     | 13.3117262      | 13.37958226     | 13.33363093      | 12.46645322      | 12.10076969      |
| 14.96104023       | 14.93652623       | 14.63528528   | 11.76929884     | 12.84574458     | 12.80515181     | 13.09525095     | 13.16553744      | 12.50861712      | 11.88419179      |
| 6.206010788       | 6.118903933       | 5.999877403   | 12.651856       | 12.35496527     | 12.12285402     | 11.48951604     | 11.26994096      | 11.28572168      | 9.985186377      |
| 12.25584442       | 6.893531653       | 6.933167215   | 13.87676091     | 14.09557506     | 14.2427099      | 13.71932993     | 12.69046996      | 11.21377752      | 9.704733046      |
| 10.19944984       | 8.810616526       | 8.035759591   | 11.37190865     | 13.34448329     | 15.18255748     | 15.32303111     | 14.79876203      | 13.85806815      | 12.15234875      |
| 10.19944984       | 8.810616526       | 8.035759591   | 11.37190865     | 13.34448329     | 15.18255748     | 15.32303111     | 14.79876203      | 13.85806815      | 12.15234875      |
| 11.79418431       | 10.878331         | 9.638054262   | 11.53489707     | 11.4603532      | 12.30235401     | 12.1279318      | 11.92695757      | 12.84789896      | 12.0458376       |
| 12.74620905       | 12.52651327       | 11.97872937   | 11.81679176     | 11.77006923     | 12.48452107     | 12.03732772     | 11.87782708      | 11.70008398      | 11.36497242      |
| 13.19583492       | 13.22397093       | 12.41082346   | 12.29212147     | 12.29126749     | 13.00186889     | 12.52219689     | 12.45691707      | 12.16060705      | 11.81285388      |
| 11.63439069       | 10.80232752       | 11.71745344   | 10.93154359     | 11.23425757     | 11.87220695     | 11.33888446     | 10.96164581      | 11.60271627      | 11.87295055      |
| 12.40567837       | 11.51893938       | 11.09300609   | 12.59475654     | 12.94377991     | 13.19176339     | 13.10620687     | 12.89637633      | 13.02390086      | 12.9039104       |
| 14.25919387       | 9.995887882       | 7.369760944   | 13.95260464     | 14.57536376     | 14.52921567     | 14.33467049     | 14.33467049      | 13.66179205      | 13.15847481      |
| 14.45335425       | 10.25366885       | 7.110926588   | 14.32469214     | 14.94488441     | 14.84519565     | 14.67523008     | 14.39810587      | 14.20122123      | 13.65817594      |
| 14.03739625       | 12.97850612       | 12.53724068   | 13.9367448      | 14.00432664     | 13.84015457     | 13.48692685     | 13.24903124      | 13.18944185      | 12.95881872      |
| 14.19414976       | 12.89792368       | 12.47397671   | 14.17958296     | 13.97102252     | 13.83773624     | 13.47011026     | 13.20792216      | 13.12080865      | 12.87191122      |
| 14.19414976       | 12.89792368       | 12.47397671   | 14.17958296     | 13.97102252     | 13.83773624     | 13.47011026     | 13.20792216      | 13.12080865      | 12.87191122      |
| 4.808163758       | 5.155443686       | 4.875266885   | 4.782827969     | 4.911815864     | 5.709304491     | 13.27767497     | 14.63191088      | 15.12494954      | 15.14461667      |
| 5.23045036        | 6.456201834       | 5.654366093   | 5.314698164     | 5.574952751     | 8.264388297     | 12.78073441     | 14.25897644      | 14.97693347      | 14.73787558      |
| 5.313835076       | 5.037659634       | 5.824501108   | 5.175531277     | 5.286027962     | 6.180794373     | 12.88224081     | 14.81483844      | 15.24908061      | 15.05239123      |
| 4.966452081       | 4.906648697       | 5.033444488   | 5.208263901     | 4.867586585     | 4.849570337     | 5.066453239     | 5.218925441      | 9.076859911      | 11.14547682      |
| 4.743949133       | 5.577881621       | 5.14314077    | 5.15408403      | 4.845958142     | 5.121358452     | 4.84072766      | 10.08647269      | 11.9483811       | 11.83126031      |
| 4.690961627       | 5.27743193        | 5.22868372    | 5.005590008     | 4.799912573     | 5.015140175     | 4.970995959     | 10.0520633       | 11.91450034      | 12.15282113      |
| 8.130278497       | 10.88473363       | 12.59099362   | 7.14294201      | 9.160954739     | 11.43913846     | 10.92355729     | 9.612398164      | 9.03835389       | 9.440896378      |
| 7.791445441       | 7.491187745       | 7.975577533   | 8.241422718     | 7.748852595     | 7.533594617     | 7.910034056     | 9.50503509       | 9.775345898      | 9.548788862      |
| 7.784912654       | 8.06630025        | 8.035380413   | 7.634580278     | 7.928638051     | 8.345260827     | 8.608817375     | 8.552435663      | 9.885322573      | 9.190933044      |
| 8.867910735       | 6.10127079        | 6.062137559   | 10.92850939     | 11.31533397     | 11.46460567     | 10.0273366      | 8.004942765      | 6.153838844      | 5.473785694      |
| 8.019095044       | 6.437359141       | 6.299656521   | 9.137242651     | 9.436138601     | 9.735730199     | 8.34863157      | 7.317110304      | 6.439568186      | 5.737784722      |
| 11.16566309       | 9.313036052       | 7.634585456   | 9.155102818     | 9.796715866     | 10.01299639     | 8.695056098     | 7.552991311      | 6.613546136      | 6.799124289      |
| 11.16566309       | 9.313036052       | 7.634585456   | 9.155102818     | 9.796715866     | 10.01299639     | 8.695056098     | 7.552991311      | 6.613546136      | 6.799124289      |
| 9.434543461       | 9.600091176       | 11.10553501   | 6.987917146     | 7.487451297     | 6.967611725     | 7.533775756     | 7.716473831      | 7.169207993      | 8.242348239      |
| 10.83843785       | 6.476732954       | 8.031278522   | 5.680483406     | 6.373750368     | 9.087144588     | 9.609257074     | 10.37260407      | 9.336099963      | 7.987305564      |
| 11.8913404        | 8.574122691       | 10.91142213   | 6.126712258     | 6.639336992     | 8.644331736     | 9.202778892     | 9.475875477      | 8.437267336      | 7.013702486      |
| 10.23265268       | 10.77834886       | 10.62401027   | 9.583088969     | 9.778545031     | 10.01043562     | 9.746896605     | 9.748402432      | 9.814301823      | 9.596928507      |
| 8.611495062       | 6.928648593       | 7.58883393    | 9.021222095     | 8.965422526     | 9.339940169     | 9.02235004      | 8.597023492      | 7.966395895      | 7.494507805      |
| 9.323288415       | 8.170655016       | 7.646497428   | 8.300708897     | 8.808216609     | 10.00355779     | 8.232687016     | 8.379098044      | 7.405962559      | 7.576121154      |
| 7.317208284       | 7.036882389       | 6.314887472   | 7.631017876     | 7.909234553     | 8.459554071     | 7.53398325      | 6.701820702      | 5.945916202      | 5.831862785      |
| 9.289936031       | 7.181017309       | 6.922061761   | 9.588429261     | 9.810413274     | 9.59321106      | 9.017454576     | 8.469521533      | 7.607117545      | 7.45285606       |
| 7.953708922       | 7.72732645        | 8.008437865   | 7.588406245     | 7.413728415     | 7.708353883     | 7.924109391     | 7.889866537      | 7.822176913      | 7.729507487      |
| 7.853667232       | 7.734787781       | 7.877530214   | 8.173222549     | 7.725313681     | 7.537657348     | 7.712037711     | 8.371639962      | 8.101646412      | 8.321666243      |
| 10.24911956       | 5.485020806       | 7.890442031   | 4.937391666     | 5.685793535     | 8.250922665     | 8.416998682     | 8.893979324      | 7.051782126      | 5.807812294      |
| 8.500357535       | 5.246769608       | 6.339749058   | 5.312608621     | 5.414945494     | 5.827557481     | 5.641937638     | 5.541967929      | 5.599966529      | 5.125074808      |
| 7.696525193       | 5.3000528         | 6.413723153   | 5.79311149      | 5.296457863     | 6.276961898     | 6.402592942     | 6.621715554      | 6.422650423      | 6.140402669      |
| 6.127516543       | 5.848873612       | 6.388246937   | 6.235970786     | 6.286802313     | 6.325486031     | 6.44549271      | 6.286581866      | 6.269732746      | 6.137067544      |
| 7.045661656       | 7.4845278         | 8.421433896   | 7.393136834     | 8.052511179     | 8.552090455     | 7.523376057     | 6.927169026      | 6.632114176      | 6.707883775      |
| 8.006166638       | 8.159595184       | 9.218896848   | 7.897943631     | 8.674237334     | 8.828333566     | 7.986473705     | 7.321936483      | 6.972997215      | 7.324904778      |
| 5.794456084       | 6.594257948       | 6.417301692   | 5.873513265     | 6.28719129      | 6.705536503     | 6.654061981     | 6.460594009      | 6.363451971      | 6.749216145      |
| 5.354171375       | 5.111109975       | 5.46434985    | 5.170290449     | 5.074922223     | 5.180055829     | 5.015612786     | 5.272150834      | 5.418162683      | 6.136278537      |
| 5.890616175       | 5.270539028       | 6.146517855   | 5.721077559     | 5.633434852     | 5.50260986      | 5.666063034     | 5.794459213      | 6.261131564      | 6.506010197      |
| 6.857256151       | 5.476094281       | 5.330174958   | 6.777629327     | 6.894763493     | 6.173397542     | 6.567124183     | 6.13682518       | 5.494381879      | 5.22010872       |
| 6.857256151       | 5.324273996       | 5.497614678   | 6.663501347     | 6.655976181     | 6.21804988      | 5.908369986     | 6.213524328      | 5.193912944      | 5.231917352      |
| 5.290923268       | 5.403747978       | 5.590590145   | 5.2138827       | 5.402969258     | 5.26757479      | 5.331975228     | 5.056915139      | 5.909793434      | 5.854085314      |
| 5.268929241       | 5.100752277       | 5.446319265   | 5.330367784     | 4.97015546      | 5.087993561     | 5.470820758     | 5.343750796      | 5.409145397      | 5.767244364      |
| 5.217383994       | 4.90336552        | 5.556624511   | 5.42465923      | 5.033153323     | 5.083245043     | 5.324040263     | 5.508619267      | 5.582562211      | 5.625214281      |
| 5.217383994       | 4.90336552        | 5.556624511   | 5.42465923      | 5.033153323     | 5.083245043     | 5.324040263     | 5.508619267      | 5.582562211      | 5.625214281      |
| 5.193418927       | 4.98848755        | 5.34259685    | 5.192484461     | 5.032085688     | 5.034960575     | 5.191708202     | 5.043301065      | 5.470668693      | 5.74714308       |
| 5.515460847       | 5.125269985       | 5.385200704   | 5.686155117     | 5.77776766      | 5.53087883      | 5.563566615     | 7.353052         | 8.49175628       | 7.426877326      |
| 5.936111351       | 5.537735368       | 6.172955649   | 6.100788471     | 5.386093748     | 5.802118638     | 5.574654407     | 5.96612026       | 5.711794362      | 5.897046818      |
| 6.700695577       | 6.115019978       | 6.710474601   | 7.227444077     | 6.708515531     | 6.583591874     | 6.218524665     | 6.2408575        | 6.086743496      | 6.025683649      |
| 6.160161836       | 5.838491188       | 6.18093035    | 6.691284037     | 6.904136353     | 6.375719095     | 6.690427603     | 6.398014999      | 6.141728226      | 5.875576261      |
| 5.248920393       | 4.921844882       | 5.31152655    | 5.303522611     | 5.101402581     | 5.084893291     | 5.135627114     | 5.371189497      | 5.371007826      | 5.700818251      |
| 5.550980204       | 5.177831973       | 5.422037427   | 5.317887667     | 5.250549912     | 5.093917329     | 5.177612317     | 5.561250377      | 5.528222262      | 5.913886437      |
| 5.292060906       | 5.382451311       | 5.310653218   | 5.360660446     | 5.355304388     | 7.259632584     | 7.870687297     | 5.94151111       | 5.69891225       | 5.485447187      |
| 5.42564279        | 4.846695149       | 5.402227379   | 4.917858131     | 4.743920404     | 4.866073368     | 4.782334648     | 5.179271947      | 5.341616734      | 5.273531794      |
| 4.799427895       | 4.766788005       | 4.872656375   | 4.876430892     | 4.763107889     | 4.936670205     | 5.004614594     | 4.718334808      | 4.793620761      | 4.893510013      |
| 5.360281261       | 4.877991907       | 4.953010984   | 4.906737617     | 4.825328351     | 5.131472212     | 4.859136642     | 4.95748265       | 4.922941504      | 5.266987183      |
| 5.573287075       | 4.915439237       | 4.916345191   | 5.239529276     | 5.063680324     | 4.918039686     | 4.803830523     | 4.711299373      | 5.144604397      | 4.866770777      |
| 5.686374858       | 5.691397006       | 6.15099357    | 6.104425532     | 5.44545869      | 5.664049053     | 5.597647286     | 5.920409652      | 5.582590395      | 5.894463265      |
| 5.292511274       | 5.027606501       | 5.557970336   | 5.253234051     | 5.143279304     | 5.010217964     | 5.055085134     | 5.848149862      | 5.355202806      | 5.332646003      |
| 5.656197946       | 5.287843862       | 5.514746849   | 5.311735868     | 5.356769755     |                 |                 |                  |                  |                  |

| Endosperm        |                  |                  |                  |                  |                 |                 |                 |                 |                 |                 |
|------------------|------------------|------------------|------------------|------------------|-----------------|-----------------|-----------------|-----------------|-----------------|-----------------|
| 16DAP_Whole Seed | 18DAP_Whole Seed | 20DAP_Whole Seed | 22DAP_Whole Seed | 24DAP_Whole Seed | 12DAP_Endosperm | 14DAP_Endosperm | 16DAP_Endosperm | 18DAP_Endosperm | 20DAP_Endosperm | 22DAP_Endosperm |
| 15.06384415      | 14.83026451      | 15.15673103      | 15.0266319       | 15.09183031      | 15.02821342     | 14.98584308     | 15.09509072     | 15.18066035     | 15.22506189     | 15.17645698     |
| 13.34486485      | 12.74903539      | 12.99354799      | 12.71473945      | 13.26806529      | 13.10055179     | 12.35614274     | 11.49721888     | 12.80589958     | 10.16701224     | 9.588437202     |
| 13.09499874      | 13.1878255       | 14.02126036      | 13.86045715      | 14.54153162      | 10.14042469     | 10.17091552     | 11.04598426     | 13.42902448     | 12.01843176     | 11.76811975     |
| 11.6329387       | 11.26651555      | 12.49275006      | 12.29710991      | 12.89744356      | 9.682572983     | 8.86574951      | 8.473634069     | 11.00396757     | 10.19484216     | 9.635453675     |
| 11.74765887      | 11.6183333       | 12.16193528      | 11.2816733       | 11.16160083      | 7.921376894     | 7.87151928      | 8.813876787     | 11.56092381     | 7.910352913     | 6.877561421     |
| 12.59917398      | 12.32927903      | 12.86613678      | 11.95736589      | 11.82806659      | 8.417356854     | 8.418542048     | 9.332852887     | 12.26637557     | 8.30617093      | 7.224429444     |
| 11.90665849      | 11.52594825      | 11.51954875      | 10.16028608      | 10.705642        | 8.773374095     | 8.367598345     | 8.472591555     | 11.24401898     | 6.65348555      | 5.86531087      |
| 12.1566726       | 11.60931032      | 11.7465065       | 11.14644557      | 11.54620989      | 8.477065496     | 8.351018905     | 8.578594662     | 11.41797171     | 7.996534003     | 7.833575876     |
| 9.22456944       | 9.279315733      | 10.05110155      | 9.580566077      | 9.979793942      | 9.351711956     | 8.72292134      | 8.160730189     | 9.288182739     | 6.673814506     | 6.658896789     |
| 9.458784953      | 8.99000785       | 9.976544582      | 9.96422162       | 10.78729812      | 8.867721351     | 7.780529436     | 7.767944735     | 7.465783831     | 7.298271705     | 6.837419636     |
| 10.30880985      | 8.517449522      | 8.470109663      | 8.262841166      | 10.05440006      | 11.88478618     | 8.852310648     | 5.567275626     | 6.211534299     | 5.783857484     | 5.710149274     |
| 10.30880985      | 8.517449522      | 8.470109663      | 8.262841166      | 10.05440006      | 11.88478618     | 8.852310648     | 5.567275626     | 6.211534299     | 5.783857484     | 5.710149274     |
| 12.14683819      | 11.31939364      | 11.85225586      | 11.5456905       | 11.81088363      | 10.71594333     | 9.767633942     | 9.334928318     | 10.90331779     | 7.593719466     | 7.542929145     |
| 11.06166048      | 11.08657892      | 11.31948609      | 11.07382227      | 11.00401486      | 10.76203071     | 9.740699168     | 9.63095775      | 9.971504705     | 9.566848522     | 9.391911597     |
| 11.41785806      | 11.51045505      | 11.75356761      | 11.55364609      | 11.48790168      | 11.15058432     | 10.11913513     | 10.03280127     | 10.36664705     | 9.858186569     | 9.913309865     |
| 11.84976773      | 11.23812714      | 11.47335762      | 11.23519012      | 11.61448589      | 12.1955701      | 12.11652861     | 11.53555214     | 11.70936653     | 11.41379774     | 11.32932142     |
| 13.17126872      | 12.24093556      | 12.47188052      | 12.2012656       | 12.43648006      | 12.80123157     | 12.30094041     | 12.79957967     | 12.48535345     | 12.59127248     | 12.63007902     |
| 13.05352087      | 12.70722354      | 13.04456751      | 12.55390024      | 12.8000097       | 11.79659073     | 11.23837213     | 11.50630409     | 12.9286909      | 10.00150116     | 9.990865787     |
| 13.52977666      | 13.19019605      | 13.6149214       | 13.02068912      | 13.30382333      | 12.1520866      | 11.62431196     | 11.85082333     | 13.38022867     | 10.21727266     | 10.31985983     |
| 12.7650619       | 12.71054285      | 12.89021968      | 12.42335173      | 12.74413512      | 12.97187922     | 12.61782924     | 12.33291905     | 12.84644997     | 12.504155       | 12.07395189     |
| 12.88210211      | 12.59784404      | 12.86376875      | 12.41732519      | 12.73538717      | 12.98249403     | 12.61248573     | 12.27900234     | 12.84489944     | 12.23018251     | 12.04093552     |
| 12.88210211      | 12.59784404      | 12.86376875      | 12.41732519      | 12.73538717      | 12.98249403     | 12.61248573     | 12.27900234     | 12.84489944     | 12.23018251     | 12.04093552     |
| 14.9888324       | 14.99328766      | 14.47280062      | 14.01742834      | 13.6152201       | 15.26018153     | 14.86262184     | 14.47647755     | 15.06412292     | 12.70161089     | 12.30534356     |
| 14.5499082       | 14.06798495      | 13.76874863      | 13.79814854      | 13.97649035      | 14.47604732     | 13.23894482     | 13.09275998     | 12.41494666     | 13.26834629     | 13.59116498     |
| 15.23444645      | 14.98010616      | 14.37909323      | 14.61508001      | 14.2827855       | 15.04142752     | 14.10615163     | 13.71165917     | 13.16002921     | 13.90185412     | 14.23679341     |
| 12.37752197      | 12.05071159      | 13.1813748       | 12.80632073      | 13.39114791      | 8.29943112      | 10.42191814     | 11.09028429     | 12.73105436     | 10.53753846     | 10.60545212     |
| 11.00165657      | 11.31718087      | 8.646537614      | 8.961461752      | 8.852193591      | 10.56278024     | 10.02970301     | 7.968824197     | 9.194986642     | 7.149065588     | 6.724355045     |
| 11.62170048      | 11.33119927      | 9.026632651      | 9.592509588      | 9.164037121      | 11.11711785     | 10.14758981     | 8.945144364     | 9.477524936     | 7.474405862     | 7.418839926     |
| 10.09286641      | 8.833261185      | 9.762469599      | 9.128262852      | 9.736703031      | 9.10524876      | 8.813818475     | 8.332898423     | 9.986872286     | 7.791351285     | 8.248428946     |
| 9.783910581      | 9.247628516      | 9.453467174      | 9.392155055      | 9.897784426      | 10.54862863     | 9.797960233     | 9.585669752     | 9.330071641     | 9.423619973     | 10.41768369     |
| 8.933259566      | 9.767411267      | 10.26635512      | 10.09996289      | 10.65972257      | 9.327885178     | 9.203506499     | 8.648916211     | 9.677310315     | 9.44036251      | 9.640822195     |
| 6.545180239      | 5.303418861      | 5.524957127      | 5.573702147      | 5.380032665      | 5.24446322      | 5.452761098     | 5.7323788       | 5.227756866     | 6.103214259     | 6.17406857      |
| 5.538932759      | 5.526925916      | 5.584140218      | 5.556731368      | 5.383750507      | 5.490968567     | 5.609391128     | 5.920944983     | 5.755029409     | 6.432445087     | 5.710015616     |
| 5.743478157      | 5.505936456      | 5.580560878      | 5.459354013      | 5.827981267      | 6.229132455     | 6.114060567     | 6.148688259     | 5.203773008     | 5.439483251     | 5.721168741     |
| 5.743478157      | 5.505936456      | 5.580560878      | 5.459354013      | 5.827981267      | 6.229132455     | 6.114060567     | 6.148688259     | 5.203773008     | 5.439483251     | 5.721168741     |
| 7.957993335      | 7.558909445      | 8.258226661      | 7.484601539      | 7.874461875      | 6.240557957     | 6.38234447      | 6.383612407     | 6.711978026     | 6.518591404     | 6.066376979     |
| 7.261281783      | 6.83277921       | 5.960795743      | 6.007511207      | 6.366108046      | 5.892016766     | 6.016301346     | 6.50357235      | 6.162209952     | 6.285462154     | 6.007428006     |
| 7.079524053      | 6.242208805      | 5.563762077      | 5.912772969      | 5.802036448      | 5.92738933      | 5.778275514     | 6.051077486     | 5.519638316     | 6.704928863     | 6.32886268      |
| 9.364367666      | 8.876930175      | 9.152361902      | 8.902016266      | 9.119767155      | 8.900718612     | 7.983698779     | 7.869147743     | 8.488222289     | 6.933572126     | 7.358553722     |
| 7.696507575      | 6.850310908      | 6.911116382      | 6.812276658      | 6.69809812       | 8.127879727     | 7.054558154     | 7.173565844     | 7.327269922     | 7.3237515       | 6.368782543     |
| 7.46150395       | 7.479660721      | 7.682732767      | 7.718589096      | 7.968045329      | 7.908421599     | 7.904922157     | 7.849488732     | 7.724821543     | 7.475012364     | 8.016580566     |
| 6.204350065      | 5.703327717      | 5.83082585       | 5.827309306      | 6.012455113      | 5.526974964     | 5.757436778     | 6.400907902     | 5.834874117     | 6.313167609     | 5.756924354     |
| 7.470132999      | 7.163425105      | 7.257725354      | 7.145286723      | 7.247263585      | 7.60750934      | 7.40047528      | 7.674902961     | 7.223641217     | 8.188771354     | 7.434024976     |
| 7.513112535      | 7.242882366      | 7.008189638      | 7.110119167      | 7.271765855      | 7.500514993     | 7.581745522     | 7.408350685     | 7.235909082     | 7.094423676     | 7.19451287      |
| 8.101080777      | 7.982844695      | 7.731643757      | 7.74135294       | 7.79502329       | 7.497258706     | 7.808037772     | 7.781778008     | 7.802412471     | 7.254772892     | 7.704713122     |
| 5.991832974      | 5.592417908      | 5.275108815      | 5.152354602      | 5.013949583      | 5.004202527     | 5.080610501     | 5.259362606     | 5.022380096     | 5.050145476     | 5.23641272      |
| 5.552687563      | 5.155231492      | 5.196669762      | 5.409806025      | 5.368370848      | 5.600363616     | 5.023334857     | 5.267553962     | 5.339321114     | 6.011350704     | 5.246153724     |
| 5.795984036      | 5.580716305      | 5.513478166      | 5.599112889      | 5.648412383      | 5.9915689103    | 5.915689103     | 6.262617583     | 5.496694919     | 7.442955315     | 5.295256434     |
| 6.427392999      | 6.261837923      | 6.415310365      | 6.19331136       | 6.155499257      | 6.276339922     | 6.079083433     | 6.707927159     | 6.370417217     | 6.742907383     | 6.405649885     |
| 6.417075794      | 6.393554434      | 6.743809083      | 6.091159259      | 6.311837796      | 6.783973673     | 6.275468439     | 6.79711062      | 6.501089818     | 6.504395547     | 6.638346991     |
| 6.848790219      | 6.401108846      | 6.876572087      | 6.287156532      | 6.371035635      | 6.973534016     | 6.526121033     | 7.211343173     | 6.873301967     | 6.67541412      | 6.842218984     |
| 6.983257153      | 6.332298028      | 6.596720815      | 6.214790307      | 6.311363467      | 7.127248119     | 7.200756004     | 6.927083252     | 7.031301063     | 6.976660334     | 7.106788121     |
| 6.884534766      | 5.833009367      | 6.510630369      | 5.726294108      | 5.793501698      | 6.358445169     | 6.88550407      | 7.469874578     | 6.853483689     | 6.583373163     | 6.566932284     |
| 7.378665354      | 5.970044015      | 6.481111948      | 6.095073589      | 6.253389105      | 6.4616864       | 6.543061959     | 6.689413854     | 6.467652562     | 6.650781016     | 6.706099259     |
| 5.314190261      | 5.179903975      | 5.373879501      | 4.900348772      | 5.140147757      | 5.589944234     | 4.989615999     | 6.248350539     | 5.065884069     | 5.341384813     | 5.328305165     |
| 5.122460967      | 5.189884912      | 5.291390353      | 5.419743289      | 5.140147757      | 5.419743289     | 4.989615999     | 5.930005946     | 5.119542588     | 5.166695049     | 5.328305165     |
| 6.560979539      | 5.920328474      | 6.933804831      | 6.45408032       | 6.748498691      | 7.152162703     | 6.539932711     | 6.233049195     | 7.136832439     | 5.491923517     | 6.304010268     |
| 5.500303593      | 5.401794395      | 5.61033671       | 5.479268775      | 5.309290822      | 5.78815856      | 5.338591716     | 5.644992895     | 5.405266748     | 5.922160218     | 5.522700882     |
| 5.338389067      | 5.631910913      | 5.501103058      | 5.175926088      | 5.305705387      | 5.540412447     | 5.441957811     | 5.275040827     | 5.227154447     | 6.107412368     | 5.435216169     |
| 5.338389067      | 5.631910913      | 5.501103058      | 5.175926088      | 5.305705387      | 5.540412447     | 5.441957811     | 5.275040827     | 5.227154447     | 6.107412368     | 5.435216169     |
| 7.262387456      | 7.192305777      | 9.194011238      | 9.054987309      | 10.49990529      | 5.260382816     | 5.860071175     | 6.029111672     | 8.322877169     | 6.608152691     | 6.751602225     |
| 8.106834324      | 6.938341791      | 7.404493025      | 7.407460283      | 7.733644137      | 9.319500641     | 8.41420488      | 7.230425807     | 6.971114193     | 7.846472726     | 8.198990134     |
| 5.9143326541     | 5.889762636      | 5.745756315      | 6.074139255      | 5.956812309      | 6.06182531      | 6.264520628     | 6.09486283      | 6.09402656      | 5.950152778     | 5.85996571      |
| 5.926991011      | 6.19781124       | 5.776577779      | 5.927854219      | 5.917678324      | 6.134111114     | 6.237198738     | 5.802202807     | 5.855825589     | 6.134086795     | 5.980543853     |
| 6.055876351      | 6.49646397       | 6.580245427      | 6.261979654      | 6.300181217      | 6.416468106     | 6.480816109     | 6.400002174     | 6.349855638     | 7.350058454     | 6.430361579     |
| 4.900405321      | 5.199272064      | 5.169597308      | 5.299817643      | 5.228993871      | 5.167864431     | 5.738801548     | 5.28287424      | 5.083993391     | 5.309487752     | 5.180299553     |
| 4.967069639      | 5.547606174      | 5.223199232      | 5.46280305       | 5.384504966      | 5.153180496     | 5.888793705     | 5.730154527     | 5.36373686      | 5.485434094     | 5.298228632     |
| 5.714424275      | 5.157243597      | 5.209725349      | 5.035609234      | 5.032757842      | 6.962439868     | 5.885859973     | 5.545270993     | 5               |                 |                 |

| Embryo          |              |              |              |              |              |                | S           | X <sub>mean</sub> | CV          |
|-----------------|--------------|--------------|--------------|--------------|--------------|----------------|-------------|-------------------|-------------|
| 24DAP_Endosperm | 16DAP_Embryo | 18DAP_Embryo | 20DAP_Embryo | 22DAP_Embryo | 24DAP_Embryo | 18DAP_Pericarp |             |                   |             |
| 14.94703959     | 15.03198922  | 15.08184243  | 14.73671161  | 15.02423301  | 15.04119612  | 15.00942463    | 0.115394704 | 14.98177666       | 0.007702338 |
| 9.401823552     | 14.15612887  | 14.00205385  | 13.96791036  | 14.2600858   | 14.50015141  | 13.78329141    | 1.794835356 | 13.43877789       | 0.133556442 |
| 11.75265706     | 14.42498441  | 14.37591012  | 14.07704121  | 14.08988464  | 14.09174551  | 14.21648515    | 0.940478207 | 13.86124401       | 0.067849481 |
| 9.063590147     | 7.141998758  | 6.61305679   | 7.440721921  | 8.276597869  | 9.328756254  | 13.2560256     | 2.229562387 | 8.731535334       | 0.255345973 |
| 5.553393352     | 7.96758116   | 8.035620577  | 8.747323041  | 9.117634798  | 9.919393423  | 12.68498715    | 2.169545583 | 8.860847643       | 0.24484628  |
| 6.04973631      | 8.402530217  | 8.581082257  | 9.365684779  | 9.869644189  | 10.65917809  | 13.38275932    | 2.255446617 | 9.472945023       | 0.238093498 |
| 5.441297813     | 12.30193327  | 11.97403847  | 11.27875736  | 10.92414346  | 11.06122394  | 12.63121334    | 2.450035263 | 10.80180109       | 0.226817291 |
| 7.38083957      | 12.41159247  | 12.21197404  | 11.58576441  | 11.41844265  | 11.44478392  | 12.66006361    | 1.797848363 | 11.30192295       | 0.159074555 |
| 6.293953392     | 11.34602941  | 11.4717509   | 11.04681393  | 11.61703017  | 12.27074272  | 10.47547824    | 1.995187267 | 10.64597125       | 0.187412423 |
| 7.034584662     | 13.13368253  | 13.01098817  | 12.72180366  | 12.65230454  | 12.76370479  | 8.8623705      | 2.45804486  | 11.45420555       | 0.214597586 |
| 6.079507501     | 10.6953785   | 10.78174792  | 11.2964738   | 11.80799992  | 12.83183728  | 9.425192656    | 2.181278392 | 10.4168768        | 0.209398502 |
| 6.079507501     | 10.6953785   | 10.78174792  | 11.2964738   | 11.80799992  | 12.83183728  | 9.425192656    | 2.181278392 | 10.4168768        | 0.209398502 |
| 7.025953463     | 11.58447582  | 11.56429975  | 11.56868234  | 12.11731633  | 12.42952827  | 12.67298168    | 1.928587205 | 11.28046252       | 0.170967033 |
| 9.160123637     | 11.32924458  | 11.21370915  | 11.20383552  | 11.16651133  | 11.66772647  | 13.22115786    | 1.185875267 | 11.28032979       | 0.105127712 |
| 9.525704544     | 11.78220931  | 11.67713832  | 11.6709376   | 11.61883203  | 12.1386841   | 13.55430711    | 1.181278705 | 11.70968757       | 0.100880463 |
| 10.8837724      | 11.21856916  | 11.26856015  | 11.09313332  | 11.08958932  | 11.12685582  | 11.32022181    | 0.144731116 | 11.14295743       | 0.012988573 |
| 12.05440926     | 12.73534051  | 12.42118161  | 12.30599131  | 12.4361335   | 12.1403503   | 12.88576821    | 0.300355522 | 12.42559639       | 0.024172322 |
| 8.620921617     | 11.29737306  | 11.28285453  | 11.8846959   | 12.60748991  | 13.05088922  | 13.37706106    | 1.597129361 | 11.73161219       | 0.13613895  |
| 8.595925693     | 11.63062527  | 11.69768259  | 12.38193491  | 13.09376998  | 13.60968698  | 13.9961316     | 1.806879872 | 12.14367957       | 0.148791794 |
| 11.89068736     | 13.09897839  | 12.98057904  | 13.01259308  | 12.94852935  | 13.20834793  | 13.37506671    | 0.482010777 | 12.93068312       | 0.037276513 |
| 11.78381491     | 13.08468525  | 12.95054222  | 12.96626124  | 12.92440422  | 13.17617107  | 13.34615896    | 0.510259227 | 12.89029112       | 0.039584771 |
| 11.78381491     | 13.08468525  | 12.95054222  | 12.96626124  | 12.92440422  | 13.17617107  | 13.34615896    | 0.510259227 | 12.89029112       | 0.039584771 |
| 11.56011976     | 12.29896012  | 8.555209895  | 10.74004992  | 10.66270429  | 10.91808253  | 14.05003078    | 1.683919814 | 11.25502247       | 0.149614967 |
| 13.26376641     | 10.21215528  | 8.839935819  | 10.90162707  | 11.72830528  | 10.23743666  | 12.54637549    | 1.519213347 | 11.10422886       | 0.136813944 |
| 13.67170577     | 11.26044904  | 10.32070059  | 12.20727779  | 12.6423669   | 11.13020371  | 13.41137352    | 1.24542096  | 12.09201105       | 0.102995354 |
| 10.44152129     | 9.079706172  | 5.662080985  | 8.384113529  | 8.364120103  | 8.416924495  | 10.98236478    | 1.726336627 | 8.761547336       | 0.197035588 |
| 6.168667128     | 6.132868899  | 5.335564866  | 6.050392717  | 5.565244515  | 4.921690023  | 7.298260675    | 0.76241276  | 5.924669832       | 0.12868443  |
| 6.281820216     | 6.690728552  | 5.189331527  | 6.256817701  | 5.62930139   | 5.21707255   | 8.142394458    | 1.027693179 | 6.201066628       | 0.165728453 |
| 7.606991638     | 7.31279099   | 6.316128766  | 6.39422423   | 6.300855907  | 6.90374737   | 8.315096367    | 0.766513694 | 7.021405038       | 0.109168135 |
| 10.44058463     | 8.179194383  | 8.020824782  | 7.678156731  | 7.834394119  | 7.597638952  | 8.463311173    | 0.982872901 | 8.316300681       | 0.118186311 |
| 8.538186612     | 11.54045884  | 11.23310272  | 11.37728269  | 11.71826846  | 11.90860367  | 7.937183684    | 1.642847161 | 10.60758381       | 0.154874775 |
| 5.695704268     | 5.211531916  | 5.593303015  | 5.243717795  | 5.974198216  | 5.510073233  | 5.927378572    | 0.300571327 | 5.593701002       | 0.053733892 |
| 5.660867041     | 6.09371668   | 5.811478723  | 5.74098779   | 5.947171534  | 5.868328101  | 5.817031401    | 0.141059263 | 5.84851161        | 0.024118831 |
| 5.893952439     | 6.546490896  | 6.366300699  | 6.361918857  | 6.517153786  | 6.313792918  | 6.167790298    | 0.222874615 | 6.309628556       | 0.035322937 |
| 5.893952439     | 6.546490896  | 6.366300699  | 6.361918857  | 6.517153786  | 6.313792918  | 6.167790298    | 0.222874615 | 6.309628556       | 0.035322937 |
| 6.133191731     | 6.105348384  | 6.152435112  | 6.080662701  | 6.254875944  | 6.197796872  | 10.43990986    | 1.62094476  | 6.766317229       | 0.239560858 |
| 6.310616387     | 5.707181301  | 5.621327483  | 5.627967014  | 5.989881926  | 5.870966777  | 6.648050553    | 0.385914427 | 5.967998777       | 0.064663959 |
| 6.336771774     | 6.019272093  | 5.22171043   | 5.295656943  | 5.853993359  | 5.905461223  | 6.062783946    | 0.409628024 | 5.813664253       | 0.070459525 |
| 7.116457313     | 6.686772425  | 6.636613818  | 6.257971249  | 6.765865194  | 6.752845282  | 10.23811194    | 1.359737852 | 7.207805317       | 0.188647971 |
| 6.691416029     | 7.518601153  | 7.123480241  | 7.102818863  | 7.298209286  | 6.937618487  | 7.037111653    | 0.262146409 | 7.101322245       | 0.036915155 |
| 8.164936411     | 7.046745156  | 7.058444618  | 6.66992008   | 7.121730568  | 7.56067226   | 7.02252527     | 0.48560316  | 7.23495738        | 0.067119008 |
| 5.745351813     | 6.67672837   | 6.323142678  | 6.804374048  | 7.1838014    | 7.818686536  | 6.07469044     | 0.698889713 | 6.660967898       | 0.104923147 |
| 7.416173845     | 7.07559081   | 7.093664443  | 6.966569336  | 7.315228456  | 7.545385457  | 8.010909613    | 0.35788552  | 7.346217423       | 0.048716979 |
| 7.190019183     | 7.490249602  | 7.231445378  | 7.111184111  | 7.388643611  | 7.286377317  | 7.425482972    | 0.136841072 | 7.303343168       | 0.018736771 |
| 7.8955003       | 8.283698233  | 8.557005652  | 8.455441118  | 8.312106124  | 8.050859977  | 7.862757944    | 0.271086793 | 8.202481335       | 0.033049364 |
| 5.095074691     | 4.996412057  | 4.920181678  | 4.975908395  | 4.986448986  | 4.773549379  | 5.430961601    | 0.203568674 | 5.025505255       | 0.040507106 |
| 5.281907268     | 5.04327994   | 5.500670059  | 5.009079652  | 5.208290305  | 5.305550126  | 5.108710026    | 0.171849908 | 5.208212482       | 0.032995948 |
| 5.683116543     | 5.614775098  | 5.499604344  | 5.651731994  | 5.872858435  | 5.524795453  | 6.046828717    | 0.196170731 | 5.699101512       | 0.034421344 |
| 6.419687623     | 6.177480677  | 6.569837376  | 6.225919362  | 6.337324204  | 6.380440793  | 6.653573778    | 0.17198803  | 6.39489483        | 0.026894583 |
| 6.083651595     | 6.696573066  | 6.79261534   | 6.576825732  | 6.545405769  | 6.925159983  | 7.426696175    | 0.408910415 | 6.720989666       | 0.060840804 |
| 6.270975823     | 6.984370042  | 7.375547272  | 6.769599944  | 7.014740549  | 7.437243612  | 8.285426871    | 0.630421404 | 7.16255773        | 0.08801624  |
| 6.364044223     | 6.574064994  | 5.97271328   | 6.36180109   | 6.079917783  | 6.172891602  | 7.023032336    | 0.353267168 | 6.364066473       | 0.05550966  |
| 5.981232244     | 5.457542777  | 5.852957007  | 5.002380931  | 5.347353609  | 5.234716143  | 5.748804204    | 0.35565404  | 5.517855274       | 0.064455123 |
| 6.038650701     | 6.01016739   | 6.164571805  | 5.493528446  | 5.955745505  | 5.809433955  | 6.559069131    | 0.325547736 | 6.004452419       | 0.054217723 |
| 5.197794594     | 5.265556406  | 5.503175858  | 5.299251536  | 5.300949955  | 5.30635422   | 5.134100706    | 0.114924935 | 5.286740468       | 0.021738335 |
| 5.254645349     | 5.25657887   | 5.404174552  | 5.321425533  | 5.301709001  | 5.30635422   | 5.283485763    | 0.050752406 | 5.304053327       | 0.009568608 |
| 5.445751474     | 6.037945251  | 5.841021069  | 6.181617909  | 5.904800606  | 6.409270977  | 5.33382547     | 0.384069418 | 5.879176108       | 0.065327082 |
| 5.665814409     | 5.148493685  | 5.647705668  | 5.338112913  | 5.326939373  | 5.323439362  | 5.741172326    | 0.225382215 | 5.455953962       | 0.041309406 |
| 5.593302314     | 5.264376054  | 5.640022394  | 5.511534862  | 5.417813958  | 5.460210178  | 5.649799846    | 0.138169495 | 5.505294229       | 0.025097568 |
| 5.593302314     | 5.264376054  | 5.640022394  | 5.511534862  | 5.417813958  | 5.460210178  | 5.649799846    | 0.138169495 | 5.505294229       | 0.025097568 |
| 5.89970022      | 6.077556705  | 5.493864613  | 5.989704638  | 5.851179041  | 7.570281833  | 6.210135007    | 0.6625657   | 6.156060294       | 0.107628202 |
| 8.065297697     | 5.825395736  | 5.362863901  | 5.13352167   | 5.565198963  | 4.994131128  | 5.593821737    | 1.041957712 | 5.791461547       | 0.179912739 |
| 6.229863424     | 6.069656423  | 6.05600932   | 6.671862654  | 6.358518139  | 8.36751342   | 6.028756297    | 0.836974007 | 6.540311382       | 0.127971584 |
| 6.482467778     | 5.807648768  | 6.238543709  | 6.256388088  | 6.067484061  | 6.500145446  | 6.15825092     | 0.240147744 | 6.215846967       | 0.038634758 |
| 6.290137732     | 6.97288059   | 6.794940781  | 6.443355323  | 7.124753302  | 7.0695342    | 6.566392639    | 0.324918694 | 6.75171351        | 0.048123886 |
| 5.538291892     | 5.473019108  | 5.675862486  | 5.520834098  | 5.469197778  | 5.301311506  | 5.187170155    | 0.161182022 | 5.452241003       | 0.029562527 |
| 5.686614087     | 5.546508464  | 5.894096345  | 5.646051577  | 5.60289397   | 5.362548289  | 5.325936193    | 0.194877005 | 5.580664132       | 0.034920038 |
| 5.219397374     | 5.074365814  | 4.813357808  | 4.98794355   | 4.892195191  | 5.196880825  | 5.287212713    | 0.177849232 | 5.067336182       | 0.035097184 |
| 5.226139733     | 4.843225936  | 5.093193103  | 4.911464891  | 5.45865399   | 5.003875358  | 5.488279184    | 0.255276197 | 5.146404599       | 0.049602823 |
| 4.731905123     | 4.856176352  | 4.814057321  | 5.047672297  | 4.858063639  | 4.823626206  | 4.937772108    | 0.100650392 | 4.867039007       | 0.020680005 |
| 4.894903536     | 4.919694111  | 5.003307158  | 4.998214193  | 5.007421853  | 4.886485609  | 4.859899429    | 0.062787749 | 4.938560841       | 0.012713774 |
| 4.691898198     | 4.869510279  | 5.03120718   | 4.655736654  | 5.062644544  | 5.997411773  | 5.093372292    | 0.450158725 | 5.057397274       | 0.089009959 |
| 5.865606064     | 5.780784958  | 5.777822817  | 5.861992921  | 5.731377708  | 5.658663686  | 5.86070455     | 0.078326758 | 5.790993243       | 0.013525617 |
| 5.385296807     | 5.21931812   | 5.008141488  | 5.344709998  | 5.215722577  | 5.186039928  | 5.300370267    | 0.124731479 | 5.237085598       | 0.023816964 |
| 5.234990709     | 5.415332925  | 5.322615971  | 5.252797322  | 5.381316785  | 5.374220657  | 5.829599377    |             |                   |             |
